# Supplementary material for: RNA-binding protein Mub1 and the nuclear RNA exosome act to fine-tune environmental stress response
Source: Life Sci Alliance. 2021 Nov 30;5(2):e202101111. doi: 10.26508/lsa.202101111 (PMC8645331; doi:10.26508/lsa.202101111)
Supplement: Supplementary file 1 [file LSA-2021-01111_TableS1.xlsx]

## Sheet: Description
Supplementary Tables
	Table S1 : Whole cell extract normalisation data of comparative RIC MS data

## Sheet: Table 1
pombase_ID	gene_name	chrom	description	N_mtl1_vs_N_WT_FX_diff	N_mtl1_vs_N_WT_FX_p.val	N_rrp6_vs_N_WT_SX_diff	N_rrp6_vs_N_WT_SX_p.val	N_dis3_vs_N_WT_SX_diff	N_dis3_vs_N_WT_SX_p.val
SPBC1289.01c	chr4	chromosome_2	1,3-beta-glucan synthase regulatory factor Chf3/Chr4	-0.966523	0.630124	-5.10319	0.016668	-0.39401	0.84405
SPCC191.07	cyc1	chromosome_3	cytochrome c	-0.547085	0.599678	-4.2103	0.000423329	-2.09143	0.0533115
SPAC1F3.01	rrp6	chromosome_1	exosome 3'-5' exoribonuclease subunit Rrp6	-2.45363	0.000445747	-4.11799	4.82039e-07	1.31978	0.0385066
SPBC776.01	rpl29	chromosome_2	60S ribosomal protein L29	-0.2933	0.851279	-3.98552	0.0166782	-0.631158	0.687018
SPBC30D10.18c	rpl102	chromosome_2	60S ribosomal protein L10a	-0.453848	0.710734	-3.73905	0.00502212	0.172127	0.888
SPBC776.14	plh1	chromosome_2	phospholipid-diacylglycerol acyltransferase Plh1	-0.2933	0.826216	-3.72388	0.00957374	0.482404	0.718251
SPAC31G5.18c	sde2	chromosome_1	intron-specific pre-mRNA splicing-ubiquitin fusion protein Sde2	-0.2933	0.639182	-3.51128	7.74377e-06	-0.825912	0.193789
SPAPB1E7.12	rps602	chromosome_1	40S ribosomal protein S6	0.0957308	0.950297	-3.34487	0.0377076	0.282436	0.854133
SPBC29A3.07c	sap14	chromosome_2	U2 snRNP-associated protein SF3B14 Sap14	0.93255	0.424591	-3.2976	0.00843319	-2.3871	0.0485289
SPAC23A1.11	rpl1602	chromosome_1	60S ribosomal protein L13/L16 (predicted)	0.243559	0.69498	-3.28951	1.73639e-05	0.605794	0.333496
SPCPJ732.01	vps5	chromosome_3	retromer complex subunit Vps5	-0.575935	0.555519	-3.24491	0.00257218	-1.28425	0.195062
SPCC162.08c	nup211	chromosome_3	nucleoporin nup211	1.29684	0.408953	-3.17731	0.05058	0.865812	0.579907
SPACUNK4.11c	mpp6	chromosome_1	nuclear exosome-associated RNA binding protein Mpp6	-0.981229	0.310814	-3.15462	0.00283291	-0.384238	0.688711
SPBC1289.17	Tf2-11	chromosome_2	retrotransposable element/transposon Tf2-type	0.096371	0.913821	-2.99259	0.00240516	-0.430509	0.629594
SPAC57A7.06	utp14	chromosome_1	U3 snoRNP protein Utp14 (predicted)	-0.627017	0.401877	-2.79668	0.000870119	1.22739	0.107888
SPCC330.14c	rpl2402	chromosome_3	60S ribosomal protein L24 (predicted)	-0.2933	0.587662	-2.79413	2.36767e-05	-1.27699	0.0249731
SPAC1B2.03c	elo2	chromosome_1	fatty acid elongase Elo2 (predicted)	-4.65701	0.00127508	-2.76079	0.0405838	1.31459	0.312749
SPBC3E7.15c	lac1	chromosome_2	sphingosine N-acyltransferase Lac1	-0.725831	0.590228	-2.68457	0.054918	0.207156	0.877505
SPAC1687.06c	rpl44	chromosome_1	60S ribosomal protein L28/L44 (predicted)	1.19588	0.168627	-2.65841	0.00430598	-1.95501	0.0291909
SPBC2G5.06c	hmt2	chromosome_2	sulfide-quinone oxidoreductase	-4.12019	8.54963e-05	-2.65325	0.00563581	-0.791073	0.373231
SPAC11D3.01c		chromosome_1	Con-6 family conserved fungal protein	-4.26	0.00221496	-2.64929	0.0434587	-3.86382	0.004801
SPBC18E5.07	aim21	chromosome_2	barbed end F-actin assembly inhibitor	0.136467	0.842606	-2.64634	0.000702139	-1.84374	0.0122342
SPBC800.04c	rpl4301	chromosome_2	60S ribosomal protein L37a (predicted)	-3.59993	0.0703075	-2.56259	0.190031	-0.458278	0.811417
SPAC1B3.02c		chromosome_1	transcription elongation factor, Elf1 family (predicted)	-0.2933	0.662402	-2.53667	0.000834677	-0.505274	0.453769
SPCC18.05c	rsa4	chromosome_3	notchless-like ribosome biogenesis protein Rsa4 (predicted)	1.48976	0.192585	-2.42861	0.0389024	0.108438	0.923055
SPAC8C9.04		chromosome_1	Schizosaccharomyces specific protein	-1.06806	0.30291	-2.36881	0.0283071	-0.763562	0.458942
SPAC29A4.09		chromosome_1	rRNA exonuclease Rrp17 (predicted)	-0.2933	0.721745	-2.36452	0.00781884	-1.19215	0.156094
SPBPJ4664.04	cop1	chromosome_2	coatomer alpha subunit Cop1 (predicted)	-0.0329132	0.982573	-2.34976	0.128275	-1.6236	0.287118
SPCC1223.05c	rpl3702	chromosome_3	60S ribosomal protein L37 (predicted)	0.498423	0.70596	-2.33911	0.0858832	0.180892	0.890944
SPAC1F3.06c	spo15	chromosome_1	mitotic and mieotic spindle pole body protein Spo15	-0.669353	0.503413	-2.30776	0.0278788	-1.14113	0.258235
SPBC8D2.18c		chromosome_2	adenosylhomocysteinase (predicted)	-0.236987	0.792459	-2.30293	0.0162988	-0.11034	0.902441
SPBC4F6.13c	erb1	chromosome_2	WD repeat/BOP1NT protein Erb1 (predicted)	-0.0370071	0.962233	-2.14618	0.0105831	0.596828	0.447871
SPBC32F12.05c	cwf12	chromosome_2	Prp19 complex subunit Cwf12	0.113992	0.909196	-2.10507	0.043862	-0.928907	0.357007
SPCC1682.14	rpl1902	chromosome_3	60S ribosomal protein L19	2.33687	0.0233561	-2.10368	0.0392503	-1.9897	0.0501397
SPBC16E9.12c	pab2	chromosome_2	poly(A) binding protein Pab2	-1.24418	0.039439	-2.0898	0.00125179	0.170452	0.767825
SPBC646.07c	tsc13	chromosome_2	enoyl reductase (predicted)	-3.62768	0.00657822	-2.03508	0.107855	-0.281046	0.819468
SPBC11G11.05	rpa34	chromosome_2	DNA-directed RNA polymerase I complex subunit Rpa34 (predicted)	0.87752	0.220939	-2.02167	0.00798753	-1.4852	0.0439601
SPAC16C9.03	nmd3	chromosome_1	export adaptor Nmd3 (predicted)	1.3617	0.268259	-2.01668	0.106285	-1.44423	0.24108
SPBC83.17	mbf1	chromosome_2	transcriptional coactivator, multiprotein bridging factor Mbf1 (predicted)	-1.39048	0.00479076	-1.9931	0.000167631	-1.02983	0.0302432
SPAC26H5.12	rpo41	chromosome_1	mitochondrial RNA polymerase Rpo41	-0.2933	0.682116	-1.96807	0.0104099	1.08086	0.139714
SPAC1A6.02	wdr55	chromosome_1	WD repeat protein, human WDR55 family, involved in ribosome biogenesis (predicted)	-0.472697	0.480551	-1.93579	0.00729221	-1.26564	0.0670981
SPAC19A8.07c	imp4	chromosome_1	U3 snoRNP-associated protein Imp4 (predicted)	-0.2933	0.640357	-1.93235	0.00472389	0.258545	0.680301
SPAC959.08	rpl2102	chromosome_1	60S ribosomal protein L21 (predicted)	0.612655	0.235667	-1.92671	0.000829096	-1.158	0.030573
SPBC17G9.05	rct1	chromosome_2	cyclophilin family peptidyl-prolyl cis-trans isomerase, RRM-containing Rct1	0.37707	0.742282	-1.91768	0.103739	-0.690135	0.54836
SPAC17A2.02c		chromosome_1	ER protein, DUF887 family protein, implicated in lipid metabolism	-5.03863	2.93319e-05	-1.90874	0.0629113	-0.540584	0.585653
SPBC13E7.02	cwf24	chromosome_2	ubiquitin-protein ligase E3/GCN5-related N acetyltransferase fusion protein	-1.74769	0.0656221	-1.90275	0.04641	-2.08303	0.0305235
SPBC713.11c	pmp3	chromosome_2	plasma membrane proteolipid Pmp3 (predicted)	-0.2933	0.821912	-1.90021	0.153491	-0.0381799	0.976613
SPBC839.10	usp107	chromosome_2	U1 snRNP-associated protein Usp107	3.22548	0.0229983	-1.88982	0.167379	-1.14704	0.395971
SPBC31A8.01c	rtn1	chromosome_2	reticulon Rtn1	-1.73306	0.0050369	-1.88607	0.00260429	-0.459299	0.420817
SPBC18H10.11c	ppr2	chromosome_2	mitochondrial PPR repeat protein Ppr2	1.92504	0.0129923	-1.85375	0.0162773	0.0842576	0.907405
SPBC83.14c	rfc5	chromosome_2	DNA replication factor C complex subunit Rfc5	-0.2933	0.803818	-1.82153	0.13198	-1.88188	0.120235
SPAC19G12.09		chromosome_1	NADH/NADPH-dependent indole-3-acetaldehyde reductase, implicated in cellular detoxification	-2.5014	0.00014446	-1.8134	0.00322301	-2.3396	0.000302571
SPBC32H8.05		chromosome_2	UPF0642 conserved fungal protein	-0.289227	0.774587	-1.80895	0.0827134	-3.01185	0.00601696
SPAC589.10c	ubi5	chromosome_1	ribosomal-ubiquitin fusion protein Ubi5 (predicted)	-0.668932	0.122049	-1.80764	0.000231485	-0.241759	0.56769
SPAC2F3.04c	rim1	chromosome_1	mitochondrial single-stranded DNA binding protein Rim1	-1.55678	0.00432383	-1.78651	0.0013855	1.78324	0.00140843
SPAC31G5.21		chromosome_1	DUF1754 family, human FAM32A homolog, implicated in mRNA splicing	-0.2933	0.701201	-1.76605	0.028128	-0.768552	0.319095
SPCC306.03c	cnd2	chromosome_3	condensin complex non-SMC subunit Cnd2	-2.60787	0.000825695	-1.72632	0.0183031	-0.523271	0.449993
SPCC777.13	vps35	chromosome_3	retromer complex subunit Vps35	0.188415	0.66822	-1.72171	0.000584832	-1.41687	0.00332577
SPCC550.15c	rei1	chromosome_3	ribosome biogenesis protein Rei1 (predicted)	-0.106896	0.863293	-1.71665	0.0101047	-0.87497	0.167256
SPAC664.05	rpl13	chromosome_1	60S ribosomal protein L13 (predicted)	0.441715	0.528758	-1.70389	0.0212894	-0.746662	0.290721
SPBC16E9.13	ksp1	chromosome_2	serine/threonine protein kinase Ksp1 (predicted)	0.302238	0.736147	-1.69535	0.0679673	-0.253084	0.777742
SPAPJ696.02	lsb4	chromosome_1	actin cortical patch component Lsb4 (predicted)	-1.53352	0.073853	-1.68789	0.0506971	-3.96059	6.58962e-05
SPAC31G5.01	sap49	chromosome_1	U2 snRNP-associated RNA-binding protein Sap49	0.656439	0.685665	-1.66767	0.308385	-1.07113	0.510202
SPBC19C2.01	cdc28	chromosome_2	ATP-dependent RNA helicase Cdc28	-1.76762	0.000463201	-1.66645	0.00082989	0.288878	0.51356
SPBC409.15	tsr2	chromosome_2	rRNA processing protein Tsr2 (predicted)	0.553164	0.467159	-1.65109	0.0373417	-1.22292	0.115515
SPAC1071.10c	pma1	chromosome_1	plasma membrane P-type proton exporting ATPase, P3-type Pma1	-0.832175	0.265658	-1.6416	0.0340865	0.0610464	0.934053
SPBC887.03c	noc3	chromosome_2	Noc2p-Noc3p complex subunit Noc3	-0.2933	0.664317	-1.63608	0.0219935	0.336607	0.618683
SPBC1685.09	rps29	chromosome_2	40S ribosomal protein S29 (predicted)	-0.0291278	0.966156	-1.63428	0.0242985	-1.87988	0.0107762
SPAC19D5.05c	imp3	chromosome_1	U3 snoRNP-associated protein Imp3 (predicted)	-0.724682	0.312716	-1.61835	0.0303327	1.36352	0.0642599
SPAC3G9.15c	fcf2	chromosome_1	rRNA processing protein Fcf2 (predicted)	-0.246882	0.821771	-1.60467	0.151904	0.691221	0.529757
SPAC19B12.11c	bud20	chromosome_1	zinc finger ribosome biogenesis protein Bud20 (predicted)	-0.519044	0.387978	-1.59012	0.0127473	-0.251615	0.673711
SPBC1773.09c	mug184	chromosome_2	DNAJ domain protein, exocytosis associated Mug184 (predicted)	0.984028	0.722062	-1.58517	0.567478	-3.88953	0.167814
SPBC13G1.09	enp1	chromosome_2	bystin family U3 and U14 snoRNA associated protein Enp1 (predicted)	-1.77667	0.132797	-1.5128	0.197646	-1.59793	0.174444
SPBC839.13c	rpl1601	chromosome_2	60S ribosomal protein L13/L16 (predicted)	-0.2933	0.53489	-1.50321	0.00362935	0.0633981	0.892876
SPBC2G5.05		chromosome_2	transketolase (predicted)	-0.645148	0.197144	-1.49143	0.00532663	0.169195	0.730898
SPBC337.12	red5	chromosome_2	NURS complex subunit Red5	1.26129	0.0742368	-1.4894	0.0373816	-0.867825	0.211222
SPBC29B5.03c	rpl26	chromosome_2	60S ribosomal protein L26 (predicted)	0.486371	0.319229	-1.48202	0.00492994	-0.759657	0.125288
SPBC211.02c	cwf3	chromosome_2	Prp19 complex subunit Cwf3	-0.2933	0.74838	-1.46668	0.117839	0.461983	0.613953
SPCC1322.15	rpl3402	chromosome_3	60S ribosomal protein L34	0.127079	0.819985	-1.44497	0.0152136	-0.617916	0.274401
SPAC328.05	hrb1	chromosome_1	RNA-binding protein involved in export of mRNAs Hrb1 (predicted)	-1.19762	0.0489236	-1.42527	0.0210852	-1.39774	0.02342
SPAC4G9.17c	mrp5	chromosome_1	mitochondrial ribosomal protein subunit S5 (predicted)	2.04953	0.0559428	-1.42038	0.176553	-0.201059	0.845369
SPBC20F10.09	lsm5	chromosome_2	Lsm2-8 complex subunit Lsm5	-0.417963	0.791647	-1.41968	0.373278	-2.18538	0.175366
SPCC297.06c		chromosome_3	conserved fungal protein	-0.2933	0.746091	-1.39902	0.13139	-0.499339	0.582257
SPAC10F6.06	vip1	chromosome_1	RNA-binding protein Vip1	-0.596824	0.275081	-1.38641	0.0159552	0.310241	0.566877
SPCC794.12c	mae2	chromosome_3	malic enzyme, malate dehydrogenase (oxaloacetate decarboxylating), Mae2	0.856154	0.268459	-1.3492	0.0869299	0.0620692	0.935214
SPBC16H5.10c	prp43	chromosome_2	ATP-dependent RNA helicase Prp43	0.731816	0.40538	-1.3415	0.133686	-0.171859	0.844002
SPAC4F8.04		chromosome_1	Brix domain protein Rpf1 (predicted)	0.137695	0.835652	-1.30831	0.0578933	-1.51071	0.0304789
SPAC1B9.03c		chromosome_1	RNA-binding protein involved in ribosomal large subunit assembly and maintenance (predicted)	-0.339931	0.520404	-1.29927	0.020028	0.390576	0.460854
SPBC32F12.03c	gpx1	chromosome_2	glutathione peroxidase Gpx1	-0.0823928	0.888084	-1.29621	0.0348921	-2.33634	0.000493011
SPAC2F3.09	hem1	chromosome_1	5-aminolevulinate synthase Hem1	1.53402	0.00336611	-1.28956	0.0114974	-1.44433	0.00532197
SPAC19A8.15	trp2	chromosome_1	tryptophan synthase (predicted)	-0.319572	0.52285	-1.28755	0.01533	-0.50016	0.320319
SPAC1639.01c	elo1	chromosome_1	fatty acid elongase Elo1 (predicted)	-3.12945	0.00963748	-1.28716	0.258344	-1.73088	0.132631
SPCC417.11c		chromosome_3	glutamate-1-semialdehyde 2,1-aminomutase (predicted)	-0.2933	0.44469	-1.28484	0.00235677	0.501758	0.196271
SPAC13G6.02c	rps101	chromosome_1	40S ribosomal protein S3a	-0.0276728	0.96368	-1.28439	0.043215	-1.08645	0.083502
SPAPB1A10.09	ase1	chromosome_1	antiparallel microtubule cross-linking factor Ase1	0.633655	0.54777	-1.28365	0.228782	-2.19595	0.0452822
SPBC1711.04	mtd1	chromosome_2	methylenetetrahydrofolate reductase Mtd1 (predicted)	0.131013	0.880299	-1.27136	0.152785	-2.81408	0.00327718
SPAC24H6.07	rps901	chromosome_1	40S ribosomal protein S9	-2.63461	0.136928	-1.26956	0.465471	-0.937064	0.589118
SPBC3E7.13c	syf2	chromosome_2	Prp19 complex subunit Syf2	-1.11932	0.263957	-1.25785	0.210924	-0.371282	0.707668
SPAC343.02	img1	chromosome_1	mitochondrial ribosomal protein subunit L19 (predicted)	0.00522204	0.992842	-1.2529	0.0398172	-0.480787	0.412206
SPAC30.04c	abc4	chromosome_1	vacuolar phytochelatin and glutathione S-conjugate ABC family transmembrane transporter Abc4	-3.30969	0.000214105	-1.2338	0.11698	-1.19656	0.127866
SPBC106.18	rpl2501	chromosome_2	60S ribosomal protein L25 (predicted)	0.746461	0.183609	-1.23314	0.0330975	-1.06554	0.0624444
SPCC1840.02c	bgs4	chromosome_3	secondary septum 1,6 branched 1,3-beta-glucan synthase catalytic subunit Bgs4	-4.25923	0.000230273	-1.23216	0.222002	-0.519495	0.601875
SPBC29A3.12	rps902	chromosome_2	40S ribosomal protein S9 (predicted)	0.570772	0.6293	-1.23019	0.302482	-3.49504	0.00633658
SPBC119.08	pmk1	chromosome_2	MAP kinase Pmk1	-0.193089	0.837483	-1.21335	0.205032	0.232515	0.80495
SPBC776.08c	utp22	chromosome_2	small-subunit processome, UTP-C complex subunit Utp22 (predicted)	-0.00635953	0.992952	-1.2121	0.101946	1.88313	0.0143157
SPAC57A10.09c	nhp6	chromosome_1	High-mobility group non-histone chromatin protein (predicted)	-0.848407	0.0843883	-1.21075	0.0168683	-0.714059	0.142725
SPAC29B12.02c	set2	chromosome_1	histone lysine methyltransferase Set2	-0.655859	0.402603	-1.20952	0.12927	1.23988	0.120379
SPBC83.02c	rpl4302	chromosome_2	60S ribosomal protein L37a (predicted)	-1.7797	0.0199218	-1.20662	0.103689	-0.812518	0.265847
SPCC1739.03	hrr1	chromosome_3	Helicase Required for RNAi-mediated heterochromatin assembly Hrr1	-0.2933	0.681835	-1.20646	0.100832	-0.0589358	0.934233
SPAP8A3.04c	hsp9	chromosome_1	heat shock protein Hsp9	0.2374	0.507371	-1.19396	0.00247201	-1.97254	9.74051e-06
SPCC24B10.18		chromosome_3	DUF2462 family protein, human Leydig cell tumor 10 kDa protein homolog	-0.2933	0.730742	-1.19024	0.170606	-1.51785	0.0842561
SPAC1B3.09c	noc202	chromosome_1	Noc complex subunit Noc202 (predicted)	-0.2933	0.621305	-1.18668	0.0542465	0.512054	0.390953
SPAC890.08	rpl31	chromosome_1	60S ribosomal protein L31 (predicted)	0.062825	0.886547	-1.18206	0.0121997	-0.922898	0.0448023
SPCC1672.06c	asp1	chromosome_3	inositol hexakisphosphate kinase/inositol pyrophosphate synthase (predicted)	0.389079	0.610292	-1.17604	0.131731	-0.677103	0.377774
SPBC16A3.18	cip1	chromosome_2	RNA-binding protein Cip1	-1.05238	0.0289696	-1.15571	0.0175399	-0.69826	0.136172
SPCC1020.06c	tal1	chromosome_3	transaldolase (predicted)	-0.704043	0.374705	-1.15321	0.151521	0.443373	0.574199
SPAC13G7.01c	erg7	chromosome_1	lanosterol synthase Erg7	0.499956	0.486068	-1.15185	0.116243	-0.0246847	0.972421
SPAC25G10.01		chromosome_1	RNA-binding protein involved in histone acetylation	-0.807407	0.176118	-1.13862	0.0610583	0.712369	0.230655
SPAC1783.07c	pap1	chromosome_1	transcription factor Pap1/Caf3	-0.676761	0.352799	-1.13382	0.125559	-1.40446	0.0610014
SPBC119.13c	prp31	chromosome_2	U4/U6 x U5 tri-snRNP complex subunit Prp31	0.161507	0.797695	-1.12362	0.084031	-1.04476	0.106694
SPAC13G7.12c	eki1	chromosome_1	choline/ethanolamine kinase Eki1 (predicted)	-0.2933	0.674875	-1.11867	0.11848	-0.758678	0.282971
SPAC22A12.12c	rrp40	chromosome_1	exosome subunit Rrp40	-0.768656	0.313712	-1.11824	0.147467	2.22377	0.00659207
SPAC4F10.13c	mpd2	chromosome_1	GYF domain protein	1.34626	0.065928	-1.1136	0.124022	-0.204526	0.772157
SPBC651.11c	apm3	chromosome_2	AP-3 adaptor complex subunit Apm3 (predicted)	0.680038	0.419917	-1.07833	0.205563	-0.982742	0.247289
SPAC5D6.01	rps2202	chromosome_1	40S ribosomal protein S15a (predicted)	0.932255	0.0619684	-1.07189	0.033829	-1.08656	0.0316773
SPBP35G2.08c	air1	chromosome_2	TRAMP complex zinc knuckle subunit Air1	-0.120633	0.765997	-1.07098	0.0133884	0.140251	0.729418
SPBC336.10c	tif512	chromosome_2	translation elongation and termination factor eIF5A (predicted)	-2.4971	0.0171061	-1.06849	0.283539	0.432712	0.660807
SPBC32C12.02	ste11	chromosome_2	transcription factor Ste11	-0.2933	0.665606	-1.06103	0.126622	3.82105	7.44687e-06
SPBC800.06	brx1	chromosome_2	ribosome biogenesis protein Brx1 (predicted)	0.820259	0.311236	-1.05809	0.194637	-0.298353	0.709996
SPBC4F6.14	nop4	chromosome_2	RNA-binding protein Nop4 (predicted)	0.646502	0.286538	-1.05731	0.0873745	0.289753	0.629574
SPBC354.10	def1	chromosome_2	RNAPII degradation factor Def1 (predicted)	0.956879	0.0474124	-1.05481	0.0302279	-0.497794	0.287593
SPBC6B1.07	prp1	chromosome_2	U4/U6 x U5 tri-snRNP complex subunit Prp1	-0.478247	0.245645	-1.04724	0.0155475	1.39089	0.00204744
SPAC3C7.05c	mug191	chromosome_1	alpha-1,6- mannanase (predicted)	-1.24645	0.142363	-1.0457	0.215328	-1.87368	0.031825
SPCC663.04	rpl39	chromosome_3	60S ribosomal protein L39	-0.503372	0.81726	-1.03523	0.635256	-1.59452	0.466482
SPBC354.02c	sec61	chromosome_2	translocon alpha subunit Sec61	1.07373	0.125506	-1.03406	0.139386	-0.528744	0.441927
SPBC839.04	rpl803	chromosome_2	60S ribosomal protein L8 (predicted)	0.400959	0.45867	-1.02839	0.0653733	-0.866096	0.116904
SPAC1F7.01c	spt6	chromosome_1	nucleosome remodeling protein Spt6	-0.285884	0.694006	-1.02822	0.165087	1.61148	0.0343777
SPBC27B12.11c	pho7	chromosome_2	transcription factor Pho7	1.30873	0.201856	-1.02363	0.314914	-0.751604	0.458349
SPCC70.05c	nnk1	chromosome_3	serine/threonine protein kinase Nnk1 (predicted)	1.75046	0.0345237	-1.01766	0.204769	0.761385	0.339123
SPAPB17E12.13	rpl1802	chromosome_1	60S ribosomal protein L18 (predicted)	0.00657258	0.990654	-1.01514	0.0800863	-0.249352	0.657415
SPAC13A11.02c	erg11	chromosome_1	sterol 14-demethylase Erg11	-1.82426	0.106986	-1.01465	0.360792	-0.646313	0.558409
SPAC22F3.11c	snu23	chromosome_1	U4/U6 x U5 tri-snRNP complex subunit Snu23	-0.2933	0.532628	-1.01378	0.0386978	-0.88633	0.0678107
SPAC1B1.02c		chromosome_1	NAD/NADH kinase (predicted)	0.523214	0.60628	-1.01307	0.322047	-1.19483	0.244734
SPCC622.18	rpl6	chromosome_3	60S ribosomal protein L6 (predicted)	-0.302347	0.56038	-1.01067	0.060116	-0.630938	0.229861
SPAC7D4.07c	trx1	chromosome_1	cytosolic thioredoxin Trx1	-0.646382	0.184115	-1.00837	0.0433722	-0.16168	0.735217
SPBC19F5.02c	utp4	chromosome_2	U3 snoRNP-associated WD repeat protein Utp4 (predicted)	-1.4741	0.0275837	-1.00579	0.122444	-0.146093	0.818021
SPAC13D6.02c	byr3	chromosome_1	translational activator, zf-CCHC type zinc finger protein (predicted)	-1.02287	0.216154	-1.00091	0.225859	-0.54531	0.504683
SPAC1687.11	spb1	chromosome_1	rRNA methyltransferase Spb1 (predicted)	-1.26562	0.133287	-0.989366	0.236223	-0.307048	0.709411
SPAC1250.01	snf21	chromosome_1	RSC-type complex ATP-dependent DNA helicase Snf21	-0.840441	0.24681	-0.984404	0.177185	0.662661	0.358575
SPBC660.11	tcg1	chromosome_2	single-stranded telomeric binding protein Tgc1	-0.653747	0.125635	-0.974928	0.0264195	-0.458198	0.277001
SPBC1539.04	tts1	chromosome_2	tetra spanning protein 1, Tts1	-0.210216	0.67958	-0.974152	0.0646369	-0.654209	0.205624
SPBC16G5.04	mrpl23	chromosome_2	mitochondrial ribosomal protein subunit L13 (predicted)	0.584268	0.497619	-0.960078	0.268999	-0.0631708	0.941257
SPBC1604.05	pgi1	chromosome_2	glucose-6-phosphate isomerase (predicted)	-0.622128	0.372786	-0.951606	0.177575	0.336209	0.627984
SPBC685.07c	rpl2701	chromosome_2	60S ribosomal protein L27	0.498004	0.300771	-0.951351	0.0547208	-2.1836	0.00010695
SPAC18G6.14c	rps7	chromosome_1	40S ribosomal protein S7 (predicted)	0.176182	0.731775	-0.946897	0.0747374	-1.83702	0.00139936
SPAC1B3.13	nan1	chromosome_1	U3 snoRNP-associated protein Nan1 (predicted)	-1.50373	0.0176298	-0.946139	0.121727	-0.186258	0.754794
SPBC28F2.11	hmo1	chromosome_2	HMG box protein Hmo1	0.252904	0.665896	-0.941735	0.116711	-0.730384	0.21896
SPBC1718.07c	zfs1	chromosome_2	CCCH tandem zinc finger protein, human Tristetraprolin homolog Zfs1, involved in mRNA catabolism	-0.376237	0.42605	-0.936873	0.0551811	-0.681566	0.155469
SPAC23C4.19	spt5	chromosome_1	DSIF transcription elongation factor complex subunit Spt5	-0.202726	0.668161	-0.935298	0.0567768	0.745505	0.123673
SPBPJ4664.06	gpt1	chromosome_2	UDP-glucose-glycoprotein glucosyltransferase Gpt1	-1.21761	0.173255	-0.913709	0.302664	0.0462105	0.957949
SPAC644.13c		chromosome_1	Rab GTPase binding (predicted)	-1.27331	0.121643	-0.912269	0.261533	-0.884372	0.276016
SPBC19C2.13c	ctu2	chromosome_2	cytosolic thiouridylase subunit Ctu2	-0.48509	0.723768	-0.905068	0.511025	1.4428	0.298149
SPBC106.12c	tho4	chromosome_2	THO complex subunit Tho4 (predicted)	0.303572	0.737033	-0.904245	0.321744	-0.88032	0.334451
SPCC737.09c	hmt1	chromosome_3	vacuolar phytochelatin and glutathione S-conjugate ABC family transmembrane transporter Hmt1	-0.790149	0.282799	-0.903795	0.220968	0.0702827	0.922949
SPAC824.04	swd22	chromosome_1	mRNA cleavage and polyadenylation specificity factor complex, WD repeat protein Swd22	1.07686	0.0742177	-0.884874	0.138097	-0.312002	0.593472
SPBC3D6.12	dip2	chromosome_2	U3 snoRNA associated protein Dip2 (predicted)	0.885954	0.273809	-0.874125	0.280105	0.402752	0.615263
SPBC18H10.12c	rpl701	chromosome_2	RNase MRP subunit, ribosomal protein L7-like Rpl701	-0.0826804	0.842417	-0.873213	0.044414	-0.305956	0.46432
SPCC790.02	pep3	chromosome_3	HOPS/CORVET complex subunit, ubiquitin-protein ligase E3 Pep3/Vps18 (predicted)	-1.14324	0.284421	-0.867997	0.413966	-0.249433	0.813194
SPAC1705.02		chromosome_1	SERF family protein, DUF, human 4F5S homolog, implicated in mRNA splicing	-0.982743	0.167258	-0.866555	0.221242	-0.962371	0.175882
SPBC215.12	cwf10	chromosome_2	U5 snRNP GTPase subunit Cwf10	-0.385023	0.577522	-0.86031	0.219226	0.558349	0.42092
SPAC4F10.03c	trm7	chromosome_1	tRNA 2'-O-ribose methyltransferase Trm7 (predicted)	-0.2933	0.614265	-0.849549	0.152215	-1.57872	0.0112433
SPBC32H8.10	cdk9	chromosome_2	P-TEFb-associated cyclin-dependent protein kinase Cdk9	0.874952	0.14589	-0.844293	0.159908	0.496145	0.402403
SPAC9.07c		chromosome_1	GTPase Obg family, involved in cytoplasmic translation Rbg1 (predicted)	-0.602339	0.369867	-0.843241	0.213034	-0.207452	0.755648
SPACUNK4.16c	tps3	chromosome_1	alpha,alpha-trehalose-phosphate synthase (predicted)	0.674221	0.258675	-0.829388	0.167576	-1.23664	0.0444208
SPCPB16A4.03c	ade10	chromosome_3	bifunctional IMP cyclohydrolase/phosphoribosylaminoimidazolecarboxamideformyltransferase	-2.01116	0.0154102	-0.821515	0.296965	-0.0863711	0.911671
SPAC2C4.03c	smd2	chromosome_1	Sm snRNP core protein Smd2	0.0970665	0.871803	-0.81375	0.184278	-0.537932	0.375079
SPAC10F6.01c	sir1	chromosome_1	sulfite reductase beta subunit Sir1	-0.937564	0.205738	-0.801009	0.277468	-1.14792	0.124408
SPBP35G2.14	puf2	chromosome_2	pumilio family RNA-binding protein Puf2	0.823635	0.23196	-0.794799	0.248225	-0.412014	0.545279
SPAC25B8.16	pop100	chromosome_1	RNase P and RNase MRP subunit Pop100	-0.354665	0.42286	-0.788763	0.0823819	0.325881	0.460996
SPBC27.08c	sua1	chromosome_2	sulfate adenylyltransferase	-2.95653	0.00113576	-0.78864	0.333574	0.397434	0.623466
SPAC23H4.15	tsr1	chromosome_1	ribosome biogenesis protein Tsr1 (predicted)	-0.104816	0.892817	-0.78364	0.318845	-0.0919261	0.905929
SPBC11C11.07	rpl1801	chromosome_2	60S ribosomal protein L18	-1.09509	0.346657	-0.780617	0.500332	-0.199524	0.862611
SPAC1556.02c	sdh1	chromosome_1	succinate dehydrogenase Sdh1 (predicted)	-1.45331	0.197183	-0.777579	0.484667	-1.33263	0.235689
SPAC6F6.07c	rps13	chromosome_1	40S ribosomal protein S13	-0.206888	0.689092	-0.776904	0.141498	-1.15243	0.0335679
SPBC31F10.11c	cwf4	chromosome_2	Prp19 complex subunit Cwf4	-1.47086	0.146804	-0.772516	0.438599	-2.79484	0.00889419
SPCC550.02c	cwf5	chromosome_3	Prp19 complex subunit, RNA-binding Cwf5	-1.05039	0.578518	-0.770509	0.683168	-0.494857	0.793009
SPAC1527.03	lar1	chromosome_1	RNA-binding protein, LARP1 family Lar1 (predicted)	-1.68633	0.044984	-0.766792	0.345541	-0.334566	0.678316
SPBC16A3.08c	oga1	chromosome_2	Stm1 homolog Oga1	0.14226	0.744339	-0.762727	0.0897569	-0.432311	0.326148
SPBC19F5.05c	ppp1	chromosome_2	pescadillo-family BRCT domain protein Ppp1 (predicted)	1.0301	0.197239	-0.759459	0.337879	0.859312	0.279505
SPCC1753.01c	ssb2	chromosome_3	single-stranded DNA binding protein Ssb2	0.419822	0.597323	-0.756768	0.344184	-0.993331	0.217484
SPAC31A2.07c	dbp10	chromosome_1	ATP-dependent RNA helicase Dbp10 (predicted)	0.345223	0.562859	-0.755886	0.211231	-0.195089	0.743084
SPBC1271.03c		chromosome_2	NLI interacting factor family phosphatase (predicted)	0.948656	0.146888	-0.751676	0.24648	-0.878878	0.177622
SPAC11G7.03	idh1	chromosome_1	isocitrate dehydrogenase (NAD+) subunit 1 Idh1	-0.533874	0.327387	-0.747501	0.174402	-1.11031	0.0485276
SPAC22F3.08c	rok1	chromosome_1	ATP-dependent RNA helicase Rok1 (predicted)	0.4027	0.477304	-0.744245	0.19471	0.710198	0.215196
SPAC26A3.04	rpl2002	chromosome_1	60S ribosomal protein L20 (predicted)	0.832319	0.102172	-0.74292	0.142338	-0.647721	0.198412
SPBC800.09	sum2	chromosome_2	translation initiation inhibitor (predicted)	0.422722	0.324878	-0.742607	0.0902476	-0.564292	0.192292
SPCC330.09	enp2	chromosome_3	rRNA processing protein Enp2 (predicted)	1.65242	0.0896579	-0.742315	0.434531	0.155407	0.869234
SPAC1F12.10c		chromosome_1	NADPH-hemoprotein reductase (predicted)	2.56239	0.0254982	-0.739871	0.497939	0.560475	0.606915
SPBC36.03c	mfs3	chromosome_2	plasma membrane spermidine transmembrane transporter Mfs3	-1.95225	0.00467934	-0.734522	0.251812	0.31317	0.621126
SPBC365.03c	rpl2101	chromosome_2	60S ribosomal protein L21 (predicted)	-2.3047	0.099987	-0.733928	0.590766	-0.147035	0.913956
SPAC25B8.12c		chromosome_1	HAD superfamily hydrolase, unknown role	0.313955	0.626163	-0.727912	0.263913	0.197089	0.759394
SPAC222.17		chromosome_1	conserved fungal protein	-0.735728	0.585869	-0.727485	0.590049	-2.30197	0.0969439
SPAC1002.17c	urg2	chromosome_1	uracil phosphoribosyltransferase (predicted)	-1.07603	0.256537	-0.726536	0.440212	-0.292645	0.754614
SPAC6F6.03c	nog2	chromosome_1	ribosome export GTPase Nog2 (predicted)	1.13502	0.0127701	-0.723548	0.0990069	0.00604734	0.98867
SPBC119.02	ubc4	chromosome_2	ubiquitin conjugating enzyme E2 for APC and SCF Ubc4/UbcP1	2.96719	0.026461	-0.722365	0.569916	-1.14873	0.368745
SPAC1071.02	mms19	chromosome_1	CIA machinery protein Mms19	-0.912295	0.249427	-0.707476	0.369081	0.125024	0.872828
SPCC613.05c	rpl35	chromosome_3	60S ribosomal protein L35	0.21046	0.690385	-0.701938	0.191378	-0.626451	0.241887
SPCC23B6.02c		chromosome_3	pre-ribosomal factor (predicted)	-0.2933	0.571326	-0.700675	0.183083	-0.198281	0.701411
SPAC4D7.05	sum1	chromosome_1	translation initiation factor eIF3i	-0.684602	0.273714	-0.699506	0.263671	-1.8456	0.00595582
SPBC365.12c	ish1	chromosome_2	nuclear envelope LEA domain protein Ish1	-1.97691	0.00485275	-0.693485	0.286745	-2.23427	0.00181511
SPAC23H4.09	cdb4	chromosome_1	endonuclease Cdb4 (predicted)	0.246331	0.575742	-0.687653	0.12642	-0.970349	0.0350835
SPAC1093.05		chromosome_1	ATP-dependent RNA helicase Hca4 (predicted)	-0.2933	0.513757	-0.685825	0.134343	1.97277	0.000168386
SPAC26F1.13c	lrs1	chromosome_1	cytoplasmic leucine-tRNA ligase Lrs1 (predicted)	-0.373504	0.466371	-0.67838	0.191469	-0.809839	0.121689
SPBC29A3.04	rpl8	chromosome_2	60S ribosomal protein L7a/L8 (predicted)	0.861083	0.0748323	-0.675113	0.157145	-0.721591	0.131639
SPAC22H12.04c	rps102	chromosome_1	40S ribosomal protein S3a (predicted)	0.219143	0.57483	-0.674554	0.092892	-0.314285	0.422752
SPCC417.07c	mto1	chromosome_3	gamma tubulin complex linker Mto1	-0.908695	0.050511	-0.66165	0.146779	-0.209241	0.639553
SPAC18G6.07c	mra1	chromosome_1	rRNA (pseudouridine) methyltransferase Mra1	-0.0869238	0.852367	-0.656423	0.168395	-0.944456	0.0521887
SPBC1347.02	ani1	chromosome_2	CENP-A amino terminus domain (NTD) isomerase Ani1	-0.726606	0.259869	-0.653227	0.309854	-0.23221	0.715476
SPCC1795.11	sum3	chromosome_3	translation initiation RNA helicase Sum3	-0.514364	0.31686	-0.65183	0.207524	-0.289591	0.570256
SPBC660.13c	ssb1	chromosome_2	DNA replication factor A subunit Ssb1	0.409281	0.672971	-0.649855	0.503982	0.0492588	0.95941
SPCC1183.08c	rpl101	chromosome_3	60S ribosomal protein L10a	-0.625657	0.269436	-0.637178	0.260945	-0.831418	0.146112
SPCC757.08	rrp45	chromosome_3	exosome subunit Rrp45	-1.16136	0.0406445	-0.636796	0.246855	1.42471	0.0138955
SPBC25H2.10c	tan1	chromosome_2	tRNA acetyltransferase Tan1 (predicted)	0.49117	0.570065	-0.634151	0.464404	0.5412	0.531743
SPBC2A9.11c	iss9	chromosome_2	SAC3/GANP/THP3 family protein, human LENG8 ortholog	1.12744	0.122318	-0.631501	0.378474	-0.0739288	0.917205
SPBC146.13c	myo1	chromosome_2	myosin type I	0.639063	0.339357	-0.631476	0.345012	-0.253477	0.702384
SPBC17G9.03c	krs1	chromosome_2	cytoplasmic lysine-tRNA ligase Krs1 (predicted)	-0.560262	0.163363	-0.631307	0.118261	-0.514682	0.198956
SPAC16C9.04c	mot2	chromosome_1	CCR4-Not complex ubiquitin-protein ligase E3 subunit Mot2	-1.06659	0.300888	-0.626939	0.540097	-0.11951	0.906666
SPAC13G6.07c	rps601	chromosome_1	40S ribosomal protein S6	-0.2933	0.43377	-0.626909	0.101832	-0.260261	0.486712
SPBC26H8.03	cho2	chromosome_2	phosphatidylethanolamine N-methyltransferase Cho2	-3.89144	0.000654246	-0.62608	0.534174	0.260039	0.795569
SPAC1F7.02c	has1	chromosome_1	ATP-dependent RNA helicase Has1 (predicted)	-1.59277	0.0488646	-0.625548	0.422902	0.882079	0.261639
SPAC12G12.02	efg1	chromosome_1	rRNA processing protein Efg1 (predicted)	-0.372001	0.33137	-0.619808	0.11166	-0.0506778	0.893677
SPAC222.13c		chromosome_1	6-phosphofructo-2-kinase (predicted)	-0.0143207	0.98669	-0.617989	0.474031	-1.04378	0.231214
SPCC162.07	ent1	chromosome_3	epsin	-2.09716	0.141632	-0.617433	0.658485	-0.27999	0.840877
SPCC1322.11	rpl2302	chromosome_3	60S ribosomal protein L23	-0.236228	0.727799	-0.615826	0.367783	-2.16832	0.00358294
SPBC1289.02c	uap2	chromosome_2	U2 snRNP-associated protein Uap2	-0.411567	0.434432	-0.615149	0.246432	-0.560436	0.289819
SPCC645.08c	snd1	chromosome_3	RNA-binding protein, involved in chromatin silencing by small RNA, Snd1	-0.1361	0.72927	-0.611783	0.128679	-0.49869	0.21181
SPBC2D10.19c	alb1	chromosome_2	pre-60S shuttling factor Alb1 (predicted)	-0.2933	0.493914	-0.609937	0.161558	-0.122491	0.774199
SPAC3H5.07	rpl702	chromosome_1	60S ribosomal protein L7b involved in cytoplasmic translation	-1.12402	0.112192	-0.608805	0.380555	0.62895	0.365257
SPBP4H10.13	rps2302	chromosome_2	40S ribosomal protein S23 (predicted)	-0.220266	0.676273	-0.607039	0.255555	-1.09502	0.046387
SPCC162.01c	snp27	chromosome_3	U4/U6 x U5 tri-snRNP complex subunit (predicted)	0.131812	0.736691	-0.604765	0.131787	-0.326812	0.407366
SPCC18.03		chromosome_3	shuttle craft like transcriptional repressor/ubiquitin-protein ligase E3 (predicted)	0.399121	0.276526	-0.60308	0.1055	-0.0406372	0.910665
SPBC16E9.16c	lsd90	chromosome_2	Lsd90 protein	-4.07869	0.000434642	-0.599324	0.554157	0.794613	0.434162
SPBC1778.01c	zuo1	chromosome_2	ribosome-associated chaperone, zuotin (predicted)	-1.12941	0.117463	-0.598317	0.398044	-2.58067	0.0011029
SPAC1805.11c	rps2602	chromosome_1	40S ribosomal protein S26 (predicted)	-0.126593	0.748796	-0.596561	0.140059	-0.948116	0.0232304
SPCC126.13c	sap18	chromosome_3	splicing factor Sap18 (predicted)	-1.09837	0.0891235	-0.593123	0.348091	-0.342252	0.58586
SPAC17H9.13c	pro2	chromosome_1	glutamate 5-kinase Pro2	-0.270366	0.838191	-0.59025	0.65627	1.434	0.284485
SPBC713.02c	ubp15	chromosome_2	ubiquitin C-terminal hydrolase Ubp15	0.632159	0.543137	-0.588174	0.571348	-1.69018	0.112218
SPBC28F2.03	ppi1	chromosome_2	cyclophilin family peptidyl-prolyl cis-trans isomerase Cyp2	-0.83779	0.0962983	-0.587754	0.236343	-0.477058	0.334024
SPCC1827.05c		chromosome_3	nucleolar RNA-binding protein NIFK (predicted)	0.725582	0.292535	-0.582851	0.395847	-0.0135607	0.984117
SPBC18H10.04c	sce3	chromosome_2	translation initiation factor (predicted)	-0.116501	0.786858	-0.582645	0.184234	-0.0814486	0.850005
SPBC29A3.16	rrs1	chromosome_2	ribosome biogenesis protein Rrs1	-0.64526	0.356643	-0.572623	0.412451	0.230457	0.740004
SPAC806.07	ndk1	chromosome_1	nucleoside diphosphate kinase Ndk1	-0.812066	0.243427	-0.570804	0.408837	-0.639281	0.355835
SPBC18H10.03	tif35	chromosome_2	translation initiation factor eIF3g	-0.0902638	0.846864	-0.566352	0.232584	-0.470351	0.319233
SPBC365.14c	uge1	chromosome_2	UDP-glucose 4-epimerase Uge1	-0.114513	0.85579	-0.564263	0.374407	0.110902	0.860287
SPBC28F2.12	rpb1	chromosome_2	RNA polymerase II large subunit Rpb1	0.040059	0.948253	-0.5622	0.366566	0.734075	0.241247
SPCC1494.06c	dbp9	chromosome_3	ATP-dependent RNA helicase Dbp9 (predicted)	-0.0770416	0.92696	-0.558952	0.507957	0.62581	0.459099
SPAC4F10.14c	btf3	chromosome_1	nascent polypeptide-associated complex beta subunit	-0.949622	0.080843	-0.55391	0.29818	-0.665003	0.213955
SPAC18G6.06	utp11	chromosome_1	U3 snoRNP-associated protein Utp11 (predicted)	0.12274	0.768404	-0.550747	0.194058	0.897591	0.0395667
SPAC4F10.09c	noc1	chromosome_1	ribosome biogenesis protein Noc1 (predicted)	0.781879	0.477992	-0.548419	0.617751	0.98456	0.373102
SPAC12G12.03	cip2	chromosome_1	RNA-binding protein Cip2	-0.0183269	0.977239	-0.546863	0.39821	-0.373646	0.562197
SPCC18.12c	utp23	chromosome_3	rRNA processing protein Utp23 (predicted)	0.876019	0.037071	-0.545526	0.18175	-0.710605	0.0858898
SPAC2E1P5.03	erj5	chromosome_1	endoplasmic reticulum DNAJ domain protein Erj5 (predicted)	0.328447	0.746295	-0.536365	0.597951	1.09491	0.286161
SPAC1834.03c	hhf1	chromosome_1	histone H4 h4.1	-0.50015	0.444654	-0.527392	0.420571	-0.132624	0.838456
SPBC691.04	mss116	chromosome_2	mitochondrial ATP-dependent RNA helicase Mss116 (predicted)	1.56783	0.0345478	-0.526197	0.459066	0.274476	0.698122
SPCC576.11	rpl15	chromosome_3	60S ribosomal protein L15 (predicted)	-0.466952	0.321471	-0.525454	0.265888	-0.492881	0.295906
SPAC10F6.13c	caa1	chromosome_1	cytoplasmic aspartate aminotransferase Caa1 (predicted)	-1.06252	0.163147	-0.523696	0.485005	0.232745	0.755316
SPBC16G5.14c	rps3	chromosome_2	40S ribosomal protein S3 (predicted)	0.577425	0.149643	-0.514378	0.197306	-0.773739	0.0576153
SPAC1687.22c	puf3	chromosome_1	pumilio family RNA-binding protein Puf3 (predicted)	-0.161428	0.865872	-0.512158	0.593065	-1.86663	0.0600957
SPAC821.06	spn2	chromosome_1	mitotic and meiotic (sporulation) septin Spn2	0.239615	0.812026	-0.505023	0.616945	0.130087	0.897227
SPAC22E12.17c	glo3	chromosome_1	ARF GTPase activating protein (predicted)	-1.06122	0.0394807	-0.501091	0.313854	-0.360744	0.466084
SPBC14C8.03	fma2	chromosome_2	methionine aminopeptidase Fma2 (predicted)	-0.263164	0.566057	-0.500684	0.279272	-0.849744	0.0725528
SPCC825.01		chromosome_3	ATPase, involved in cytoplasmic translational initiation (predicted)	0.303982	0.616845	-0.500072	0.412585	0.507922	0.405394
SPAC513.01c	eft201	chromosome_1	translation elongation factor 2 (EF-2) Eft2,A	0.0636583	0.890351	-0.495412	0.289059	-0.237332	0.60821
SPBC23G7.07c	cms1	chromosome_2	U3-containing 90S preribosome complex subunit Cms1 (predicted)	-0.0192437	0.983291	-0.495387	0.590935	-1.12749	0.227068
SPBC23E6.05	arx1	chromosome_2	ribosomal export complex protein Arx1, peptidase family (predicted)	0.129037	0.840144	-0.491965	0.444539	-0.880183	0.177117
SPAC2F7.13c	wrs1	chromosome_1	cytoplasmic tryptophan-tRNA ligase Wrs1 (predicted)	0.671029	0.444982	-0.486448	0.578657	0.37143	0.671112
SPAC16A10.02	sub1	chromosome_1	transcription coactivator PC4	-0.191234	0.856442	-0.485656	0.646558	-0.713864	0.501411
SPAC17H9.02	mtl1	chromosome_1	TRAMP/MTREC complex subunit, ATP-dependent RNA helicase (predicted)	-3.8217	6.79473e-05	-0.477818	0.552643	2.80566	0.00170297
SPAC1486.09	nob1	chromosome_1	ribosome biogenesis protein Nob1 (predicted)	0.602146	0.271897	-0.475583	0.383225	-0.524758	0.336829
SPAC25B8.03	psd2	chromosome_1	phosphatidylserine decarboxylase Psd2	-1.19617	0.189316	-0.471666	0.599076	-1.15778	0.2034
SPAC6G9.07c	arc4	chromosome_1	ARP2/3 actin-organizing complex subunit Arc4	1.07854	0.0246294	-0.468786	0.307455	-0.499284	0.277757
SPAC3H1.09c	avt3	chromosome_1	vacuolar amino acid transmembrane transporter Avt3	-2.75652	0.00117997	-0.463272	0.541607	0.62626	0.410828
SPAC16C9.06c	upf1	chromosome_1	ATP-dependent RNA helicase Upf1	0.666619	0.551639	-0.461809	0.679445	-3.99746	0.00138206
Pombase:NA	Hb-sod	not_annotated	NA	-0.698711	0.151787	-0.460872	0.338512	-0.90866	0.0661826
SPBC25D12.04	suc22	chromosome_2	ribonucleotide reductase small subunit Suc22	2.29642	3.32683e-07	-0.455522	0.178133	0.113439	0.732706
SPBC2G2.11	myr1	chromosome_2	N-myristoyltransferase Myr1 (predicted)	-0.0476125	0.963947	-0.45004	0.669797	0.160485	0.878932
SPAC4F8.03	sdo1	chromosome_1	SBDS family ribosome assembly protein Sdo1 (predicted)	0.269095	0.658289	-0.44332	0.467817	-1.6423	0.0116502
SPAC26F1.01	sec74	chromosome_1	guanyl-nucleotide exchange factor Sec74 (predicted)	-0.2933	0.501336	-0.441113	0.31481	-0.269155	0.536901
SPBC12C2.06	dbp5	chromosome_2	cytoplasmic ATP-dependent RNA helicase Dbp5 (predicted)	-0.951421	0.0206075	-0.439058	0.263707	-0.343266	0.379757
SPBC342.02	qrs1	chromosome_2	cytoplasmic glutaminyl-tRNA ligase Qrs1 (predicted)	0.240953	0.710454	-0.434837	0.504289	-1.01245	0.127631
SPBC660.16	gnd1	chromosome_2	phosphogluconate dehydrogenase, decarboxylating	-0.452598	0.210342	-0.432654	0.230477	-0.197778	0.578976
SPAC15E1.08	naa10	chromosome_1	NatA N-acetyltransferase complex catalytic subunit Naa10 (predicted)	0.562583	0.616221	-0.422917	0.706007	-1.34544	0.236457
SPBC646.08c		chromosome_2	sterol intermembrane transfer protein (predicted)	-0.0640339	0.905195	-0.422156	0.435276	-0.673821	0.217541
SPBC211.08c	mtr3	chromosome_2	exosomal 3'-5' exoribonuclease, PH-like Mtr3	-0.203583	0.830431	-0.421489	0.658018	1.61108	0.0996649
SPCC576.08c	rps2	chromosome_3	40S ribosomal protein S2 (predicted)	0.0481214	0.902171	-0.418901	0.290333	-0.500315	0.208895
SPBC17G9.06c		chromosome_2	siderophore-iron biosynthesis protein (predicted)	-0.175762	0.743468	-0.417933	0.438888	-0.566739	0.296423
SPAC9E9.04		chromosome_1	bcap family homolog, implicated in vesicle-mediated transport (predicted)	-0.893413	0.212754	-0.416818	0.555896	-0.460002	0.516052
SPBC839.16	thf1	chromosome_2	C1-5,6,7,8-tetrahydrofolate (THF) synthase, trifunctional enzyme Thf1	0.39603	0.355356	-0.41457	0.333703	-0.470548	0.273911
SPBC25H2.02	trs1	chromosome_2	cytoplasmic threonine-tRNA ligase Trs1 (predicted)	-0.288032	0.755968	-0.410371	0.658265	-2.00568	0.0386605
SPACUNK4.10	gor1	chromosome_1	glyoxylate reductase (predicted)	-0.0291459	0.949928	-0.4102	0.380717	-0.00463914	0.992025
SPBC3H7.15	hhp1	chromosome_2	serine/threonine protein kinase Hhp1	1.02611	0.113539	-0.409751	0.518034	-0.428196	0.49955
SPAC24C9.10c	mrp4	chromosome_1	mitochondrial ribosomal protein subunit S2 (predicted)	-0.986896	0.233418	-0.405955	0.619608	-1.01648	0.220118
SPCC16C4.07	scw1	chromosome_3	RNA-binding protein Scw1	1.65907	0.0240368	-0.404812	0.56193	-0.146006	0.833791
SPAC17G6.11c		chromosome_1	sphingolipid biosynthesis protein (predicted)	-2.72836	0.158906	-0.404455	0.831126	0.249203	0.89543
SPBC1539.10	nop16	chromosome_2	ribosome biogenesis protein Nop16 (predicted)	0.105574	0.92453	-0.400618	0.719594	0.700931	0.53109
SPBC16G5.11c	bag101	chromosome_2	BAG family molecular chaperone regulator Bag101 (predicted)	-0.865025	0.319076	-0.400438	0.641853	-1.48711	0.0931125
SPAC17H9.04c	nrp1	chromosome_1	nucleolar RNA-binding protein, human TEX13A and TEX13B ortholog, implicated in mRNA processing	0.297643	0.675396	-0.395701	0.578271	-0.00228558	0.99743
SPCC594.01		chromosome_3	DUF1769 family protein	-0.77756	0.393725	-0.393653	0.664073	-1.23213	0.181517
SPAC521.05	rps802	chromosome_1	40S ribosomal protein S8 (predicted)	0.435569	0.422273	-0.393611	0.46778	-0.843369	0.127083
SPCC1223.08c	dfr1	chromosome_3	dihydrofolate reductase/ serine hydrolase family fusion protein Dfr1	-0.145009	0.746837	-0.389834	0.388748	-1.20243	0.0123481
SPAC30D11.03	ddx27	chromosome_1	ATP-dependent RNA helicase Ddx27/Drs1 (predicted)	-2.2889	0.0133002	-0.385029	0.656734	3.95842	0.000110017
SPCC417.08	tef3	chromosome_3	translation elongation factor eEF3	0.0299751	0.93737	-0.383176	0.32028	-0.453221	0.241716
SPAC1F3.04c	tsr3	chromosome_1	SSU-rRNA maturation protein Tsr3 (predicted)	0.12778	0.920517	-0.382706	0.765246	0.0779774	0.951442
SPBC21B10.10	rps402	chromosome_2	40S ribosomal protein S4 (predicted)	1.20924	0.0186251	-0.382634	0.432002	-0.845708	0.0901274
SPAC14C4.06c	nab2	chromosome_1	poly(A) binding protein Nab2 (predicted)	0.345523	0.722486	-0.37849	0.697337	0.218777	0.821942
SPAPJ698.02c	rps002	chromosome_1	40S ribosomal protein S0B	0.804454	0.0264437	-0.376032	0.279629	-1.0965	0.00363909
SPBC1685.10	rps27	chromosome_2	40S ribosomal protein S27 (predicted)	1.06662	0.0399319	-0.37466	0.452645	-1.70286	0.00200599
SPAC644.12	cdc5	chromosome_1	Prp19 complex subunit Cdc5	-1.00712	0.0853345	-0.370823	0.514926	0.564666	0.324256
SPBC2F12.12c	cay1	chromosome_2	cactin, spliceosome complex subunit	0.234525	0.802333	-0.369076	0.693908	-0.691002	0.463068
SPCC11E10.04	ppr6	chromosome_3	mitochondrial PPR repreat protein Ppr6	3.07445	0.0144347	-0.364402	0.757116	-0.731827	0.535793
SPBC56F2.02	rpl1901	chromosome_2	60S ribosomal protein L19	0.315481	0.614647	-0.356761	0.569426	-0.959175	0.13412
SPAC13D6.03c	trm9	chromosome_1	tRNA (uridine) methyltransferase Trm9 (predicted)	0.839958	0.342396	-0.356273	0.684803	0.458084	0.602146
SPBC1778.06c	fim1	chromosome_2	fimbrin	-0.544034	0.174479	-0.35343	0.372257	-0.588193	0.14335
SPAC8F11.04		chromosome_1	U3 snoRNP-associated protein Cic1/Utp30 family (predicted)	1.81231	0.0143027	-0.346055	0.618354	-0.00931819	0.989268
SPAC19G12.07c	rsd1	chromosome_1	RNA-binding protein Rsd1 (predicted)	0.397714	0.697908	-0.343373	0.737437	1.44525	0.166407
SPAC3G9.09c	tif211	chromosome_1	translation initiation factor eIF2 alpha subunit	-0.220903	0.661407	-0.342496	0.498342	-0.781398	0.129927
SPCC16C4.11	pef1	chromosome_3	Pho85/PhoA-like cyclin-dependent kinase Pef1	-1.1096	0.358547	-0.33968	0.776882	-0.453247	0.705522
SPBC119.10	asn1	chromosome_2	asparagine synthetase	0.416203	0.544933	-0.335011	0.625586	-0.373587	0.58658
SPBC26H8.11c		chromosome_2	acyl-coenzyme A thioesterase	-0.325992	0.678414	-0.334964	0.670111	0.974759	0.221619
SPAC23H4.01c	osh3	chromosome_1	sterol intermembrane transfer protein Osh3	0.284628	0.601857	-0.333838	0.541023	-0.430911	0.431324
SPAC16.02c	srp2	chromosome_1	splicing factor Srp2	-0.224292	0.513281	-0.331611	0.336364	0.378381	0.274067
SPBC1A4.03c	top2	chromosome_2	DNA topoisomerase II	-0.359949	0.672146	-0.328684	0.699076	-0.377769	0.656992
SPAC1805.13	rpl14	chromosome_1	60S ribosomal protein L14 (predicted)	1.36565	0.0149591	-0.323182	0.540558	-0.684305	0.201153
SPBC106.14c	sda1	chromosome_2	SDA1 family protein (predicted)	-0.334372	0.707635	-0.318871	0.72057	0.224639	0.800913
SPBC56F2.08c	puf1	chromosome_2	pumilio family RNA-binding protein Puf1 (predicted)	-0.438686	0.476052	-0.318358	0.604096	-0.386635	0.529436
SPCC1739.06c	met1	chromosome_3	uroporphyrin methyltransferase Met1	1.49414	0.246933	-0.315658	0.804131	0.197923	0.876376
SPBC3B9.14c	mrpl3	chromosome_2	mitochondrial ribosomal protein subunit L3 (predicted)	-0.177794	0.865383	-0.314887	0.764142	-1.33694	0.209944
SPCPB16A4.04c	trm8	chromosome_3	tRNA (guanine-N7-)-methyltransferase catalytic subunit Trm8 (predicted)	-0.2933	0.631001	-0.31414	0.60707	0.4377	0.474833
SPAC23D3.12		chromosome_1	plasma membrane inorganic phosphate transmembrane transporter (predicted)	-1.71649	0.0322147	-0.308788	0.685969	1.47774	0.0619831
SPBP8B7.03c	rpl402	chromosome_2	60S ribosomal protein L4 (predicted)	0.46264	0.229862	-0.304675	0.425072	-1.05501	0.00975573
SPBC6B1.10	prp17	chromosome_2	Prp19 complex WD repeat protein Prp17	-0.50157	0.394744	-0.302241	0.606295	-0.255372	0.662978
SPAP8A3.06	uaf2	chromosome_1	U2AF small subunit, U2AF-23	-0.939879	0.376446	-0.301794	0.774764	0.99701	0.348628
SPCC24B10.04		chromosome_3	Schizosaccharomyces specific protein	-1.59661	0.0448772	-0.298401	0.695791	-1.10011	0.157631
SPBC725.02	mpr1	chromosome_2	histidine-containing response regulator phosphotransferase Mpr1	-0.419127	0.688093	-0.297416	0.775558	-1.31611	0.214262
SPAC959.03c	utp7	chromosome_1	U3 snoRNP-associated protein Utp7 (predicted)	-0.534924	0.579229	-0.295238	0.759033	1.47221	0.135013
SPBC23E6.04c	utp10	chromosome_2	U3 snoRNP-associated protein Utp10 (predicted)	-1.84858	0.0028463	-0.294779	0.600608	1.50544	0.0122984
SPBC13E7.03c	vts1	chromosome_2	Smaug family RNA-binding protein Vts1 (predicted)	-0.345567	0.432619	-0.290253	0.509007	-0.247985	0.572123
SPCC1235.01		chromosome_3	Schizosaccharomyces specific protein	-0.254757	0.701038	-0.286567	0.665976	0.337616	0.611325
SPBC2F12.14c	gua1	chromosome_2	IMP dehydrogenase Gua1	0.0439839	0.941039	-0.285026	0.632536	-0.158361	0.790149
SPCC1259.01c	rps1802	chromosome_3	40S ribosomal protein S18 (predicted)	0.128318	0.821964	-0.285003	0.617978	-0.129455	0.820416
SPAC26H5.10c	tif51	chromosome_1	translation elongation and termination factor eIF5A (predicted)	-1.62699	0.00291469	-0.283791	0.56823	-0.369826	0.458167
SPBP35G2.07	ilv1	chromosome_2	acetolactate synthase catalytic subunit	-0.205698	0.555234	-0.283718	0.417373	0.0278461	0.936114
SPAC1783.08c	rpl1502	chromosome_1	60S ribosomal protein L15b (predicted)	0.0731179	0.94881	-0.27362	0.810242	0.179891	0.874522
SPAC2G11.11c	prh1	chromosome_1	ATP-dependent RNA helicase Prh1 (predicted)	-0.2933	0.626195	-0.271666	0.651757	0.714714	0.241011
SPBC1703.13c		chromosome_2	mitochondrial carrier, inorganic phosphate (predicted)	-0.0848354	0.900051	-0.269838	0.689985	-0.572935	0.399833
SPBC19G7.03c	rps3002	chromosome_2	40S ribosomal protein S30 (predicted)	-0.287401	0.611316	-0.269199	0.633952	-0.695344	0.224927
SPBC582.10c		chromosome_2	ATP-dependent DNA helicase Rhp16b (predicted)	-0.130566	0.879796	-0.268188	0.756268	-0.139683	0.871477
SPAC806.03c	rps2601	chromosome_1	40S ribosomal protein S26 (predicted)	-0.659047	0.239031	-0.267583	0.628368	-0.0269553	0.961015
SPBC651.06	mug166	chromosome_2	Schizosaccharomyces specific protein Mug166	-0.58219	0.431394	-0.267511	0.716284	0.0589697	0.936061
SPAC1F12.02c	tma19	chromosome_1	translationally controlled tumor protein homolog Tma19/Tpt1	0.854585	0.438003	-0.266309	0.807928	-0.296932	0.786382
SPBC14F5.05c	sam1	chromosome_2	S-adenosylmethionine synthetase	-0.783803	0.0954278	-0.263918	0.56424	-1.28518	0.00895167
SPBC651.09c	prf1	chromosome_2	RNA polymerase II associated Paf1 complex (predicted)	-0.477442	0.649471	-0.26352	0.801627	1.2904	0.2256
SPBC354.12	gpd3	chromosome_2	glyceraldehyde 3-phosphate dehydrogenase Gpd3	-2.08076	0.000955084	-0.263312	0.637681	0.209699	0.707376
SPBC336.06c	rnh1	chromosome_2	ribonuclease H Rnh1 (predicted)	-0.243421	0.698457	-0.262347	0.676374	-0.846248	0.185602
SPBC1734.11	mas5	chromosome_2	DNAJ domain protein Mas5 (predicted)	-0.947817	0.134298	-0.261862	0.672275	-0.0550885	0.928957
SPBC13G1.14c	rns1	chromosome_2	exon junction complex subunit, RNA-binding protein Rns1	-0.199637	0.754413	-0.257426	0.686875	-0.542726	0.39821
SPAC15A10.08	ain1	chromosome_1	alpha-actinin	-0.139946	0.793565	-0.257165	0.631202	-0.833902	0.128045
SPBC646.04	pla1	chromosome_2	poly(A) polymerase Pla1	0.697666	0.390748	-0.251238	0.755645	0.506162	0.531972
SPBP8B7.20c	nop2	chromosome_2	rRNA (cytosine-C5-)-methyltransferase activity Nop2 (predicted)	0.337492	0.70472	-0.243202	0.784635	0.540915	0.54457
SPAC644.09		chromosome_1	pyridoxal phosphate homeostasis protein (predicted)	-1.29576	0.0912992	-0.242625	0.744628	-0.539368	0.470969
SPBC713.04c	pwp2	chromosome_2	U3 snoRNP-associated protein Utp1 (predicted)	-3.75489	0.000114021	-0.240146	0.770533	1.66799	0.0516564
SPAC1B3.03c	wis2	chromosome_1	cyclophilin family peptidyl-prolyl cis-trans isomerase Wis2	-1.16996	0.0084487	-0.240015	0.561269	-0.473312	0.256799
SPAC4F10.20	grx1	chromosome_1	glutaredoxin Grx1	-1.56405	0.0168284	-0.237907	0.699162	-0.164745	0.788829
SPBC1215.02c	naa25	chromosome_2	NatB N-acetyltransferase complex regulatory subunit Naa25	-0.894473	0.0943752	-0.23686	0.6487	-1.1029	0.0420986
SPAC343.10	met11	chromosome_1	methylenetetrahydrofolate reductase Met11	-0.400126	0.6926	-0.236606	0.814966	0.0160305	0.987342
SPCC132.01c	mtr1	chromosome_3	microtubule regulator Mtr1	-0.859454	0.454782	-0.236018	0.836473	-1.12585	0.32955
SPBC530.10c	anc1	chromosome_2	mitochondrial carrier, ATP:ADP antiporter Anc1	-0.444347	0.66944	-0.230522	0.824473	-0.556227	0.593467
SPAC24B11.11c	sid2	chromosome_1	NDR kinase Sid2	0.610219	0.368446	-0.224766	0.738551	-0.242711	0.718585
SPCC285.03	dbp6	chromosome_3	ATP-dependent RNA helicase Dbp6 (predicted)	-0.2933	0.594422	-0.224352	0.68343	0.785851	0.161238
SPAC25H1.08c	sqt1	chromosome_1	ribosome assembly protein Sqt1 (predicted)	-0.882069	0.0796664	-0.221757	0.649445	0.380379	0.437546
SPAC664.04c	rps1602	chromosome_1	40S ribosomal protein S16 (predicted)	0.570867	0.159222	-0.218428	0.58335	-0.688994	0.0923233
SPBP8B7.23	rnf10	chromosome_2	ubiquitin-protein ligase E3 (predicted)	0.796146	0.515062	-0.217283	0.858399	1.43118	0.246591
SPAC24C9.12c	shm1	chromosome_1	serine hydroxymethyltransferase Shm1 (predicted)	0.191065	0.720822	-0.20762	0.697847	-0.622687	0.250247
SPBC3B9.19	mge1	chromosome_2	mitochondrial [2Fe-2S] cluster assembly and protein import chaperone Mge1 (predicted)	-0.420351	0.356728	-0.207466	0.646944	0.429927	0.346079
SPCC830.08c	yop1	chromosome_3	ER membrane protein DP1/Yop1	-2.1466	0.00186924	-0.206091	0.739859	-0.685424	0.275044
SPCC191.02c	acs1	chromosome_3	acetyl-CoA ligase (predicted)	0.0553965	0.933592	-0.203084	0.760218	-0.261484	0.694541
SPAC22E12.02		chromosome_1	splicing factor, WW domain -binding Rbm42 (predicted)	2.02523	0.0547488	-0.202062	0.841946	0.235351	0.816366
SPAC1006.07	tif1	chromosome_1	translation initiation factor eIF4A tif1	0.129202	0.748994	-0.201214	0.618816	-0.448957	0.271908
SPAC683.02c		chromosome_1	zf-CCHC type zinc finger protein, human ZCCHC9 ortholog, implicated in mRNA splicing (predicted)	-3.76968	7.41864e-07	-0.201051	0.725813	0.218756	0.702839
SPBC215.05	gpd1	chromosome_2	glycerol-3-phosphate dehydrogenase Gpd1	-0.311763	0.492315	-0.199497	0.65944	-0.152707	0.735651
SPBC30D10.07c	bpl1	chromosome_2	biotin-protein ligase Bpl1 (predicted)	1.63651	0.00694329	-0.198605	0.722975	0.209631	0.708323
SPAC19A8.05c	sst4	chromosome_1	sorting receptor for ubiquitinated membrane proteins, ESCRT 0 complex subunit Sst4	-1.59216	0.0211174	-0.195444	0.764405	-1.22454	0.0697298
SPCC737.06c	gcs2	chromosome_3	glutamate-cysteine ligase regulatory subunit Gcs2 (predicted)	0.255935	0.461633	-0.190916	0.58194	0.562033	0.11352
SPAC6B12.19	rsa3	chromosome_1	ribosome assembly protein Rsa3 (predicted)	-0.2933	0.805055	-0.190739	0.872435	0.848928	0.477107
SPAC1002.19	urg1	chromosome_1	GTP cyclohydrolase II Urg1 (predicted)	0.860831	0.0816783	-0.190552	0.69093	-1.03868	0.0382854
SPBC4B4.08	ght2	chromosome_2	plasma membrane glucose/fructose:proton symporter Ght2	-1.23029	0.19249	-0.189661	0.837937	2.78986	0.00566473
SPBC11B10.09	cdc2	chromosome_2	cyclin-dependent protein kinase Cdk1/Cdc2	0.133494	0.834371	-0.189431	0.766791	-0.565606	0.379391
SPAC4D7.09	tif223	chromosome_1	translation initiation factor eIF2B gamma subunit	0.735524	0.121804	-0.189201	0.683483	0.138536	0.765105
SPAC139.01c	ath2	chromosome_1	Ath1 complex protein Ath2 nuclease, XP-G family	0.157826	0.890295	-0.184276	0.872066	0.970231	0.399977
SPBC1703.10	ypt1	chromosome_2	GTPase Ypt1	-1.02207	0.306042	-0.184032	0.852192	-0.387832	0.694942
SPAC144.11	rps1102	chromosome_1	40S ribosomal protein S11 (predicted)	0.516236	0.239298	-0.183684	0.671436	-0.548268	0.212237
SPBC29A10.12	oxs1	chromosome_2	oxidative stress transcription coactivator Oxs1	0.368445	0.461366	-0.180746	0.716643	-0.322387	0.518672
SPCP31B10.08c	rpl35a	chromosome_3	60S ribosomal protein L35a	-0.320519	0.667257	-0.178036	0.811005	-1.09332	0.150726
SPBC21D10.11c	nfs1	chromosome_2	mitochondrial [2Fe-2S] cluster asssembly and tRNA modification cysteine desulfurase Nfs1	2.60092	0.0061584	-0.176467	0.840097	0.155781	0.858617
SPBC646.13	sds23	chromosome_2	PP2A-type phosphatase inhibitor Sds23/Moc1	0.91047	0.142325	-0.174146	0.774127	-0.299968	0.621677
SPCC24B10.07	gad8	chromosome_3	AGC family protein kinase Gad8	-0.2933	0.658398	-0.170526	0.796862	-0.538195	0.419487
SPBC19G7.10c	pdc2	chromosome_2	topoisomerase II-associated deadenylation-dependent mRNA-decapping factor Pdc2 (predicted)	0.607542	0.458283	-0.168133	0.836497	-0.312005	0.702056
SPAC30C2.08		chromosome_1	UPF0662 family conserved fungal protein	-0.254437	0.517115	-0.166395	0.671031	-0.0282889	0.942327
SPBC3B9.01	fes1	chromosome_2	Hsp70 nucleotide exchange factor Fes1 (predicted)	-0.0886108	0.800075	-0.161533	0.644849	-0.0942442	0.787678
SPBC12C2.04		chromosome_2	NAD binding dehydrogenase family protein	0.401293	0.34905	-0.15176	0.721086	0.237424	0.577235
SPBC16H5.08c		chromosome_2	ribosome biogenesis ATPase, Arb family ABCF2-like (predicted)	0.105537	0.860774	-0.149469	0.803891	-0.602455	0.321686
SPCC830.07c	psi1	chromosome_3	DNAJ domain protein Psi1	0.188962	0.785933	-0.146405	0.833282	-0.58288	0.405288
SPAPB17E12.02	yip12	chromosome_1	SMN family protein Yip12	0.922844	0.0149557	-0.146326	0.681108	0.269121	0.451693
SPAC4F8.12c	spp42	chromosome_1	U5 snRNP complex subunit Spp42	-1.60007	0.00103962	-0.144087	0.739512	0.640028	0.148268
SPCC613.06	rpl902	chromosome_3	60S ribosomal protein L9	4.80811	1.25011e-07	-0.143599	0.826478	0.328896	0.616367
SPAC17D4.04	trm401	chromosome_1	tRNA (cytosine-5-)-methyltransferase (predicted)	-0.161059	0.903246	-0.137497	0.917342	0.942433	0.479186
SPBP19A11.01	gcv3	chromosome_2	glycine decarboxylase complex subunit H (predicted)	-4.2309	0.000899798	-0.13631	0.903748	-0.0458231	0.967569
SPCP1E11.08	nsa2	chromosome_3	ribosome biogenesis protein Nsa2 (predicted)	-0.59418	0.409169	-0.134283	0.851012	0.309566	0.665523
SPAC17G6.10	ssr1	chromosome_1	SWI/SNF and RSC complex subunit Ssr1	-2.02255	0.00170036	-0.133039	0.817992	-0.0259658	0.964155
SPBC1711.06	rpl401	chromosome_2	60S ribosomal protein L4 (predicted)	0.691737	0.251424	-0.132922	0.823216	-1.17163	0.0581028
SPAC27E2.03c		chromosome_1	Obg-like ATPase, human OLA1 ortholog (predicted)	-0.238871	0.650941	-0.132241	0.801919	-0.697547	0.193524
SPAC57A7.04c	pabp	chromosome_1	mRNA export shuttling protein	-0.452008	0.247732	-0.130255	0.735736	-0.12427	0.747427
SPAC821.04c	cid13	chromosome_1	poly(A) polymerase Cid13	-0.2933	0.621775	-0.129521	0.827183	0.46065	0.44018
SPBC3F6.01c		chromosome_2	TPR repeat serine/threonine protein phosphatase (predicted)	0.641125	0.261148	-0.128214	0.819903	-0.665217	0.244132
SPAC222.18		chromosome_1	Srp1 family splicing factor (predicted)	1.8584	0.0489727	-0.122061	0.892727	0.899234	0.325416
SPBP8B7.16c	dbp2	chromosome_2	ATP-dependent RNA helicase Dbp2	0.344173	0.530689	-0.121269	0.824528	0.493471	0.370799
SPAC9.13c	cwf16	chromosome_1	splicing factor Cwf16	0.667629	0.380414	-0.114848	0.879105	0.500668	0.509159
SPBC16C6.11	rpl3201	chromosome_2	60S ribosomal protein L32	0.934309	0.209182	-0.114252	0.875906	-0.685092	0.353406
SPBC32F12.11	tdh1	chromosome_2	glyceraldehyde-3-phosphate dehydrogenase Tdh1	-0.632259	0.247758	-0.110316	0.837964	0.410505	0.449263
SPBC365.05c	slu7	chromosome_2	splicing factor Slu7	-1.12274	0.0630799	-0.105965	0.855536	-0.195004	0.737811
SPAC328.10c	rps502	chromosome_1	40S ribosomal protein S5 (predicted)	0.043666	0.901564	-0.10306	0.770513	-0.684003	0.0620554
SPBC28F2.02	mep33	chromosome_2	translation machinery associated protein Mep33	0.131916	0.843533	-0.101267	0.879547	-0.784836	0.246894
SPBC646.16	scl1	chromosome_2	20S proteasome complex subunit alpha 1	1.01363	0.0471562	-0.10031	0.837623	0.174398	0.721859
SPAC1486.04c	alm1	chromosome_1	nucleoporin Alm1	-1.20629	0.228826	-0.100163	0.919167	0.189613	0.847697
SPBC16D10.08c	hsp104	chromosome_2	heat shock protein Hsp104	-1.8978	0.00986764	-0.097885	0.886166	-1.17807	0.0945437
SPAC17C9.06	sam50	chromosome_1	mitochondrial sorting and assembly machinery complex subunit Sam50 (predicted)	0.146898	0.828186	-0.0945559	0.888866	-0.698186	0.307482
SPBC17D11.05	tif32	chromosome_2	translation initiation factor eIF3a	1.1592	0.174957	-0.0928561	0.911758	0.395583	0.6376
SPCC550.14	vgl1	chromosome_3	KH domain RNA binding protein, vigilin (predicted)	1.16698	0.0108194	-0.0907294	0.831585	-0.0707893	0.868187
SPAC959.07	rps403	chromosome_1	40S ribosomal protein S4 (predicted)	0.88792	0.369231	-0.0902943	0.92662	0.223985	0.819373
SPAC9E9.11	plr1	chromosome_1	pyridoxal reductase Plr1	0.986653	0.120957	-0.0901907	0.884347	-0.557621	0.37246
SPBC17G9.07	rps2402	chromosome_2	40S ribosomal protein S24 (predicted)	-0.515368	0.220517	-0.0889479	0.829927	-0.858262	0.0469805
SPBC36.09	sap61	chromosome_2	U2 snRNP-associated protein sap61	2.27447	0.0808492	-0.0850951	0.946179	-1.01744	0.422774
SPAC328.03	tps1	chromosome_1	alpha,alpha-trehalose-phosphate synthase [UDP-forming]	-0.522573	0.570896	-0.0849159	0.926379	-0.918869	0.32243
SPAC10F6.02c	prp22	chromosome_1	ATP-dependent RNA helicase Prp22	-0.61765	0.111488	-0.0815501	0.82909	0.55036	0.153898
SPAC19D5.03	cid1	chromosome_1	terminal uridylyltransferase Cid1	0.289871	0.522946	-0.0797177	0.859985	-0.055866	0.901603
SPAC16E8.06c	nop12	chromosome_1	RNA-binding protein Nop12 (predicted)	2.01779	0.0175262	-0.0751172	0.925065	0.745414	0.355026
SPBC21C3.12c		chromosome_2	thioredoxin family protein, peroxidase	0.45435	0.361441	-0.0751054	0.879046	-0.0401856	0.935093
SPAC1783.05	hrp1	chromosome_1	ATP-dependent DNA helicase Hrp1	-0.2933	0.761828	-0.0732292	0.939625	2.39088	0.0197809
SPBC776.11	rpl2801	chromosome_2	60S ribosomal protein L27/L28	1.47031	0.0225584	-0.0729723	0.904642	0.0149227	0.980452
SPAC19A8.08	upf2	chromosome_1	nonsense-mediated decay protein Upf2	-0.274715	0.638154	-0.069634	0.904902	-0.293454	0.615531
SPBC3F6.04c	nop14	chromosome_2	U3 snoRNP protein Nop14 (predicted)	-0.2933	0.662574	-0.0692139	0.917826	1.0463	0.12819
SPBP22H7.08	rps1002	chromosome_2	40S ribosomal protein S10 (predicted)	0.844774	0.0962647	-0.0691056	0.888527	-0.574812	0.250286
SPAC9E9.09c	atd1	chromosome_1	aldehyde dehydrogenase (predicted)	0.701279	0.107247	-0.0664181	0.875361	-0.0480618	0.909621
SPBC428.11	met17	chromosome_2	homocysteine synthase Met17	-2.34708	0.00280104	-0.0662153	0.925849	-2.02095	0.00847571
SPAC4G9.11c	cmb1	chromosome_1	cytosine-mismatch binding protein 1	2.42728	0.000187671	-0.0648502	0.90707	-0.486153	0.3853
SPAC17A5.13	fol2	chromosome_1	GTP cyclohydrolase Fol2 (predicted)	5.98729	0.00997698	-0.0620412	0.97709	0.333022	0.877521
SPCC13B11.01	adh1	chromosome_3	alcohol dehydrogenase Adh1	-0.261075	0.50333	-0.0596416	0.877934	-0.209394	0.590789
SPAC17A5.15c	gus1	chromosome_1	cytoplasmic glutamate-tRNA ligase Gus1 (predicted)	-0.538277	0.38967	-0.0592299	0.923996	-0.508319	0.4162
SPAC11H11.06	arp2	chromosome_1	ARP2/3 actin-organizing complex subunit Arp2	-0.973003	0.472041	-0.0578563	0.965702	0.16667	0.90143
SPAC1834.01	erf1	chromosome_1	cytoplasmic translation release factor class I eRF1	-0.0334312	0.942072	-0.0571441	0.901161	-0.689084	0.143306
SPBC428.19c	utp15	chromosome_2	U3 snoRNP-associated WD repeat protein Utp15 (predicted)	-2.11318	0.0060863	-0.0539525	0.939355	0.141191	0.842243
SPBC1105.02c	lys4	chromosome_2	homocitrate synthase	-0.776217	0.0457921	-0.0473955	0.89867	-0.741872	0.0554082
SPBC21B10.03c	ath1	chromosome_2	ataxin-2 homolog	1.24134	0.156523	-0.0437317	0.959319	0.134127	0.875712
SPBC1289.11	spf38	chromosome_2	U5 snRNP complex subunit Spf38	1.70305	0.0354428	-0.0406829	0.957953	0.595325	0.443281
SPAC17C9.03	tif471	chromosome_1	translation initiation factor eIF4G	1.05291	0.0135814	-0.0404813	0.919207	0.136869	0.731935
SPAC1687.09	irs4	chromosome_1	autophagy/CVT pathway ENTH/VHS domain protein Irs4 (predicted)	0.597458	0.308303	-0.0356146	0.951032	0.0647622	0.911094
SPBC31E1.06	bms1	chromosome_2	GTP binding protein Bms1 (predicted)	-1.86256	0.0129463	-0.0356146	0.959446	0.0647622	0.926335
SPAC2F7.03c	pom1	chromosome_1	DYRK family cell polarity protein kinase Pom1	-0.418747	0.316352	-0.0356146	0.931357	0.0647622	0.875555
SPAC29A4.06c		chromosome_1	splicing protein, human NSRP1 ortholog	0.00427713	0.9922	-0.0356146	0.93513	0.0647622	0.882358
SPCC188.11	prp45	chromosome_3	Prp19 complex subunit Prp45	-1.96483	0.011825	-0.0356146	0.96099	0.0647622	0.929132
SPAC11E3.05	sea3	chromosome_1	SEA complex ubiquitin-protein ligase E3 subunit Sea3 (predicted)	-1.13382	0.00929717	-0.0356146	0.929883	0.0647622	0.8729
SPAC24C9.11	sgd1	chromosome_1	ribosome small subunit biogenesis protein Sgd1 (predicted)	-0.811998	0.199816	-0.0356146	0.954357	0.0647622	0.917113
SPAC637.03		chromosome_1	DUF1774 family multi-spanning conserved fungal membrane protein	1.08327	0.0491309	-0.0356146	0.946214	0.0647622	0.902377
SPAC6G10.12c	ace2	chromosome_1	transcription factor Ace2	3.79569	3.3275e-10	-0.0356146	0.924057	0.0647622	0.862414
SPAC18G6.09c	edc1	chromosome_1	Dcp2-Dcp1 mRNA-decapping complex subunit Edc1	-1.48956	0.00120099	-0.0356146	0.930664	0.0647622	0.874307
SPAC13G7.03	upf3	chromosome_1	up-frameshift suppressor 3 family protein (predicted)	-1.02683	0.0376394	-0.0356146	0.939762	0.0647622	0.890717
SPAC1093.06c	dhc1	chromosome_1	minus-end directed microtubule motor, dynein heavy chain Dhc1	-0.600198	0.206081	-0.0356146	0.939158	0.0647622	0.889626
SPBC15D4.02	gsf1	chromosome_2	transcription factor, zf-fungal binuclear cluster type Gsf1	-0.339168	0.3648	-0.0356146	0.923523	0.0647622	0.861454
SPBC887.05c	cwf29	chromosome_2	RNA-binding protein Cwf29	0.429615	0.266616	-0.0356146	0.925653	0.0647622	0.865286
SPBC2A9.10		chromosome_2	Bin3 family, 7SK RNA methyltransferase (predicted)	1.9318	0.000735817	-0.0356146	0.943659	0.0647622	0.897757
SPAC3H1.11	hsr1	chromosome_1	transcription factor Hsr1	-2.49809	0.00328097	-0.0356146	0.963216	0.0647622	0.93317
SPAC6C3.05	meu43	chromosome_1	Schizosaccharomyces specific protein Meu43	-1.69301	0.0257886	-0.0356146	0.960512	0.0647622	0.928266
SPAC17H9.01	cid16	chromosome_1	poly(A/U) polymerase Cid16 (predicted)	-1.26703	0.0259684	-0.0356146	0.947325	0.0647622	0.904385
SPCC1183.09c	pmp31	chromosome_3	plasma membrane proteolipid Pmp31	-1.09273	0.14907	-0.0356146	0.961642	0.0647622	0.930314
SPBC146.08c	tif1102	chromosome_2	translation initiation factor eIF1A-like (predicted)	-0.945467	0.0731507	-0.0356146	0.944283	0.0647622	0.898886
SPBC25B2.07c	mmb1	chromosome_2	mitochondrial microtubule binder Mmb1	0.201341	0.801761	-0.0356146	0.964554	0.0647622	0.935596
SPBC1718.03	ker1	chromosome_2	DNA-directed RNA polymerase I complex subunit Ker1	0.847248	0.364749	-0.0356146	0.969339	0.0647622	0.94428
SPBC19G7.05c	bgs1	chromosome_2	primary septum and spore wall linear 1,3-beta-glucan synthase catalytic subunit Bgs1	-1.94038	0.0182658	-0.0356146	0.963278	0.0647622	0.933282
SPCC1620.14c	snf22	chromosome_3	ATP-dependent DNA helicase Snf22	-1.78606	0.0158561	-0.0356146	0.959116	0.0647622	0.925737
SPAC12G12.09	eti1	chromosome_1	WD repeat protein associated with stress granule	-0.309616	0.493874	-0.0356146	0.936962	0.0647622	0.885662
SPCC777.15	dus4	chromosome_3	tRNA dihydrouridine synthase Dus4 (predicted)	-0.282423	0.413111	-0.0356146	0.917216	0.0647622	0.850126
SPAC6B12.07c		chromosome_1	ubiquitin-protein ligase E3 with SPX domain, human LORNRF1 ortholog (predicted)	1.6211	0.000226703	-0.0356146	0.924814	0.0647622	0.863777
SPCC737.08	mdn1	chromosome_3	midasin, Mdn1	1.90956	0.160008	-0.0356146	0.978644	0.0647622	0.961176
SPAC29A4.03c	mrps9	chromosome_1	mitochondrial ribosomal protein subunit Mrps9 (predicted)	1.90981	0.000497985	-0.0356146	0.940728	0.0647622	0.892463
SPCP1E11.05c	are2	chromosome_3	acyl-coA-sterol acyltransferase Are2 (predicted)	-4.46202	5.07067e-09	-0.0356146	0.943981	0.0647622	0.89834
SPBC3H7.05c		chromosome_2	mitochondrial Membrane Bound O-Acyl Transferase (MBOAT) family	-2.53991	0.000740927	-0.0356146	0.957162	0.0647622	0.922195
SPAC17C9.07	alg8	chromosome_1	dolichyl pyrophosphate Glc1Man9GlcNAc2 alpha-1,3-glucosyltransferase Alg8 (predicted)	-2.44564	0.000367165	-0.0356146	0.952309	0.0647622	0.913404
SPAC3F10.11c	abc2	chromosome_1	vacuolar phytochelatin and glutathione S-conjugate ABC family transmembrane transporter Abc2	-1.99154	0.00283072	-0.0356146	0.953015	0.0647622	0.914682
SPAC19B12.03	bgs3	chromosome_1	1,3-beta-glucan synthase subunit Bgs3	-1.87268	0.00489103	-0.0356146	0.95343	0.0647622	0.915434
SPCPB1C11.03		chromosome_3	cysteine transmembrane transporter (predicted)	-1.81321	4.62051e-05	-0.0356146	0.923043	0.0647622	0.860592
SPAC19B12.07c		chromosome_1	zinc finger C2H2-type, human ZNF277 ortholog, implicated in transcriptional regulation	-1.46053	0.00616462	-0.0356146	0.942177	0.0647622	0.89508
SPBP8B7.01c	pop7	chromosome_2	RNAseP RNAse MRP subunit Pop7	-0.65242	0.0604994	-0.0356146	0.915222	0.0647622	0.846548
SPBC16C6.03c	rsa1	chromosome_2	ribosome assembly protein Rsa1 (predicted)	-0.247187	0.676096	-0.0356146	0.951912	0.0647622	0.912685
SPBC2G2.02	syj1	chromosome_2	inositol-polyphosphate 5-phosphatase, synaptojanin homolog 1	-0.161418	0.73063	-0.0356146	0.939376	0.0647622	0.89002
SPAC2F3.14c	saf2	chromosome_1	splicing associated factor Saf2	0.0692303	0.841467	-0.0356146	0.91802	0.0647622	0.851568
SPBC3H7.08c		chromosome_2	mitochondrial conserved fungal membrane protein	0.106592	0.93025	-0.0356146	0.976667	0.0647622	0.957586
SPAC2C4.12c	tpt1	chromosome_1	tRNA 2'-phosphotransferase Tpt1/ CIA machinery involved in ribosome biogenesis protein Yae1 fusion protein (predicted)	0.817359	0.246791	-0.0356146	0.959167	0.0647622	0.925829
SPAC23G3.02c	sib1	chromosome_1	ferrichrome synthetase Sib1	1.68296	0.00360516	-0.0356146	0.946073	0.0647622	0.902122
SPBC28F2.05c		chromosome_2	xylose and arabinose reductase (predicted)	-2.30141	0.0716758	-0.0356146	0.976967	0.0647622	0.958131
SPAC20G4.07c	erg4	chromosome_1	C-24(28) sterol reductase Erg4	-1.57931	0.0108288	-0.0356146	0.950798	0.0647622	0.91067
Pombase:NA	atf1_isp4_weird	not_annotated	NA	-1.2253	0.0223195	-0.0356146	0.943949	0.0647622	0.898282
SPAC23C11.04c	pnk1	chromosome_1	DNA kinase/phosphatase Pnk1	-0.684517	0.0650361	-0.0356146	0.920664	0.0647622	0.856317
SPAC13G7.09c		chromosome_1	conserved fungal protein	0.0173747	0.973094	-0.0356146	0.944884	0.0647622	0.899971
SPBC31F10.04c	srb4	chromosome_2	mediator complex subunit Med17	0.397602	0.371936	-0.0356146	0.935713	0.0647622	0.883409
SPCC70.09c	mug9	chromosome_3	DUF2406 family conserved fungal protein	0.516069	0.184484	-0.0356146	0.92564	0.0647622	0.865262
SPBC9B6.06	mrpl10	chromosome_2	mitochondrial ribosomal protein subunit L15 (predicted)	0.64564	0.121081	-0.0356146	0.930068	0.0647622	0.873233
SPAC607.02c		chromosome_1	conserved fungal protein	0.759046	0.103131	-0.0356146	0.937271	0.0647622	0.886222
SPBC839.02	aly1	chromosome_2	arrestin Aly1 related Aly1	1.08079	0.0064281	-0.0356146	0.922379	0.0647622	0.859398
SPBC18H10.09		chromosome_2	zf-CHY type zinc finger protein	1.75537	7.64698e-05	-0.0356146	0.923698	0.0647622	0.861769
SPBC31F10.10c		chromosome_2	Armadillo-type fold protein, zf-MYND type zinc finger protein	2.5968	5.41158e-08	-0.0356146	0.915766	0.0647622	0.847525
SPAC56F8.16	esc1	chromosome_1	transcription factor Esc1 (predicted)	3.31481	1.4852e-08	-0.0356146	0.928953	0.0647622	0.871225
SPCC965.05c	thp1	chromosome_3	uracil DNA N-glycosylase Thp1	-0.2933	0.539756	-0.0356146	0.940411	1.12506	0.0253423
SPCC16C4.12	naa20	chromosome_3	NatB N-acetyltransferase complex catalytic subunit Naa20 (predicted)	-0.337879	0.526919	-0.0356146	0.9466	0.0647622	0.903075
SPBC1921.01c	rpl35b	chromosome_2	60S ribosomal protein L35a (predicted)	0.605306	0.529465	-0.0286204	0.97618	-0.438396	0.648141
SPCC1906.02c	cue3	chromosome_3	CUE domain protein Cue3, human ASCC2 ortholog, activating signal cointegrator 1 complex (predicted)	-0.0463174	0.930954	-0.0271223	0.959533	-1.44075	0.0119099
SPAPJ698.03c	prp12	chromosome_1	U2 snRNP-associated protein Sap130	-0.0902259	0.942119	-0.0265874	0.982929	0.389686	0.754072
SPBC1815.01	eno101	chromosome_2	enolase (predicted)	-0.0722533	0.845535	-0.0250516	0.946127	-0.515676	0.17277
SPAC8C9.07	fyv7	chromosome_1	rRNA processing protein Fyv7 (predicted)	-0.2933	0.693313	-0.0211682	0.977256	-1.31347	0.0866035
SPBC19F8.08	rps401	chromosome_2	40S ribosomal protein S4 (predicted)	0.435031	0.28128	-0.0211582	0.957684	-0.555065	0.172462
SPBC1711.17	prp16	chromosome_2	ATP-dependent RNA helicase Prp16	-2.36351	0.0227175	-0.0189486	0.984578	-0.532653	0.588056
SPCC24B10.09	rps1702	chromosome_3	40S ribosomal protein S17 (predicted)	0.967197	0.0492114	-0.0158646	0.97316	-1.26586	0.0122101
SPBC685.06	rps001	chromosome_2	40S ribosomal protein S0A (p40)	0.485663	0.275744	-0.0156879	0.971554	-1.25806	0.00810544
SPAC9.09	met26	chromosome_1	homocysteine methyltransferase Met26	-0.440251	0.120684	-0.0155415	0.955159	-0.453533	0.110424
SPCC16C4.15	rml2	chromosome_3	mitochondrial ribosomal protein subunit L2 (predicted)	0.456686	0.501958	-0.0117113	0.986196	0.418802	0.537771
SPAC13G7.13c	msa1	chromosome_1	RNA-binding protein Msa1	-1.6986	0.328521	-0.00906346	0.995797	0.489951	0.776026
SPAC3C7.08c	elf1	chromosome_1	AAA family ATPase Elf1	-0.0371369	0.939675	-0.00830585	0.986495	-0.057031	0.907486
SPCC338.05c	mms2	chromosome_3	ubiquitin conjugating enzyme Mms2	0.00573746	0.990872	-0.0068936	0.989033	1.08518	0.0388707
SPAC6G10.08	idp1	chromosome_1	isocitrate dehydrogenase Idp1 (predicted)	-0.709253	0.485222	-0.00591314	0.995333	0.889898	0.38261
SPAC13C5.01c	pre9	chromosome_1	20S proteasome complex subunit alpha 3 Pre9	1.51032	0.0128556	-0.00533845	0.992492	-0.288737	0.611752
SPAC630.03	arp3	chromosome_1	Arp2/3 protein complex, actin-like protein subunit Arp3	-0.682383	0.415219	-0.0045845	0.995601	-1.22878	0.148546
SPAC24B11.12c		chromosome_1	plasma membrane phospholipid-translocating ATPase complex, ATPase subunit (predicted)	0.566767	0.266856	-0.00025196	0.999601	-0.451498	0.374135
SPAC1952.03	otu2	chromosome_1	ubiquitin specific cysteine protease, OTU family, Otu2	-0.277384	0.832311	0.00319683	0.998052	-0.912596	0.48808
SPBP22H7.07	prp5	chromosome_2	Prp19 complex WD repeat protein Prp5	-1.82817	0.075554	0.00681637	0.994529	1.20805	0.23146
SPAC328.06	ubp2	chromosome_1	ubiquitin C-terminal hydrolase Ubp2	-1.24136	0.0671801	0.00723042	0.991178	-0.792971	0.232439
SPAC3C7.14c	obr1	chromosome_1	NAD(P)H dehydrogenase (quinone) (predicted)	-0.906067	0.269847	0.00875852	0.991377	0.631114	0.439092
SPBC800.08	gcd10	chromosome_2	tRNA (m1A) methyltransferase non-catalytic subunit Gcd10 (predicted)	2.97544	0.0099196	0.00994975	0.992599	0.838779	0.437214
SPBC11C11.02	imp2	chromosome_2	contractile ring protein Imp2	0.82262	0.265414	0.0112921	0.987639	-0.362956	0.619419
SPBC660.07	ntp1	chromosome_2	alpha,alpha-trehalase Ntp1	0.148681	0.898254	0.0128603	0.991174	-0.0709537	0.951336
SPAC22A12.15c	bip1	chromosome_1	ER heat shock protein BiP	-1.08208	0.0158232	0.013082	0.975196	-0.181402	0.666991
SPAC227.07c	pab1	chromosome_1	protein phosphatase PP2A regulatory subunit B-55 Pab1	1.99793	0.000542996	0.0139443	0.977988	-0.018844	0.970256
SPBC17A3.04c	rar1	chromosome_2	cytoplasmic methionine-tRNA ligase Mrs1 (predicted)	0.425165	0.325593	0.0147236	0.97256	0.139094	0.745487
SPBC36B7.04	dus1	chromosome_2	tRNA dihydrouridine synthase Dus1 (predicted)	1.06764	0.014472	0.0159513	0.968885	0.26329	0.521507
SPBC428.05c	arg12	chromosome_2	argininosuccinate synthase Arg12	-0.381677	0.532608	0.0189574	0.97517	0.0702402	0.908203
SPBC31F10.12	tma20	chromosome_2	RNA-binding protein Tma20 (predicted)	1.51261	0.0284045	0.0201037	0.975512	0.0837009	0.898325
SPAC22E12.05c	rer1	chromosome_1	Rer1 family protein (predicted)	-2.96017	0.00592876	0.022709	0.981694	-0.0259713	0.979065
SPCC970.09	sec8	chromosome_3	exocyst complex subunit Sec8	-0.2933	0.816968	0.032631	0.979445	2.79562	0.0354261
SPAC25G10.08		chromosome_1	translation initiation factor eIF3b (p84)	-0.336072	0.38594	0.0349316	0.927619	-0.495106	0.20566
SPAC1420.04c	cox1101	chromosome_1	cytochrome c oxidase assembly protein Cox1101/ mitochondrial ribosomal protein Rsm22 fusion protein	-0.2933	0.686879	0.0349715	0.9616	-0.0124176	0.98636
SPBC19C2.07	fba1	chromosome_2	fructose-bisphosphate aldolase Fba1	-0.0362298	0.938192	0.0355632	0.939327	-0.690574	0.148416
SPCC736.13		chromosome_3	short chain dehydrogenase (predicted)	-4.52556	2.81258e-09	0.0375752	0.939858	-0.954429	0.0647652
SPAC26F1.06	gpm1	chromosome_1	monomeric 2,3-bisphosphoglycerate (BPG)-dependent phosphoglycerate mutase (PGAM), Gpm1	-1.20112	0.0189379	0.0427528	0.929314	-0.244818	0.612423
SPBC2D10.10c	fib1	chromosome_2	fibrillarin, rRNA methyltransferase	0.781009	0.151313	0.0437618	0.934484	0.903032	0.0994979
SPBC3E7.14	smf1	chromosome_2	Sm snRNP core protein Smf1	1.84391	0.0056764	0.0445276	0.942076	0.115709	0.850285
SPBC839.06	cta3	chromosome_2	P-type ATPase, potassium exporting Cta3	-0.0520486	0.95097	0.0455648	0.957071	3.84282	0.000121489
SPAC4A8.09c	cwf21	chromosome_1	complexed with Cdc5 protein Cwf21	-0.246621	0.608908	0.0503618	0.916565	0.585399	0.230475
SPBC1A4.08c	cct3	chromosome_2	chaperonin-containing T-complex gamma subunit Cct3	0.503883	0.386779	0.0508297	0.929873	-0.106972	0.853107
SPAC5D6.13	vps74	chromosome_1	Golgi phosphoprotein 3 family Vps74 (predicted)	-1.3768	0.0101616	0.0520915	0.916734	-0.643867	0.204046
SPAC144.01		chromosome_1	Schizosaccharomyces specific protein	-0.2933	0.460118	0.0539254	0.891364	0.517075	0.198206
SPCC550.03c	ski2	chromosome_3	Ski complex RNA helicase Ski2 (predicted)	0.600389	0.16038	0.060131	0.885826	0.171547	0.682543
SPBC2D10.12	rhp23	chromosome_2	Rad23 homolog Rhp23	-1.24835	0.0074387	0.0607854	0.887885	-0.43575	0.317293
SPBC1703.06	pof10	chromosome_2	F-box/WD repeat protein Pof10	-0.2933	0.712949	0.0668805	0.933051	1.19492	0.142504
SPBP23A10.07	rpa2	chromosome_2	DNA-directed RNA polymerase I complex subunit Rpa2	1.34378	0.0176019	0.0682524	0.897976	0.995125	0.0711015
SPBC1289.06c	ppr8	chromosome_2	mitochondrial PPR repeat protein Ppr8	0.136511	0.897884	0.0688435	0.94839	0.392038	0.712806
SPBC25H2.05	egd2	chromosome_2	nascent polypeptide-associated complex alpha subunit Egd2	-1.12614	0.0115749	0.0711148	0.864275	-0.617483	0.146705
SPAC458.02c		chromosome_1	mRNP complex (predicted)	0.0926396	0.793144	0.0732457	0.835705	-0.216243	0.541786
SPCC1840.11	csl4	chromosome_3	exosome subunit Csl4	-1.76234	0.0876526	0.0749858	0.940215	3.89612	0.000626483
SPBC2F12.04	rpl1701	chromosome_2	60S ribosomal protein L17	0.80618	0.0680783	0.075936	0.858633	-0.161512	0.705142
SPCC1442.09	trp3	chromosome_3	anthranilate synthase component I Trp3	1.20943	0.0845348	0.0789316	0.907454	0.482802	0.479343
SPCC1393.03	rps1501	chromosome_3	40S ribosomal protein S15 (predicted)	2.10831	0.161641	0.0791033	0.957228	-0.993805	0.502486
SPAC24C9.06c	aco1	chromosome_1	aconitate hydratase Aco1 (predicted)	1.73264	0.000253988	0.0808293	0.842847	-0.682736	0.103547
SPBC24C6.02	spb4	chromosome_2	ATP-dependent RNA helicase Spb4 (predicted)	1.14848	0.0490386	0.0839897	0.880688	0.125052	0.823213
SPAC23E2.02	lsd2	chromosome_1	histone demethylase SWIRM2 (predicted)	-1.1552	0.403141	0.0853344	0.950387	0.595414	0.664811
SPAC29A4.02c		chromosome_1	translation elongation factor EF-1 gamma subunit	-0.00700303	0.988079	0.0869591	0.852871	0.0235349	0.959955
SPBC839.15c	tef103	chromosome_2	translation elongation factor EF-1 alpha Ef1a-c	0.282536	0.449401	0.0871752	0.81445	-0.292436	0.433875
SPBC4B4.04	eif21	chromosome_2	translation initiation factor eIF2A (predicted)	0.859941	0.0419394	0.0886313	0.826499	-0.717955	0.0853593
SPAC1071.12c	stp1	chromosome_1	protein tyrosine phosphatase Stp1, unknown biological role	-1.06724	0.288603	0.0894622	0.928261	0.354549	0.721574
SPCC1223.14	aro2	chromosome_3	chorismate synthase Aro2 (predicted)	1.2244	0.118833	0.0899077	0.906413	0.790152	0.306869
SPAC31G5.17c	rps1001	chromosome_1	40S ribosomal protein S10 (predicted)	0.675835	0.148447	0.0903071	0.843503	-1.08804	0.0243619
SPAC694.04c		chromosome_1	nuclear/mitochondrial metal-dependent protein hydrolase, human C12orf10 ortholog	0.143623	0.86339	0.0930032	0.911269	-0.0520403	0.950275
SPBC1773.07c	sbp1	chromosome_2	Ran GTPase binding protein Sbp1	0.209912	0.54909	0.093915	0.788025	-0.401688	0.256356
SPAC3H5.12c	rpl501	chromosome_1	60S ribosomal protein L5 (predicted)	-0.0350418	0.946054	0.102275	0.843504	-0.423829	0.416429
SPCC18B5.01c	bfr1	chromosome_3	plasma membrane brefeldin A efflux transporter Bfr1	-2.39935	0.106679	0.103214	0.943095	2.9515	0.0502361
SPAC2F7.11	nrd1	chromosome_1	RNA-binding protein Nrd1	-0.572206	0.342112	0.103737	0.861982	-0.277617	0.642409
SPAC12G12.07c		chromosome_1	conserved fungal protein	1.09007	0.0179509	0.104195	0.810051	0.0993365	0.818741
SPBC4F6.18c	arf1	chromosome_2	ADP-ribosylation factor, Arf family Arf1	0.188283	0.731082	0.105464	0.84721	-0.964301	0.0877075
SPAC1F5.04c	cdc12	chromosome_1	formin Cdc12	-1.18649	0.0274281	0.108051	0.832355	0.392201	0.444913
SPAC3A12.11c	cwf2	chromosome_1	Prp19 complex subunit, RNA-binding Cwf2	-0.270068	0.603212	0.113225	0.827087	-0.190808	0.713043
SPBC11C11.08	srp1	chromosome_2	SR family protein, human SRFS2 ortholog Srp1	1.52819	0.0491363	0.113945	0.878428	1.05453	0.165483
SPAC17A5.14	exo2	chromosome_1	exonuclease II Exo2	0.282142	0.594992	0.116768	0.825427	-0.222232	0.67506
SPCC188.02	par1	chromosome_3	protein phosphatase PP2A regulatory subunit B-56 Par1	-2.12644	0.0593247	0.120327	0.911698	-1.06277	0.332177
SPAC4F10.06	bud22	chromosome_1	ribosome small subunit biogenesis protein, BUD22 family (predicted)	0.180758	0.796587	0.12115	0.862783	0.246891	0.724945
SPBC25B2.09c	mrs1	chromosome_2	mitochondrial and cytoplasmic arginine-tRNA ligase Rrs1/Mrs1 (predicted)	1.05123	0.184247	0.122418	0.87481	-1.45158	0.0712536
SPAC25A8.01c	fft3	chromosome_1	SMARCAD1 family ATP-dependent DNA helicase Fft3	-1.07364	0.0931447	0.125199	0.840089	0.294813	0.635355
SPBC582.09	pex11	chromosome_2	peroxisomal biogenesis factor 11 (predicted)	-0.788884	0.415943	0.128485	0.893868	-0.853248	0.379509
SPBC3B9.02c	cwf28	chromosome_2	splicing factor Cwf28	2.60392	0.00492629	0.129668	0.878606	1.44302	0.0987957
SPBC32H8.12c	act1	chromosome_2	actin Act1	0.587594	0.19398	0.129995	0.770005	0.3797	0.396342
SPBC776.09	ste13	chromosome_2	ATP-dependent RNA helicase Ste13	0.171824	0.790288	0.132211	0.837815	0.251137	0.697752
SPCC16C4.09	sts5	chromosome_3	cytoplasmic P body 3'-5'-exoribonuclease, Dis3L2-related (predicted)	-0.162646	0.760332	0.1409	0.79153	0.253228	0.635316
SPCC1223.01		chromosome_3	ubiquitin-protein ligase E3 involved in rescue of stalled ribosomes (predicted)	1.03986	0.147171	0.142857	0.838642	0.921024	0.197032
SPAC20G8.09c	nat10	chromosome_1	rRNA/tRNA cytidine N-acetyltransferase	0.297951	0.75945	0.143255	0.882866	1.76485	0.079112
SPAC1834.04	hht1	chromosome_1	histone H3 h3.1	-0.0912821	0.895982	0.147124	0.833156	0.52274	0.456646
SPAC688.03c		chromosome_1	human AMMECR1 homolog	-0.423498	0.601985	0.151953	0.851182	-0.62546	0.442698
SPAC9.03c	brr2	chromosome_1	U5 snRNP complex subunit Brr2	-0.2933	0.630114	0.153805	0.800278	0.00502804	0.993397
SPCC576.01c	xan1	chromosome_3	alpha-ketoglutarate-dependent xanthine dioxygenase Xan1	0.525908	0.478829	0.154789	0.834084	-2.05739	0.00965452
SPCC1450.04	tef5	chromosome_3	translation elongation factor EF-1 beta subunit, guanyl-nucleotide exchange factor (eEF1B)	-1.77538	0.000555835	0.155468	0.730135	0.00563797	0.990007
SPAC4H3.10c	pyk1	chromosome_1	pyruvate kinase	-0.353332	0.31977	0.16024	0.649085	-0.0752822	0.830431
SPBC19C7.06	prs1	chromosome_2	cytoplasmic proline-tRNA ligase Prs1 (predicted)	-0.206979	0.770607	0.164888	0.816256	-1.99929	0.00892157
SPCC364.07	ser3	chromosome_3	D-3 phosphoglycerate dehydrogenase Ser3 (predicted)	-0.630893	0.132708	0.165434	0.686725	-1.7483	0.000242558
SPAC20H4.03c	tfs1	chromosome_1	general transcription elongation factor TFIIS	-0.0458844	0.950711	0.167324	0.821748	0.137371	0.853229
SPAC26A3.08	smb1	chromosome_1	Sm snRNP core protein Smb1	1.66623	0.0391196	0.172296	0.823291	0.823944	0.291088
SPAC26A3.05	chc1	chromosome_1	clathrin heavy chain Chc1 (predicted)	-0.877884	0.132182	0.172373	0.762154	-0.567633	0.323534
SPAC9E9.14	vps24	chromosome_1	ESCRT III complex subunit Vps24	1.15498	0.229167	0.172446	0.855349	-0.10165	0.914407
SPAC17A2.13c	rad25	chromosome_1	14-3-3 protein Rad25	0.241714	0.622438	0.173306	0.723722	-0.58353	0.240303
SPBC18H10.13	rps1402	chromosome_2	40S ribosomal protein S14 (predicted)	1.03029	0.0365515	0.17972	0.702545	-0.844304	0.082049
SPCC74.02c	ppn1	chromosome_3	mRNA cleavage and polyadenylation specificity factor complex associated protein	1.41061	0.151024	0.180994	0.850624	-0.306055	0.750317
SPBC651.01c	nog1	chromosome_2	ribosome export GTP binding protein Nog1 (predicted)	1.00763	0.321039	0.185084	0.853897	0.402447	0.689252
SPBC428.02c	eca39	chromosome_2	branched chain amino acid aminotransferase Eca39	-0.146922	0.914	0.188285	0.889935	-0.377329	0.781658
SPBC1773.10c	nrs1	chromosome_2	cytoplasmic asparagine-tRNA ligase Nrs1 (predicted)	-0.193786	0.663352	0.192122	0.666055	-0.820812	0.0743016
SPBC8D2.10c	rmt3	chromosome_2	type I ribosomal protein arginine N-methyltransferase Rmt3	1.32947	0.0841104	0.193676	0.795081	0.352071	0.637397
SPAC4F8.10c	stg1	chromosome_1	SM22/transgelin-like actin modulating protein Stg1	-3.39864	0.00318302	0.195956	0.851538	-1.44228	0.17665
SPBC365.06	pmt3	chromosome_2	ubiquitin-like protein modifier SUMO	1.34359	0.0620705	0.198071	0.775337	-0.236079	0.733826
SPAC1B9.02c	sck1	chromosome_1	serine/threonine protein kinase Sck1	2.93352	0.000225725	0.201666	0.767865	-0.328025	0.631669
SPAC29B12.06c	rcd1	chromosome_1	CCR4-Not complex RNA-binding protein subunit Rcd1	0.647471	0.445012	0.204008	0.808772	-0.127155	0.880056
SPBC365.04c		chromosome_2	RNA-binding protein, involved in ribosome biogenesis (predicted)	-0.318079	0.641869	0.207999	0.76072	-0.214145	0.753889
SPAC29E6.06c		chromosome_1	cytoplasmic cysteine-tRNA ligase Crs1 (predicted)	-1.7291	0.139714	0.210668	0.853887	0.755271	0.51091
SPAC23C4.08	rho3	chromosome_1	Rho family GTPase Rho3	-2.64171	6.11187e-05	0.21277	0.698977	-0.00194931	0.997169
SPBC1685.13	fhn1	chromosome_2	eisosome assembly protein Fhn1	0.261814	0.786319	0.213742	0.824799	1.42742	0.148143
SPBC19C7.01	mni1	chromosome_2	exon-exon junction complex disassembly factor, human partner of Y14 and mago ortholog (predicted)	-0.2933	0.675922	0.219553	0.754143	0.26216	0.708559
SPAPB1E7.14	iec5	chromosome_1	Ino80 complex subunit Iec5	-0.0802928	0.849983	0.224164	0.598416	-0.382973	0.37092
SPAC26H5.07c		chromosome_1	seven transmembrane receptor protein (predicted)	-1.97456	0.00700844	0.225689	0.738781	0.243141	0.719456
SPBC23E6.01c	cxr1	chromosome_2	splicing factor Cxr1	2.09485	0.0117641	0.225751	0.771222	-0.847061	0.280834
SPBC56F2.12	ilv5	chromosome_2	acetohydroxyacid reductoisomerase (predicted)	0.601388	0.406759	0.228943	0.750616	1.01912	0.165386
SPAC3G9.10c	rrp41	chromosome_1	exosomal 3'-to-5' phosphorolytic exoribonuclease Rrp41	1.15703	0.109637	0.230854	0.74307	-0.437788	0.535409
SPBC14C8.06	arc1	chromosome_2	ARP2/3 actin-organizing complex subunit Sop2	0.655209	0.242036	0.231089	0.675968	-1.28469	0.0272838
SPBC1604.08c	imp1	chromosome_2	importin alpha family nuclear import signal receptor adaptor Imp1	0.336738	0.733564	0.232993	0.813688	-0.215955	0.827074
SPBC1A4.09	pus7	chromosome_2	tRNA/snRNA/rRNA pseudouridine synthase Pus7 (predicted)	0.92573	0.112082	0.23463	0.679525	0.51312	0.36956
SPBC1289.03c	spi1	chromosome_2	Ran GTPase Spi1	-0.10711	0.863417	0.234822	0.706407	-0.475677	0.44756
SPCC1902.01	gaf1	chromosome_3	transcription factor Gaf1	0.027026	0.961471	0.235418	0.674475	-0.209302	0.708725
SPCC1827.01c	utp25	chromosome_3	U3 associated protein Utp25 (predicted)	-0.2933	0.410025	0.238851	0.501236	-0.155793	0.660011
SPCC1827.03c		chromosome_3	acetyl-CoA ligase (predicted)	-1.73536	0.0099419	0.240859	0.700785	0.80078	0.208422
SPAC6G9.09c	rpl2401	chromosome_1	60S ribosomal protein L24 (predicted)	0.123331	0.851116	0.243441	0.711319	-0.244252	0.710403
SPBP8B7.07c	set6	chromosome_2	histone lysine methyltransferase Set6 (predicted)	-0.2933	0.719936	0.249364	0.760403	-1.31122	0.117998
SPAC6B12.15	cpc2	chromosome_1	RACK1 ortholog Cpc2	0.154402	0.692008	0.249867	0.522613	-0.813476	0.0453471
SPBC13E7.07		chromosome_2	Schizosaccharomyces specific protein	-0.0327008	0.973004	0.25081	0.795347	-0.314262	0.745287
SPBP8B7.11	nxt3	chromosome_2	ubiquitin protease cofactor Nxt3 (predicted)	0.607882	0.246905	0.252742	0.626124	-0.012784	0.98029
SPBC14F5.04c	pgk1	chromosome_2	phosphoglycerate kinase Pgk1 (predicted)	-0.0827785	0.821657	0.253089	0.492659	-0.401401	0.280142
SPAC926.09c	fas1	chromosome_1	fatty acid synthase beta subunit Fas1	-0.600352	0.507749	0.254029	0.778445	0.176588	0.844873
SPBC1271.15c	mti2	chromosome_2	mitochondrial translation initiation factor IF-2Mt/Mti2 (predicted)	-0.2933	0.56043	0.266306	0.596835	0.998333	0.0559388
SPCC622.12c	gdh1	chromosome_3	NADP-specific glutamate dehydrogenase Gdh1 (predicted)	-0.068135	0.925774	0.269386	0.712994	0.908798	0.221382
SPAC30C2.04	asc1	chromosome_1	cofactor for cytoplasmic methionyl-and glutamyl-tRNA synthetases Asc1 (predicted)	-0.433325	0.528712	0.272394	0.691346	-0.640368	0.354259
SPAC17G8.01c	trl1	chromosome_1	tRNA ligase Trl1 (predicted)	0.569777	0.270874	0.272484	0.594823	-0.902122	0.0870734
SPAC688.11	end4	chromosome_1	Clathrin adaptor End4	-0.527193	0.505794	0.274507	0.728087	-1.14013	0.157083
SPBC26H8.08c	grn1	chromosome_2	GTPase Grn1	2.18543	0.00407114	0.274754	0.692898	0.0829089	0.904996
SPAC23H3.02c	ini1	chromosome_1	RING finger-like protein Ini1	1.17387	0.0495738	0.27484	0.632469	-0.920745	0.117773
SPBC2D10.04	aly2	chromosome_2	arrestin Aly1 related Aly2	-0.0319244	0.968482	0.277008	0.732034	0.67158	0.409285
SPAC11E3.13c	gas5	chromosome_1	cell wall protein 1,3-beta-glucanosyltransferase Gas5 (predicted)	-1.73193	0.0137652	0.27778	0.67343	-0.600277	0.365743
SPBC16C6.05	tma22	chromosome_2	translation machinery associated protein ortholog Tma22 (predicted)	3.07552	3.98488e-05	0.281685	0.649245	-0.403698	0.515497
SPAC14C4.14	atp1	chromosome_1	F1-FO ATP synthase alpha subunit	0.540413	0.101346	0.284838	0.377989	-0.685519	0.0409126
SPCC1620.08	lsc2	chromosome_3	succinate-CoA ligase beta subunit Lsc2 (predicted)	-1.36425	0.0521415	0.289246	0.668566	-0.277663	0.681046
SPAC4A8.11c	fas2	chromosome_1	fatty acid synthase alpha subunit Fas2	-2.07028	0.0100935	0.291358	0.697495	-0.413568	0.581741
SPAC637.05c	vma2	chromosome_1	V-type ATPase V1 subunit B	-0.122989	0.762089	0.292124	0.4741	0.191096	0.638544
SPAC30D11.14c		chromosome_1	KH domain RNA-binding protein, involved in splicing (predicted)	0.224126	0.667977	0.293622	0.574706	0.124322	0.811688
SPAC823.08c	rrp3	chromosome_1	ATP-dependent RNA helicase Rrp3 (predicted)	-1.32134	0.149198	0.295388	0.74186	0.440032	0.624139
SPCC16C4.03	pin1	chromosome_3	peptidyl-prolyl cis-trans isomerase Pin1	-1.45121	0.0103495	0.297386	0.57357	-0.953482	0.0798811
SPAC16.04	dus3	chromosome_1	tRNA dihydrouridine synthase Dus3 (predicted)	0.0897989	0.892672	0.297402	0.655607	0.373135	0.576248
SPAC17G6.06	rps2401	chromosome_1	40S ribosomal protein S24 (predicted)	-0.509746	0.32799	0.305185	0.555534	-1.30582	0.0173298
SPCC1919.07		chromosome_3	Schizosaccharomyces specific protein	1.17831	0.0804755	0.306638	0.639008	0.352609	0.589886
SPBC16A3.02c		chromosome_2	mitochondrial CH-OH group oxidoreductase, human RTN4IP1 ortholog, implicated in mitochondrial organization or tethering	-0.135106	0.715355	0.309748	0.405941	-0.803884	0.0381242
SPAC637.07	moe1	chromosome_1	translation initiation factor eIF3d Moe1	0.501499	0.345109	0.310041	0.557117	0.0644933	0.902451
SPBC2G5.01		chromosome_2	ER protein involved in ER-nucleus signaling (predicted)	-0.089387	0.939158	0.312997	0.789406	1.49236	0.210202
SPAC5H10.06c	adh4	chromosome_1	alcohol dehydrogenase Adh4	-1.09884	0.0225238	0.317602	0.487444	-0.248309	0.58646
SPAC2C4.07c	dis32	chromosome_1	3'-5'-exoribonuclease activity Dis3L2	0.469503	0.505448	0.318262	0.650849	-0.0503279	0.942823
SPAC3H1.07	aru1	chromosome_1	arginase Aru1	-0.937367	0.141188	0.320165	0.607945	0.830984	0.189944
SPCC126.06	twf1	chromosome_3	twinfilin (predicted)	0.169392	0.788275	0.320268	0.612337	-0.064014	0.919111
SPBC3H7.11	trm141	chromosome_2	serine tRNA C32 methyl transferase Trm141	1.83138	0.0117109	0.322732	0.634702	0.0843794	0.900918
SPAC9G1.12	cpd1	chromosome_1	tRNA (m1A) methyltransferase complex catalytic subunit Cpd1	1.3024	0.22551	0.330499	0.75493	0.826253	0.437666
SPBC16H5.12c		chromosome_2	DUF2433 metallo phosphatase superfamily conserved fungal protein	-0.394793	0.402212	0.337534	0.472987	-0.150893	0.747276
SPBC25H2.07	tif11	chromosome_2	translation initiation factor eIF1A	-0.704464	0.0490394	0.341537	0.324644	0.0933832	0.785684
SPBC2G2.03c	sbh1	chromosome_2	translocon beta subunit Sbh1 (predicted)	-0.757708	0.0554561	0.342065	0.372319	-0.214668	0.57359
SPAC17A5.03	rpl301	chromosome_1	60S ribosomal protein L3	0.487863	0.288573	0.345952	0.449013	-0.632326	0.172384
SPAP7G5.05	rpl1002	chromosome_1	60S ribosomal protein L10	0.663594	0.295694	0.348812	0.579341	-0.265506	0.672632
SPAC23C11.09	ala1	chromosome_1	mitochondrial and cytoplasmic alanine-tRNA ligase Ala1 (predicted)	-0.486712	0.379673	0.351601	0.524037	-0.283689	0.606658
SPAC227.18	lys3	chromosome_1	saccharopine dehydrogenase Lys3	-0.733396	0.166945	0.35398	0.498007	0.659289	0.212315
SPAC18G6.03	ypt3	chromosome_1	Rab11 family GTPase Ypt3	-0.497087	0.413117	0.357965	0.554252	0.0427258	0.943517
SPAC3A12.18	zwf1	chromosome_1	glucose-6-phosphate 1-dehydrogenase (predicted)	0.410569	0.572491	0.361432	0.619033	-1.42046	0.0594123
SPCC895.09c	ucp12	chromosome_3	ATP-dependent RNA helicase Ucp12, unknown location and role, implicated in mRNA processing (predicted)	-3.06192	0.00047637	0.364807	0.634078	0.0290332	0.969709
SPAC1142.01	rqc1	chromosome_1	ribosome quality control complex (RQC) complex subunit Rqc1	-1.72252	0.0108086	0.365303	0.562994	0.0976317	0.876742
SPBC25H2.16c	gga22	chromosome_2	Golgi localized Arf binding gamma-adaptin ortholog Gga22	0.17096	0.718869	0.36615	0.442985	-0.108305	0.819463
SPBC20F10.01	gar1	chromosome_2	box H/ACA snoRNP complex subunit Gar1	1.98422	0.0221718	0.368276	0.653753	0.216972	0.791286
SPBC17A3.07	pgr1	chromosome_2	mitochondrial glutathione reductase Pgr1	0.645355	0.413744	0.368378	0.639216	1.20016	0.13507
SPAC27F1.07	ost1	chromosome_1	dolichyl-diphospho-oligosaccharide-protein glycosyltransferase Ost1 (predicted)	-2.43389	0.00414902	0.369814	0.634247	-0.112953	0.884212
SPAC6F12.16c	mtr4	chromosome_1	TRAMP complex ATP-dependent RNA helicase subunit Mtr4	0.308651	0.680371	0.36989	0.621799	1.18364	0.122958
SPAC1F7.12	yak3	chromosome_1	aldose reductase ARK13 family YakC, implicated in cellular detoxification from family members	-1.13013	0.0523649	0.371287	0.508673	1.02888	0.075398
SPAC4D7.08c	ade4	chromosome_1	amidophosphoribosyltransferase Ade4	0.958799	0.0500161	0.374417	0.428016	0.496524	0.29565
SPAC26A3.16	dsk2	chromosome_1	UBA domain protein Dph1/Dsk2	-1.39822	0.00967955	0.375808	0.456918	0.028445	0.95483
SPBC1D7.04	mlo3	chromosome_2	RNA binding protein Mlo3	-0.163685	0.712482	0.377954	0.397749	-0.26679	0.549027
SPAC17H9.07	srp21	chromosome_1	signal recognition particle subunit Srp21 (predicted)	-1.29119	0.00253199	0.384415	0.325052	-0.160372	0.678798
SPCC4B3.03c	mam301	chromosome_3	multi-pass membrane and CBS domain protein, implicated in magnesium homeostasis and endomembrane organization (predicted)	0.417847	0.671107	0.386995	0.694036	1.19752	0.229941
SPBC3D6.15	rps2501	chromosome_2	40S ribosomal protein S25 (predicted)	1.56695	0.222961	0.38793	0.759395	-2.06682	0.111978
SPCC825.05c	pwi1	chromosome_3	splicing coactivator Srm160 (predicted)	-0.0184257	0.970253	0.388681	0.434506	0.562226	0.261632
SPAC1D4.04	cct2	chromosome_1	chaperonin-containing T-complex beta subunit Cct2	0.0989707	0.918108	0.390312	0.685613	-0.0178915	0.985169
SPAC29E6.02	prp3	chromosome_1	U4/U6 x U5 tri-snRNP complex subunit Prp3	-0.2933	0.429891	0.39157	0.294428	0.0647622	0.860756
SPCC576.09	rps20	chromosome_3	40S ribosomal protein S20 (predicted)	1.47879	0.00241707	0.392371	0.376808	-0.784556	0.0844406
SPCC584.04	sup35	chromosome_3	cytoplasmic translation release factor class II eRF3	1.20884	0.0344253	0.396786	0.468567	-0.109157	0.841136
SPBC14F5.06	rli1	chromosome_2	iron-sulfur ATPase involved in ribosome biogenesis and translation Rli1 (predicted)	-0.284084	0.806398	0.398211	0.731359	0.176712	0.878787
SPAC4H3.01		chromosome_1	DNAJ domain protein Caj1/Djp1 type (predicted)	-0.139007	0.818934	0.401751	0.509965	0.188882	0.755875
SPBC902.04	rmn1	chromosome_2	RNA-binding protein	-0.491025	0.654652	0.405334	0.711756	0.790247	0.473091
SPBC215.09c	erg10	chromosome_2	acetyl-CoA C-acetyltransferase Erg10 (predicted)	-0.443238	0.210862	0.406878	0.249509	0.330162	0.34777
SPBC17G9.11c	pyr1	chromosome_2	pyruvate carboxylase Pyr1	-0.908935	0.163449	0.407268	0.525495	-0.490564	0.445301
SPAC16E8.15	tif45	chromosome_1	translation initiation factor eIF4E, 4F complex subunit	-0.113742	0.873482	0.409316	0.567874	-0.562929	0.433555
SPBC14F5.03c	kap123	chromosome_2	karyopherin/importin beta family nuclear import signal receptor Kap123	0.899754	0.151179	0.416797	0.498691	0.432388	0.482931
SPAC12G12.13c	cid14	chromosome_1	TRAMP complex poly(A) polymerase subunit Cid14	1.03856	0.0208516	0.418456	0.328636	0.498764	0.246277
SPBC24C6.11	cwf14	chromosome_2	G10 protein	0.558198	0.675618	0.424104	0.750349	-1.15381	0.389948
SPAC6G10.10c		chromosome_1	human mmtag2 ortholog, implicated in splicing	1.35214	0.0963182	0.425805	0.59062	1.11496	0.166351
SPCC285.15c	rps2802	chromosome_3	40S ribosomal protein S28, Rps2802	0.343436	0.49007	0.426609	0.392552	-0.450136	0.367397
SPCC5E4.07	rpl2802	chromosome_3	60S ribosomal protein L27/L28	-0.491024	0.510113	0.429553	0.564053	-0.242288	0.744309
SPCC330.03c		chromosome_3	NADPH-hemoprotein reductase (predicted)	-1.65452	0.00611473	0.4302	0.441633	0.391646	0.483153
SPAC1327.01c		chromosome_1	transcription factor, zf-fungal binuclear cluster type (predicted)	-0.29412	0.454337	0.433058	0.273914	0.745319	0.0659585
SPAC823.04	rrp36	chromosome_1	rRNA processing protein Rrp36 (predicted)	0.0525996	0.939639	0.433687	0.534077	2.70968	0.000620019
SPBC428.15		chromosome_2	Obg-like ATPase, human OLA1 ortholog (predicted)	0.301533	0.736294	0.43463	0.627833	0.84407	0.349786
SPAC694.02		chromosome_1	DEAD/DEAH box helicase, human DDL60 and DDL60L ortholog, implicated in mRNA degradation	0.624878	0.391569	0.434689	0.549557	0.500441	0.491398
SPAC22A12.16	acl2	chromosome_1	ATP-citrate synthase subunit 2 (predicted)	0.791154	0.0312519	0.437658	0.217605	0.403343	0.254703
SPBC146.05c	cwf25	chromosome_2	complexed with Cdc5 protein Cwf25	0.499431	0.507103	0.439794	0.558709	0.949661	0.21266
SPAC11E3.15	rpl22	chromosome_1	60S ribosomal protein L22 (predicted)	0.099583	0.871107	0.440807	0.474926	-0.643117	0.300159
SPBC19C2.14	smd3	chromosome_2	Sm snRNP core protein Smd3	1.78812	0.00980771	0.442999	0.493371	0.24986	0.698271
SPBC839.05c	rps1701	chromosome_2	40S ribosomal protein S17 (predicted)	0.520098	0.272037	0.44487	0.345813	-0.649708	0.17305
SPAC27D7.02c	grp1	chromosome_1	Golgi GRIP domain protein Grp1 (predicted)	1.74187	0.12189	0.448511	0.683258	-0.718862	0.514305
SPAC1002.09c	dld1	chromosome_1	dihydrolipoamide dehydrogenase Dld1	-2.19598	0.086367	0.449198	0.717621	-0.310055	0.80274
SPAC23C11.15	pst2	chromosome_1	Clr6 histone deacetylase complex subunit Pst2	-0.282554	0.814732	0.449782	0.709391	-0.0463211	0.969339
SPAC21E11.06	tif224	chromosome_1	translation initiation factor eIF2B delta subunit	0.439186	0.567374	0.451156	0.556937	-0.668756	0.385993
SPBC17A3.08		chromosome_2	TatD homolog (predicted)	-0.249195	0.629552	0.45175	0.384562	-0.966903	0.0701874
SPBC16H5.02	pfk1	chromosome_2	6-phosphofructokinase pfk1	-0.42309	0.322424	0.45432	0.288759	-0.609902	0.158293
SPCC757.09c	rnc1	chromosome_3	KH domain RNA-binding protein Rnc1	0.0749022	0.83988	0.457672	0.224146	0.042063	0.909636
SPCC1795.04c	pre10	chromosome_3	20S proteasome complex subunit alpha 7, Pre10	0.74592	0.133678	0.458912	0.349002	0.221148	0.649412
SPBC12C2.03c		chromosome_2	methionine synthase reductase (predicted)	-0.762347	0.215101	0.461484	0.448293	0.634307	0.29991
SPBC1289.04c	pob1	chromosome_2	Boi family protein	0.133459	0.830016	0.461841	0.459949	-0.249453	0.688585
SPAC22F8.10c	sap145	chromosome_1	U2 snRNP-associated protein Sap145	1.5448	0.0071085	0.465788	0.383325	0.673382	0.211499
SPBC23G7.05	sui1	chromosome_2	translation initiation factor eIF1	-1.28142	0.0183762	0.469315	0.363031	-0.837399	0.111127
SPCC18.07	rpc53	chromosome_3	DNA-directed RNA polymerase III complex subunit Rpc53 (predicted)	0.89976	0.213121	0.471023	0.509467	-0.0536956	0.939778
SPCP1E11.11	puf6	chromosome_3	pumilio family RNA-binding protein Puf6 (predicted)	0.221874	0.815645	0.476638	0.617209	0.537701	0.573141
SPBC354.07c		chromosome_2	sterol intermembrane transfer protein (predicted)	-2.50609	5.29467e-06	0.480795	0.273762	-0.277914	0.523449
SPBC13E7.01	cwf22	chromosome_2	splicing factor Cwf22	-0.752479	0.415384	0.481521	0.600717	1.08237	0.244897
SPBC2G2.12	hrs1	chromosome_2	mitochondrial and cytoplasmic histidine-tRNA ligase Hrs1 (predicted)	0.164146	0.730468	0.485229	0.313182	-0.337485	0.480549
SPAC1F7.04	rho1	chromosome_1	Rho family GTPase Rho1	-1.06726	0.04017	0.493114	0.325946	-0.123245	0.804203
SPAC19A8.13	usp101	chromosome_1	U1 snRNP-associated protein Usp101	0.00390817	0.993026	0.493444	0.275875	0.642705	0.159402
SPAC22G7.04	pan2	chromosome_1	PAN complex (poly(A)-specific ribonuclease) ubiquitin C-terminal hydrolase subunit Pan2 (predicted)	1.81015	0.0314443	0.498539	0.534851	-0.202384	0.800412
SPBC839.17c	fkh1	chromosome_2	FKBP-type peptidyl-prolyl cis-trans isomerase Fkh1	0.617454	0.504336	0.498586	0.589169	-1.07412	0.249919
SPBPB7E8.02		chromosome_2	PSP1 family protein	0.556916	0.639768	0.50301	0.672365	0.348935	0.769019
SPCC364.06	nap1	chromosome_3	histone H2A-H2B chaperone Nap1	0.554652	0.440632	0.505253	0.481927	-0.972128	0.182101
SPBC1289.07c	rpc40	chromosome_2	DNA-directed RNA polymerase I and III subunit Rpc40	-2.23512	0.0350627	0.505752	0.617628	0.26608	0.792435
SPAP7G5.02c	gua2	chromosome_1	GMP synthase [glutamine-hydrolyzing] Gua2 (predicted)	-1.19174	0.0844403	0.507934	0.450307	-0.207743	0.756311
SPAC1B3.12c	rpb10	chromosome_1	DNA-directed RNA polymerase I, II, and III subunit Rpb10	-0.984229	0.42299	0.511237	0.675738	0.225011	0.853716
SPAC56F8.03	tif52	chromosome_1	translation initiation factor eIF5B Tif52 (predicted)	0.955554	0.231309	0.512308	0.516466	-0.306798	0.696785
SPAC23G3.01	rpb2	chromosome_1	RNA polymerase II complex subunit Rpb2	-0.731192	0.386634	0.512751	0.542141	0.901401	0.28783
SPAC17G8.09	shg1	chromosome_1	Set1C complex subunit Shg1	-1.31626	0.102011	0.51346	0.513369	-0.788509	0.318477
SPAC6F12.02	rst2	chromosome_1	transcription factor Rst2	0.232159	0.858157	0.514239	0.692589	1.34258	0.306624
SPAC25B8.11		chromosome_1	transcription factor (predicted)	-0.2933	0.495425	0.515043	0.236013	-0.750071	0.0894734
SPAC1002.18	urg3	chromosome_1	DUF1688 family fungal conserved protein, implicated in uracil or riboflavin metabolism	-0.87816	0.0356697	0.519596	0.200103	0.674155	0.100317
SPBC1703.03c	syo2	chromosome_2	armadillo repeat protein, involved in nucleocytoplasmic transport Syo2 (predicted)	0.312394	0.600067	0.520334	0.384957	1.01983	0.0957449
SPAC57A10.11c	mia40	chromosome_1	mitochondrial Mia40-Erv1 disulfide relay system thiol oxidase subunit Mia40 (predicted)	0.218301	0.774526	0.525754	0.492069	-0.911346	0.238343
SPCC736.11	ago1	chromosome_3	argonaute	0.17232	0.666936	0.53085	0.192153	1.32691	0.00265844
SPAC1486.08	cox16	chromosome_1	mitochondrial copper chaperone for cytochrome c oxidase Cox16 (predicted)	-1.68477	0.139599	0.532374	0.633513	0.512724	0.64604
SPBC29A3.02c	his7	chromosome_2	phosphoribosyl-AMP cyclohydrolase/phosphoribosyl- ATP pyrophosphohydrolase His7	-0.825743	0.404413	0.532951	0.588874	-0.833647	0.399997
SPBP8B7.21	ubp3	chromosome_2	ubiquitin C-terminal hydrolase Ubp3	0.94031	0.196369	0.536283	0.455811	-1.85632	0.0149417
SPAPB21F2.03	slx9	chromosome_1	ribosome biogenesis protein Slx9 (predicted)	-0.2933	0.633314	0.540568	0.382011	-0.799476	0.200298
SPAP7G5.04c	lys1	chromosome_1	aminoadipate-semialdehyde dehydrogenase	0.953651	0.0550507	0.542429	0.262509	0.720087	0.14081
SPAC926.04c	hsp90	chromosome_1	Hsp90 chaperone	-0.361601	0.406045	0.544173	0.215342	-0.101026	0.815198
SPBC17G9.09	tif213	chromosome_2	translation initiation factor eIF2 gamma subunit	-0.843574	0.165916	0.558878	0.353174	-1.37418	0.0287405
SPAC20G4.06c	adf1	chromosome_1	actin depolymerizing factor, cofilin	-0.104989	0.798853	0.559571	0.182425	-0.0945472	0.818466
SPCC1183.07	rrp5	chromosome_3	U3 snoRNP-associated protein Rrp5 (predicted)	0.451709	0.593342	0.559993	0.508657	0.369662	0.661788
SPBC1604.21c	ptr3	chromosome_2	ubiquitin activating enzyme E1	0.419904	0.640602	0.56203	0.532806	-0.260821	0.771508
SPAC15E1.04	hal3	chromosome_1	thymidylate synthase / phosphopantothenoylcysteine decarboxylase / protein phosphatase inhibitor moonlighting protein Hal3	0.929659	0.226787	0.564747	0.458386	0.163595	0.829016
SPAC1093.02	pdx3	chromosome_1	pyridoxamine 5'-phosphate oxidase Pdx3 (predicted)	-0.00872372	0.981982	0.569339	0.149528	0.225345	0.561063
SPAC3F10.03	grs1	chromosome_1	mitochondrial and cytoplasmic glycine-tRNA ligase Grs1	-0.092776	0.883355	0.571616	0.370043	0.206902	0.743744
SPAC3F10.16c		chromosome_1	GTP binding protein, HSR1-related (predicted)	-1.59387	0.0591508	0.574143	0.482164	-0.577576	0.479576
SPAC4G9.03	adk1	chromosome_1	adenylate kinase Adk1	0.984794	0.165073	0.579729	0.407519	-2.03522	0.00687169
SPBC365.15	alp4	chromosome_2	gamma tubulin complex Spc97/GCP2 subunit Alp4	-2.25116	0.137406	0.580847	0.695129	-0.0510304	0.972489
SPBC4.02c		chromosome_2	rRNA 2'-O-methyltransferase fibrillarin-like (predicted)	-0.2933	0.683781	0.584536	0.419369	0.925927	0.205495
SPCC31H12.04c	rpl1202	chromosome_3	60S ribosomal protein L12.1/L12A	-0.0535997	0.9344	0.587145	0.371329	-1.02108	0.126273
SPAC227.02c	rrp15	chromosome_1	rRNA processing protein Rrp15 (predicted)	-0.31081	0.6018	0.592093	0.323851	0.0809345	0.891623
SPBC106.15	idi1	chromosome_2	isopentenyl-diphosphate delta-isomerase Idi1	-0.224852	0.640517	0.592811	0.224531	0.373922	0.439288
SPBC2D10.08c		chromosome_2	mitochondrial ribosomal protein subunit Yml6 (predicted)	-0.2933	0.728851	0.594515	0.484004	-0.768587	0.367241
SPCC970.05	rpl3601	chromosome_3	60S ribosomal protein L36	-0.0863558	0.905577	0.59768	0.414927	-1.58852	0.0373678
SPCC1739.13	ssa2	chromosome_3	heat shock protein Ssa2	0.259763	0.523941	0.599607	0.148593	0.0302473	0.940592
SPAC821.10c	sod1	chromosome_1	superoxide dismutase Sod1	-0.496435	0.254827	0.602508	0.169688	0.534416	0.221263
SPAC17H9.05	ebp2	chromosome_1	rRNA processing protein Ebp2	-0.0436646	0.950004	0.609538	0.385255	1.58953	0.0301186
SPAC32A11.04c	tif212	chromosome_1	translation initiation factor eIF2 beta subunit (predicted)	-0.308125	0.522505	0.622813	0.202063	-0.444154	0.358872
SPCC1739.01		chromosome_3	zf-CCCH type zinc finger protein	0.242031	0.70327	0.623511	0.330625	0.1654	0.79446
SPCC16A11.11	mrpl31	chromosome_3	mitochondrial ribosomal protein subunit L31 (predicted)	0.498317	0.566587	0.623982	0.473879	-0.562334	0.518222
SPBC776.15c	kgd2	chromosome_2	dihydrolipoamide S-succinyltransferase, e2 component of oxoglutarate dehydrogenase complex Kdg2 (predicted)	-1.26411	0.0101292	0.628055	0.177955	-1.15327	0.0176944
SPAC24B11.06c	sty1	chromosome_1	MAP kinase Sty1	-0.807811	0.20125	0.62931	0.316151	-0.230422	0.711029
SPAC10F6.16	igo1	chromosome_1	endosulfine (ENSA) serine/threonine protein kinase Igo1	-0.0575305	0.951282	0.634888	0.502211	-0.1753	0.852363
SPBC26H8.06	grx4	chromosome_2	CIA machinery monothiol glutaredoxin Grx4	-0.46874	0.458449	0.634889	0.317626	-0.174779	0.781124
SPAC6B12.09	trm10	chromosome_1	tRNA m(1)G methyltransferase Trm10	1.05135	0.376697	0.635423	0.591183	1.24266	0.29767
SPAC1751.04	loc1	chromosome_1	ribosome biogenesis protein Loc1 (predicted)	-0.2933	0.819284	0.636702	0.620647	0.575211	0.654623
SPBC18E5.04	rpl1001	chromosome_2	60S ribosomal protein L10	0.537947	0.368996	0.641145	0.286031	0.324646	0.585662
SPAPB8E5.07c	rrp12	chromosome_1	rRNA processing protein Rrp12 (predicted)	-1.58228	0.118952	0.645016	0.515956	0.586034	0.554752
SPAC31A2.03	mrp11	chromosome_1	mitochondrial ribosomal protein subunit L11 (predicted)	-1.56708	0.247447	0.647382	0.628728	-0.160165	0.904557
SPCC962.04	rps1201	chromosome_3	40S ribosomal protein S12 (predicted)	0.317672	0.59726	0.649653	0.284421	-1.23746	0.0478977
SPBC365.11	grp2	chromosome_2	Golgi GRIP domain protein Grp2 (predicted)	0.515552	0.48489	0.652716	0.378029	0.807399	0.277602
SPCC306.07c		chromosome_3	U3 snoRNP-associated protein Cic1/Utp30 family (predicted)	-0.472773	0.301495	0.653556	0.15737	1.16367	0.0157942
SPBC3F6.03	trr1	chromosome_2	thioredoxin reductase Trr1	-1.35572	0.0124988	0.657533	0.202438	0.307982	0.545046
SPBC3D6.08c	lsm1	chromosome_2	mRNA decapping complex subunit (predicted)	1.53884	0.0776212	0.661669	0.435558	0.169415	0.840807
SPAC22G7.05	kri1	chromosome_1	ribosome biogenesis protein Kri1 (predicted)	0.493696	0.56158	0.665748	0.435092	1.12158	0.19372
SPAC4A8.16c	tif33	chromosome_1	translation initiation factor eIF3c	0.64607	0.12133	0.678251	0.104745	-0.14568	0.720326
SPAC20G4.08	pdc1	chromosome_1	P-body assembly protein	0.758834	0.144524	0.679171	0.189596	-0.338353	0.507571
SPCC23B6.01c		chromosome_3	sterol intermembrane transfer protein (predicted)	1.38442	0.0421189	0.680624	0.301528	-0.417268	0.523523
SPAC31A2.12	rod1	chromosome_1	arrestin/PY protein involved in ubiquitin-mediated endocytosis Rod1 (predicted)	-1.19293	0.278422	0.681043	0.532597	-0.532233	0.625209
SPBC776.13	cnd1	chromosome_2	condensin complex non-SMC subunit Cnd1	-0.2933	0.731073	0.688471	0.422422	-1.38574	0.113549
SPCC31H12.03c	mlo1	chromosome_3	RNA binding protein (predicted)	0.686159	0.0855963	0.689485	0.0841816	-0.0921704	0.811652
SPBC1709.05	sks2	chromosome_2	heat shock protein, ribosome associated molecular chaperone Sks2	-0.305162	0.38862	0.693398	0.0575892	0.476258	0.183315
SPCC63.14	eis1	chromosome_3	eisosome assembly protein eis1	-0.364004	0.685409	0.694797	0.441495	-1.62807	0.0791919
SPAC4C5.02c	ryh1	chromosome_1	GTPase Ryh1	0.219771	0.837514	0.695254	0.518184	1.60321	0.143612
SPAC9E9.03	leu2	chromosome_1	3-isopropylmalate dehydratase Leu2	-1.15796	0.0100575	0.695902	0.105864	-0.576338	0.176755
SPBC4F6.04	rpl2502	chromosome_2	60S ribosomal protein L25 (predicted)	0.154793	0.833414	0.704134	0.343136	0.159433	0.828502
SPBC146.07	prp2	chromosome_2	U2AF large subunit (U2AF-59)	-0.270785	0.71182	0.707639	0.338411	0.328901	0.653874
SPBC3B8.03	lys9	chromosome_2	saccharopine dehydrogenase	2.56361	0.000285228	0.714183	0.248081	0.759484	0.220184
SPAC11G7.02	pub1	chromosome_1	HECT-type ubiquitin-protein ligase E3 Pub1	0.314018	0.735921	0.715284	0.444659	0.0804637	0.931055
SPBC15C4.05	dhx29	chromosome_2	ATP-dependent RNA helicase, human DHX29 ortholog (predicted)	0.676653	0.0645646	0.71617	0.0514071	0.177656	0.615501
SPAC30D11.13	hus5	chromosome_1	SUMO conjugating enzyme E2 Hus5	-0.2933	0.709966	0.717508	0.366427	-2.03719	0.0152842
SPBC16G5.05c	scs2	chromosome_2	VAP family protein Scs2	0.926217	0.0403258	0.719127	0.105268	-0.0852785	0.843403
SPAC4F8.14c	hcs1	chromosome_1	3-hydroxy-3-methylglutaryl-CoA synthase	-1.32548	0.0458385	0.723397	0.261532	0.486782	0.446593
SPAC23C11.16	plo1	chromosome_1	Polo kinase Plo1	1.12625	0.195879	0.731428	0.396063	-1.25479	0.151296
SPAC1565.05	utp8	chromosome_1	t-UTP complex subunit Utp8 (predicted)	-2.05984	0.00706389	0.732767	0.304781	1.8669	0.0133991
SPAC3G9.06	frs2	chromosome_1	cytoplasmic phenylalanine-tRNA ligase alpha subunit Frs2 (predicted)	-0.208271	0.72067	0.734347	0.214365	-0.27086	0.642233
SPAC1F5.10	fal1	chromosome_1	exon junction complex subunit, ATP-dependent RNA helicase Fal1	-0.311321	0.758568	0.734974	0.47011	-0.406356	0.688492
SPAC23C4.02	crn1	chromosome_1	actin binding protein, coronin Crn1	0.217774	0.731148	0.738252	0.250235	-0.383432	0.546259
SPAC22F8.09	rrp16	chromosome_1	rRNA processing protein Rrp16 (predicted)	0.277367	0.736194	0.738257	0.373369	-0.111282	0.892371
SPBC530.08		chromosome_2	membrane-tethered transcription factor (predicted)	-0.407827	0.882541	0.738502	0.789157	3.01608	0.28045
SPBC336.02	cdh1	chromosome_2	18S rRNA dimethylase Cdh1 (predicted)	0.17626	0.740542	0.746562	0.168887	-0.12499	0.814246
SPAC343.05	vma1	chromosome_1	V-type ATPase V1 domain, subunit A	-2.31564	0.00183567	0.747859	0.268749	0.276479	0.679222
SPAC1D4.14	tho2	chromosome_1	THO complex subunit Tho2 (predicted)	0.927575	0.126112	0.766939	0.202453	0.972112	0.109765
SPAC637.09	rex1	chromosome_1	3'-5'- exoribonuclease Rex1 (predicted)	0.960381	0.423961	0.771742	0.519529	0.698801	0.559448
SPAC3A11.02	cps3	chromosome_1	zf-CCCH type zinc finger protein, unknown biological role Cps3, potential makorin ortholog	1.28248	0.14434	0.775649	0.370408	0.0681414	0.936742
SPAC22A12.11	dak1	chromosome_1	dihydroxyacetone kinase Dak1	-0.322515	0.63206	0.777735	0.253707	-1.70751	0.0169565
SPBC418.01c	his4	chromosome_2	imidazoleglycerol-phosphate synthase His4	0.17589	0.757552	0.778158	0.179975	-0.149094	0.793519
SPAC3C7.04		chromosome_1	transcription factor (predicted)	-0.305681	0.729693	0.779574	0.381519	-0.518007	0.559121
SPAC6G10.09	gls1	chromosome_1	alpha glucosidase I Gls1 (predicted)	1.60987	0.176242	0.783101	0.504274	0.0822298	0.943833
SPAC57A10.10c	sla1	chromosome_1	La protein homolog	1.25792	0.0354777	0.786755	0.176018	1.53813	0.0118326
SPCC297.05		chromosome_3	DENN domain Rab GDP-GTP exchange factor, implicated in endosomal transport (predicted)	1.17611	0.122769	0.788126	0.294339	0.50186	0.501306
SPAC15E1.03	rpl42	chromosome_1	60S ribosomal protein L36/L42	-1.20596	0.414107	0.793507	0.589508	-0.985104	0.503684
SPBC4C3.12	2001-09-01	chromosome_2	forkhead transcription factor Sep1	-0.2933	0.650659	0.79539	0.225726	0.133784	0.836074
SPAC4G9.16c	rpl901	chromosome_1	60S ribosomal protein L9	1.27542	0.0618102	0.796487	0.232904	-1.22877	0.0712362
SPCC1672.05c	yrs1	chromosome_3	cytoplasmic tyrosine-tRNA ligase Yrs1 (predicted)	-0.208795	0.624476	0.797925	0.0702905	-0.659635	0.130382
SPAC6G9.02c	nop9	chromosome_1	pumilio family RNA-binding protein Nop9 (predicted)	0.907982	0.470989	0.803029	0.523268	1.84872	0.148986
SPAC1F5.03c		chromosome_1	FAD-dependent oxidoreductase involved in late endosome to Golgi transport (predicted)	-1.55816	0.0235049	0.803339	0.224133	-0.147939	0.820166
SPAC29A4.15	srs1	chromosome_1	cytoplasmic serine-tRNA ligase Srs1 (predicted)	-0.105386	0.807467	0.806775	0.0715237	-0.001335	0.997535
SPBC543.02c		chromosome_2	TPR domain protein, DNAJC7 family	0.281493	0.512743	0.812427	0.0672285	0.814046	0.0667223
SPBC32F12.06	pch1	chromosome_2	P-TEFB associated cyclin, cyclin T Pch1	-0.2933	0.789604	0.81789	0.459144	-0.628306	0.568655
SPBC1921.03c	mex67	chromosome_2	mRNA export receptor, Tap, nucleoporin Mex67	0.0409099	0.925519	0.818826	0.070884	0.516942	0.244319
SPAC6F12.06	rdi1	chromosome_1	Rho GDP dissociation inhibitor Rdi1 (predicted)	-1.63767	0.0295671	0.819082	0.258371	-0.591862	0.411057
SPBC13G1.04c	abh1	chromosome_2	tRNA demethylase (predicted)	-0.2933	0.403818	0.821326	0.0256944	0.0647622	0.852719
SPBC30B4.02c	sqs1	chromosome_2	R3H and G-patch domain protein Sqs1 (predicted)	-0.635761	0.317306	0.833244	0.193311	1.12532	0.0832793
SPAC521.03		chromosome_1	short chain dehydrogenase, human DHRS7 family(predicted)	0.0173325	0.967555	0.834599	0.0594938	0.127136	0.765643
SPBP4H10.06c	cut14	chromosome_2	condensin complex SMC subunit Smc2	1.64465	0.156471	0.840394	0.461928	-0.410991	0.717822
SPAC23H4.06	gln1	chromosome_1	glutamate-ammonia ligase Gln1	0.120925	0.772282	0.842917	0.0525921	0.402389	0.33986
SPBC1703.14c	top1	chromosome_2	DNA topoisomerase I	-0.0382788	0.939635	0.84409	0.104581	-0.108235	0.83052
SPAC4F10.11	spn1	chromosome_1	mitotic septin Spn1	-0.602254	0.213528	0.844372	0.0858786	-0.180461	0.705116
SPBC17G9.10	rpl1102	chromosome_2	60S ribosomal protein L11 (predicted)	1.02315	0.03525	0.852687	0.0751825	0.0182184	0.968615
SPBC83.16c		chromosome_2	protein with a role in clearing protein aggregates (predicted)	1.2228	0.179399	0.858624	0.341125	0.187595	0.833727
SPAC2C4.06c	rcm1	chromosome_1	tRNA (cytosine-5-)-methyltransferase Rcm1 (predicted)	1.64028	0.00457732	0.859608	0.114017	0.143147	0.787026
SPCC285.17	spp27	chromosome_3	RNA polymerase I upstream activation factor complex subunit Spp27	0.11837	0.815197	0.868643	0.0958364	0.405088	0.426664
SPBC21C3.13	rps1901	chromosome_2	40S ribosomal protein S19 (predicted)	0.513085	0.356305	0.869445	0.124137	-0.14642	0.790658
SPBC30D10.06	lsm4	chromosome_2	Lsm2-8 complex subunit Lsm4	0.235891	0.62806	0.870273	0.0828587	0.00084241	0.998616
SPAC8E11.02c	rad24	chromosome_1	14-3-3 protein Rad24	1.25226	0.0301261	0.872237	0.121357	-0.0800203	0.884062
SPBC56F2.04	utp20	chromosome_2	U3 snoRNP protein Utp20 (predicted)	-1.36806	0.099639	0.873003	0.285145	0.173979	0.82935
SPAC19A8.12	dcp2	chromosome_1	mRNA decapping complex catalytic subunit Dcp2	-2.34754	0.0320323	0.892574	0.395083	-0.451626	0.665164
SPBC3E7.10	fma1	chromosome_2	methionine aminopeptidase Fma1 (predicted)	0.398533	0.724545	0.895616	0.430869	-0.166907	0.882545
SPCC16C4.16c	cbc3	chromosome_3	nuclear cap-binding complex variant subunit Cbc3	0.923599	0.0387741	0.897432	0.0441265	-0.210931	0.621914
SPBC725.09c	hob3	chromosome_2	BAR adaptor protein Hob3	-1.06693	0.244623	0.904993	0.321738	-1.90476	0.0437489
SPBC1198.05		chromosome_2	guanylate kinase (predicted)	-1.01232	0.0714951	0.906099	0.104368	-0.127036	0.814869
SPCC613.07	bcd1	chromosome_3	snoRNA biogenesis protein Bcd1 (predicted)	0.442857	0.360124	0.908407	0.0677355	0.958649	0.0548103
SPBC1709.02c	vrs1	chromosome_2	cytoplasmic valine-tRNA ligase Vrs1/Vas1	-0.00580974	0.992507	0.923296	0.144668	-0.315211	0.611352
SPAC4D7.13	usp104	chromosome_1	U1 snRNP-associated protein Usp104	0.821452	0.225986	0.926595	0.17381	0.709256	0.293935
SPBC646.11	cct6	chromosome_2	chaperonin-containing T-complex zeta subunit Cct6	-0.560927	0.378956	0.926678	0.151722	-0.475359	0.454857
SPBC1685.02c	rps1202	chromosome_2	40S ribosomal protein S12 (predicted)	0.54088	0.437052	0.929287	0.187178	0.545254	0.433401
SPBC15D4.15	pho2	chromosome_2	4-phosphoerythronate phosphastase/2-phosphoglycolate phophatase, involved in detoxification of glycolytic by-products	0.612027	0.455686	0.93044	0.260416	0.642433	0.433886
SPBC1A4.07c	sof1	chromosome_2	U3 snoRNP-associated protein Sof1 (predicted)	0.238901	0.501301	0.931081	0.0137386	1.06004	0.0058262
SPBC530.05	prt1	chromosome_2	transcription factor (predicted)	-0.383708	0.588539	0.93287	0.195105	1.18262	0.104089
SPAC27F1.09c	prp10	chromosome_1	U2 snRNP-associated protein Sap155	0.79998	0.101229	0.937182	0.0573531	-0.023597	0.960306
SPCC736.07c	uri1	chromosome_3	unconventional prefoldin chaperone involved protein complex assembly Uri1 (predicted)	-0.51399	0.578679	0.949733	0.308645	-0.750029	0.41947
SPAC2F3.15	lsk1	chromosome_1	P-TEFb-associated cyclin-dependent protein kinase Lsk1	0.0238229	0.971343	0.950005	0.160776	0.859593	0.202752
SPBC660.15	msi2	chromosome_2	mRNA cleavage factor complex subunit Msi2	2.42978	0.000332711	0.951786	0.11396	0.68952	0.246233
SPAC20H4.01	utp5	chromosome_1	U3 snoRNP-associated protein Utp5 (predicted)	-0.572179	0.543745	0.964999	0.309306	1.60718	0.0965629
SPBC1D7.02c	scr1	chromosome_2	transcription factor Scr1	-0.2933	0.596641	0.969907	0.0889063	-0.226568	0.682306
SPBC29A3.06	utp18	chromosome_2	CGI-48 family Utp18 (predicted)	1.77604	0.0120072	0.984881	0.144616	1.17125	0.085569
SPBP4H10.18c		chromosome_2	Schizosaccharomyces specific protein	0.292353	0.666752	0.984899	0.154986	0.288004	0.671399
SPCC24B10.21	tpi1	chromosome_3	triosephosphate isomerase	-0.133915	0.7571	0.988087	0.0300006	-0.560459	0.20291
SPAC1834.06c	pmo25	chromosome_1	mo25 family protein Pmo25	0.261837	0.733317	0.988838	0.205428	0.428912	0.577555
SPAC19B12.09	srp14	chromosome_1	signal recognition particle subunit Srp14	-0.374154	0.542668	0.992943	0.114364	-0.221738	0.717562
SPAC22H10.12c	gdi1	chromosome_1	GDP dissociation inhibitor Gdi1 (predicted)	-0.11641	0.835762	0.998949	0.0848004	-0.817614	0.154108
SPBC14C8.14c	pol5	chromosome_2	polymerase phi, polymerase-related transcriptional regulator	-0.806799	0.494303	1.0016	0.397421	1.62229	0.175683
SPAC2F7.14c	rrp4	chromosome_1	exosome subunit Rrp4	-1.56809	0.15144	1.00333	0.352488	3.38861	0.00384941
SPAC8C9.05	dtd1	chromosome_1	D-Tyr-tRNA deacylase Dtd1 (predicted)	-0.507209	0.320644	1.02016	0.0526142	0.13419	0.790737
SPAC21E11.03c	pcr1	chromosome_1	transcription factor Pcr1	0.492481	0.607677	1.022	0.291121	0.504381	0.599079
SPBC12C2.07c	srm1	chromosome_2	spermidine synthase Srm1 (predicted)	0.0640533	0.85368	1.02431	0.00653491	0.922595	0.0130051
SPAC12G12.14c	pfs2	chromosome_1	mRNA cleavage and polyadenylation specificity factor complex, WD repeat protein Pfs2	1.26047	0.00800563	1.02655	0.026968	-0.191785	0.663541
SPBC2F12.03c	ebs1	chromosome_2	EST1 family nonsense-mediated mRNA decay (NMD) pathway protein Ebs1	-0.641551	0.297955	1.02774	0.1013	0.532693	0.385768
SPBC21B10.04c	nrf1	chromosome_2	vacuolar transporter chaperone (VTC) complex, GTPase regulator subunit Nrf1	-1.00255	0.165704	1.02796	0.15566	0.297959	0.674627
SPBC16A3.05c	rae1	chromosome_2	RNA export factor, nucleoporin Rae1	-0.80052	0.330503	1.02929	0.213827	0.272545	0.738157
SPCC16A11.13	luc7	chromosome_3	U1 snRNP-associated protein Luc7	0.23468	0.848549	1.03136	0.404648	0.599478	0.626418
SPAC2E12.02	hsf1	chromosome_1	transcription factor Hsf1	-0.379918	0.616232	1.03349	0.179983	0.0228745	0.975861
SPAC1834.02	aro1	chromosome_1	pentafunctional aromatic polypeptide Aro1 (predicted)	0.138419	0.838119	1.04122	0.133484	-0.143088	0.832743
SPAC23H3.15c	ddr48	chromosome_1	DNA damage-responsive protein ortholog DDr48	-1.88215	0.133875	1.05672	0.392255	1.28655	0.299392
SPCC962.03c	cut15	chromosome_3	importin alpha family nuclear import signal receptor adaptor Cut15	-0.603324	0.593413	1.06332	0.349784	0.210188	0.852051
SPAC664.06	rlp7	chromosome_1	ribosomal protein L7-like Rlp7 involved in ribosome biogenesis (predicted)	0.957277	0.267052	1.06335	0.219019	1.73863	0.0500876
SPBC530.14c	dsk1	chromosome_2	SR protein-specific kinase Dsk1	0.554914	0.555033	1.06595	0.261565	-0.813222	0.389058
SPAC6G9.14	puf4	chromosome_1	pumilio family RNA-binding protein Puf4 (predicted)	0.75993	0.458865	1.06703	0.30103	-0.361119	0.723642
SPAC26A3.12c	dhp1	chromosome_1	5'-3' exoribonuclease Dhp1	1.85123	0.00164631	1.07056	0.0512246	3.28545	1.72141e-06
SPBC4B4.05	smg1	chromosome_2	Sm snRNP core protein Smg1	-0.584001	0.55618	1.07062	0.284767	1.98283	0.0540589
SPAC1486.10	thi1	chromosome_1	transcription factor Thi1	-2.56891	0.000254669	1.07077	0.086158	0.829034	0.178572
SPCC364.03	rpl1702	chromosome_3	60S ribosomal protein L17 (predicted)	1.46829	0.0832694	1.07816	0.19689	-0.514127	0.532689
SPAC17A2.05	osm1	chromosome_1	fumarate reductase Osm1 (predicted)	-0.79256	0.036378	1.07975	0.00593897	0.756819	0.0448404
SPAC1F8.07c	pdc101	chromosome_1	pyruvate decarboxylase (predicted)	1.10711	0.00574832	1.08115	0.00680345	0.861176	0.0267734
SPBC15D4.10c	amo1	chromosome_2	nuclear rim protein Amo1	-2.30942	0.0502868	1.08811	0.340991	0.35561	0.753587
SPBC11B10.04c	mrps28	chromosome_2	mitochondrial ribosomal protein subunit S28 (predicted)	-0.2933	0.746731	1.09419	0.234851	-0.0348234	0.96938
SPBC3B8.05	dph1	chromosome_2	diphthamide biosynthesis protein Dph1 (predicted)	-1.08248	0.350259	1.09921	0.343002	-0.529427	0.645437
SPAC30D11.09	cwf19	chromosome_1	complexed with Cdc5 protein Cwf19	2.14202	0.000287206	1.102	0.0389768	1.29948	0.0166262
SPAC1071.09c		chromosome_1	nucleolar DNAJ domain protein, DNAJC9 family, implicated in mRNA splicing (predicted)	0.584135	0.555772	1.10281	0.27051	0.708512	0.47564
SPCC18.06c	caf1	chromosome_3	CCR4-Not complex CAF1 family ribonuclease subunit Caf1	-1.11467	0.276556	1.10986	0.278582	-0.242788	0.810413
SPAC4A8.12c	sds22	chromosome_1	protein phosphatase regulatory subunit Sds22	0.221638	0.575594	1.11061	0.009013	0.156818	0.691537
SPBC32F12.10		chromosome_2	phosphoglucomutase (predicted)	-1.16073	0.0219093	1.12657	0.0256625	-0.0175921	0.970654
SPAC22E12.13c	rlp24	chromosome_1	ribosomal L24-like protein involved in ribosome biogenesis Rlp24 (predicted)	-0.328258	0.717881	1.13158	0.219782	1.14447	0.214738
SPBP35G2.09	usp103	chromosome_2	U1 snRNP-associated protein Usp103	1.82014	0.130561	1.13624	0.3381	1.08817	0.358546
SPCC330.10	pcm1	chromosome_3	P-TEFb-cap methyltransferase Pcm1	-1.17667	0.269229	1.14455	0.282184	1.78718	0.0987702
SPBC354.01	gtp1	chromosome_2	cytoplasmic translation associated GTP binding protein Gtp1	-0.604612	0.605332	1.15095	0.328845	0.717635	0.540119
SPBC1105.01		chromosome_2	rRNA processing protein Rrp12-like (predicted)	1.2654	0.281441	1.151	0.3262	2.90697	0.0183887
SPCC622.15c		chromosome_3	Schizosaccharomyces specific protein	0.95753	0.291249	1.15458	0.205562	0.598067	0.506697
SPCPB16A4.05c	ure7	chromosome_3	urease accessory protein UreG	2.00596	0.00142654	1.15801	0.0481894	0.513255	0.365139
SPBC1709.08	cft1	chromosome_2	mRNA cleavage and polyadenylation specificity factor complex, WD repeat protein Cft1	1.77676	0.087094	1.15812	0.256258	-0.487716	0.628692
SPAC4A8.15c	cdc3	chromosome_1	profilin	0.223643	0.776477	1.15883	0.149931	0.0805249	0.918517
SPBC4C3.07	eif6	chromosome_2	translation initiation factor eIF3f	0.955188	0.153574	1.15965	0.0862665	-0.870201	0.191968
SPAC26H5.09c		chromosome_1	oxidoreductase involved in NADPH regeneration (predicted)	0.199762	0.546447	1.1626	0.00160488	0.882096	0.0125286
SPAC1F3.05	gga21	chromosome_1	Golgi localized Arf binding gamma-adaptin ortholog Gga21	1.36249	0.257637	1.17748	0.326271	0.354668	0.765337
SPCC4G3.04c	coq5	chromosome_3	C-methyltransferase (predicted)	0.543307	0.176718	1.17996	0.00590968	0.240579	0.543396
SPCP31B10.06	tcb2	chromosome_3	tricalbin, C2 domain protein (phospholipid binding) ER-plasma membrane tethering protein Tcb2 (predicted)	-0.41761	0.521123	1.18396	0.0773434	0.0618223	0.924001
SPCC576.03c	tpx1	chromosome_3	thioredoxin peroxidase Tpx1	1.35349	0.270087	1.19519	0.328746	-0.0481789	0.968273
SPCC126.03	pus1	chromosome_3	TruA family tRNA/ U2 snRNA pseudouridine synthase Lsp1	-0.0403909	0.972542	1.20127	0.311306	-0.91185	0.440048
SPBC17G9.08c	cnt5	chromosome_2	Centaurin Cnt5	-0.410976	0.471749	1.20322	0.0427565	-0.944728	0.105865
SPAC31G5.14	gcv1	chromosome_1	glycine decarboxylase T subunit (predicted)	0.167494	0.674075	1.21386	0.00509861	0.423186	0.292805
SPAC227.08c	yth1	chromosome_1	mRNA cleavage and polyadenylation specificity factor complex Yth1	0.808555	0.157092	1.22213	0.0371237	-0.196253	0.72598
SPCC18.14c	rpp0	chromosome_3	60S acidic ribosomal protein Rpp0 (predicted)	0.227267	0.6841	1.22576	0.0361113	0.350648	0.531161
SPAC6G10.07	cbc1	chromosome_1	nuclear cap-binding complex large subunit (predicted)	1.3319	0.00453082	1.22709	0.00813145	0.947281	0.0354832
SPAC56E4.04c	cut6	chromosome_1	acetyl-CoA/biotin carboxylase	1.2842	0.0139027	1.22738	0.0181187	-0.462702	0.348204
SPBC9B6.05c	lsm3	chromosome_2	Lsm2-8 complex subunit Lsm3	-0.820919	0.469703	1.2291	0.282343	-0.000108026	0.999924
SPAC3F10.15c	spo12	chromosome_1	Spo12 family nuclear protein	2.55136	0.0157805	1.23035	0.222095	0.089302	0.928247
SPAC23C4.12	hhp2	chromosome_1	serine/threonine protein kinase Hhp2	0.860313	0.273159	1.23397	0.120827	-0.341967	0.659697
SPAC5H10.03		chromosome_1	phosphoglycerate mutase/6-phosphofructo-2-kinase family	-1.41376	0.133751	1.23908	0.186367	0.632248	0.494204
SPAC1F3.09	mug161	chromosome_1	CwfJ family protein, splicing factor (predicted)	3.01684	0.00113827	1.24056	0.141411	0.904776	0.278332
SPCC1672.02c	sap1	chromosome_3	switch-activating protein Sap1	0.173453	0.759979	1.24798	0.0359621	-0.0390039	0.945177
SPAC664.11	ssc1	chromosome_1	mitochondrial (2Fe-2S) cluster assembly chaperone Ssc1	-0.935541	0.0587014	1.25802	0.0134527	0.744466	0.127254
SPCC1223.07c	drs1	chromosome_3	cytoplasmic aspartate-tRNA ligase Drs1 (predicted)	-0.0357944	0.921376	1.27042	0.00168804	-0.383067	0.296455
SPBC1773.17c	gor2	chromosome_2	glyoxylate reductase (predicted)	-0.2933	0.494704	1.27957	0.00588637	0.791006	0.0738148
SPAC23C11.03	mpp10	chromosome_1	U3 snoRNP-associated protein Mpp10 (predicted)	-1.15609	0.28215	1.28327	0.233868	2.25548	0.0422285
SPAC4G8.13c	prz1	chromosome_1	calcineurin responsive transcription factor Prz1	-0.282582	0.730364	1.28578	0.125806	-0.674076	0.413774
SPAC17G6.12	cul1	chromosome_1	cullin 1	0.536895	0.259004	1.28898	0.010554	0.113678	0.808669
SPBC1703.05	rio2	chromosome_2	protein kinase, RIO family Rio2 (predicted)	0.987641	0.169075	1.29145	0.0761082	-1.12095	0.120657
SPBC4F6.07c	mak5	chromosome_2	ATP-dependent RNA helicase Mak5 (predicted)	0.262485	0.738084	1.2951	0.108193	1.95232	0.019036
SPCC736.15	pil1	chromosome_3	eisosome BAR domain protein Pil1	-0.640986	0.332667	1.29899	0.0565999	-0.0843382	0.897567
SPBC8D2.06	irs1	chromosome_2	cytoplasmic isoleucine-tRNA ligase Irs1 (predicted)	0.30963	0.650821	1.29919	0.0665	-0.590334	0.390872
SPCC14G10.04		chromosome_3	Schizosaccharomyces specific protein	2.34639	0.00321766	1.31501	0.0788246	-0.553903	0.44679
SPCC962.06c	bpb1	chromosome_3	KH and CC/hC domain splicing factor Bpb1	0.2065	0.798073	1.31681	0.112148	-0.836685	0.305057
SPBC24C6.04	put2	chromosome_2	delta-1-pyrroline-5-carboxylate dehydrogenase Put2 (predicted)	-1.52263	0.0561908	1.33404	0.0914591	0.983195	0.20729
SPAC17G6.14c	uap56	chromosome_1	TREX complex subunit, ATP-dependent RNA helicase Uap56	0.0221893	0.964879	1.3363	0.0131739	-0.000878371	0.998609
SPCC285.12	lsm7	chromosome_3	Lsm2-8 complex Lsm7 (predicted)	1.09424	0.136541	1.33935	0.0715649	1.25541	0.0899169
SPCC10H11.01	prp11	chromosome_3	ATP-dependent RNA helicase Prp11	1.21793	0.0323025	1.35704	0.0183132	0.750427	0.174104
SPCC663.08c		chromosome_3	short chain dehydrogenase, unknown specificity (predicted)	-3.4574	0.000966072	1.35897	0.152035	1.76398	0.0668194
SPBC3B9.08c	mnh1	chromosome_2	exon junction complex subunit, Mago-nashi homolog Mnh1	0.427634	0.675233	1.35938	0.190234	-0.0289184	0.977354
SPAC24H6.04	hxk1	chromosome_1	hexokinase 1	2.75144	0.00231988	1.3644	0.103818	0.149987	0.854058
SPBP8B7.31		chromosome_2	HAD superfamily hydrolase, unknown role	-0.2933	0.776236	1.36988	0.192071	-0.187203	0.855971
SPAC12G12.06c	rcl1	chromosome_1	rRNA processing protein Rcl1 (predicted)	-0.2933	0.48123	1.37133	0.00272322	-0.237709	0.56741
SPAC222.06	mak16	chromosome_1	nuclear HMG-like acidic protein Mak16 (predicted)	2.24316	0.0114528	1.37514	0.106019	-0.0416719	0.959815
SPCC74.05	rpl2702	chromosome_3	60S ribosomal protein L27 (predicted)	-0.0883899	0.905113	1.38596	0.0711477	-0.3194	0.667222
SPAC4F8.07c	hxk2	chromosome_1	hexokinase 2	0.726584	0.173554	1.39853	0.0125637	-1.37957	0.0136577
SPAC23C4.17	trm402	chromosome_1	tRNA (cytosine-5-)-methyltransferase (predicted)	0.793231	0.223757	1.43353	0.0334549	1.19091	0.0730773
SPBC2F12.02c	mrpl7	chromosome_2	mitochondrial ribosomal protein subunit L7 (predicted)	-0.2933	0.713462	1.43749	0.0811814	-0.469956	0.557165
SPBC543.06c	dbp8	chromosome_2	ATP-dependent RNA helicase Dbp8 (predicted)	0.4736	0.557665	1.43867	0.0835333	-0.148781	0.853383
SPAC821.05	tif38	chromosome_1	translation initiation factor eIF3h (p40)	-0.590787	0.122697	1.44015	0.000686587	-0.0452068	0.903551
SPAC30D11.12	rpl3802	chromosome_1	60S ribosomal protein L38 (predicted)	-1.28149	0.196394	1.44517	0.147044	-0.877065	0.372088
SPCC70.06	sac32	chromosome_3	nuclear export factor Sac32 (predicted)	-0.00493793	0.995378	1.4551	0.0975256	-0.0459607	0.957003
SPBC1773.03c		chromosome_2	aminotransferase class-III, possible transaminase, unknown specificity	0.683267	0.433987	1.46928	0.100043	-0.0780938	0.928283
SPBC1604.09c	rex4	chromosome_2	exoribonuclease Rex4 (predicted)	-0.157347	0.745281	1.47657	0.00511842	0.562148	0.251943
SPAC4G8.03c	puf5	chromosome_1	pumilio family RNA-binding protein Puf5 (predicted)	0.0129701	0.986698	1.48312	0.066086	-0.372159	0.633203
SPAC9G1.03c	rpl3001	chromosome_1	60S ribosomal protein L30 (predicted)	0.118632	0.865321	1.48381	0.0424543	-0.348323	0.619315
SPBC26H8.10	dis3	chromosome_2	exosome 3'-5' exoribonuclease subunit Dis3	0.122786	0.911156	1.49473	0.182628	5.35279	5.29788e-05
SPBC1685.15c	klp6	chromosome_2	kinesin-8 family plus-end directed microtubule motor Klp6	-0.2933	0.40481	1.49916	0.000230211	0.0647622	0.85303
SPAC17A5.10	hua1	chromosome_1	conserved fungal protein, possibly DNA J domain Hua1	0.133394	0.850281	1.50937	0.0411646	-0.364627	0.606763
SPAC144.09c	sfc2	chromosome_1	transcription factor TFIIIA	-0.2933	0.430687	1.51343	0.000380226	0.0647622	0.860996
SPAC31G5.10	eta2	chromosome_1	Myb family protein, RNA polymerase I termination factor Eta2 (predicted)	-0.2933	0.553504	1.52187	0.00471485	2.73172	9.61838e-06
SPBC21C3.05	sap62	chromosome_2	U2 snRNP Sap62	1.29958	0.0171195	1.52293	0.00618762	0.199472	0.697431
SPAC19G12.06c	hta2	chromosome_1	histone H2A beta	1.64321	0.0014633	1.5239	0.00278142	0.626034	0.183237
SPBC649.05	cut12	chromosome_2	spindle pole body protein Cut12	1.78561	0.0285231	1.53857	0.0560011	0.322181	0.677702
SPBC13A2.01c	cbc2	chromosome_2	nuclear cap-binding complex small subunit (predicted)	1.76818	0.0122561	1.55173	0.0257357	0.705493	0.290195
SPAC27D7.07c	smd1	chromosome_1	Sm snRNP core protein Smd1	0.973195	0.22076	1.55273	0.0563262	0.221937	0.77675
SPAC140.02	gar2	chromosome_1	nucleolar protein required for rRNA processing	1.75546	0.000260219	1.57083	0.000809508	1.0445	0.0176354
SPBC83.15	wdr74	chromosome_2	ribosome assembly factor, WD repeat protein Nsa1/Wdr74 (predicted)	0.341037	0.679358	1.57483	0.0653319	1.4195	0.0944895
SPAC3H8.10	spo20	chromosome_1	sec14 cytosolic factor family, phospholipid-intermembrane transfer protein Spo20/Sec14	-0.739182	0.348587	1.57595	0.0527705	-0.724691	0.357944
SPAC222.09	seb1	chromosome_1	RNA-binding and 3'-end processing protein Seb1	2.97773	1.44465e-05	1.58843	0.0079378	1.10656	0.0548733
SPBC1734.01c	esf1	chromosome_2	pre-rRNA processing protein Esf1 (predicted)	-0.721206	0.465296	1.59222	0.114536	6.1671	1.5469e-06
SPBC30D10.17c	smi1	chromosome_2	cell wall biosynthesis/ cell cycle regulator (predicted)	-0.71865	0.325923	1.59887	0.0353458	-0.724885	0.321829
SPBC725.08	pir2	chromosome_2	NURS complex subunit, zf-C2H2 type zinc finger protein	2.09168	0.00733605	1.6026	0.0342349	1.45558	0.052561
SPAC1142.04	noc201	chromosome_1	Noc complex subunit Noc201 (predicted)	0.67661	0.501981	1.60314	0.119452	1.41889	0.165833
SPAC12B10.03	bun62	chromosome_1	WD repeat protein Wdr20	0.450192	0.497005	1.6049	0.0216165	0.445382	0.50157
SPBC13G1.02	mpg2	chromosome_2	mannose-1-phosphate guanyltransferase (predicted)	-0.35884	0.541064	1.6153	0.0101905	0.265328	0.65073
SPCC1322.14c	vtc4	chromosome_3	vacuolar transporter chaperone (VTC) complex subunit (predicted)	-1.74112	0.11358	1.61773	0.1401	0.606766	0.572325
SPBC11G11.03	mrt4	chromosome_2	mRNA turnover and ribosome assembly protein Mrt4 (predicted)	1.3316	0.0327403	1.62422	0.0108081	1.13845	0.0645051
SPAC6F12.17	rna14	chromosome_1	mRNA cleavage and polyadenylation specificity factor complex subunit Rna14	1.86468	0.02463	1.6494	0.0444251	0.81653	0.303937
SPAC688.13	scn3	chromosome_1	TatD DNase family Scn1	0.177817	0.791959	1.65706	0.0203735	2.33449	0.00185563
SPAC12G12.10	wdr21	chromosome_1	WD repeat protein, human DDB1 and CUL4-associated factor 4 ortholog Wdr21	-0.34779	0.717627	1.66783	0.0921642	0.848864	0.380697
SPAC1006.03c	red1	chromosome_1	RNA elimination defective protein Red1	0.187338	0.887852	1.66882	0.216471	2.09049	0.124929
SPBC106.06	cct4	chromosome_2	chaperonin-containing T-complex delta subunit Cct4	1.16575	0.0591476	1.66983	0.00912035	-0.265721	0.655486
SPBC646.09c	int6	chromosome_2	eIF3e subunit Int6	0.158078	0.820668	1.67141	0.0233768	0.0946988	0.891942
SPCC1322.04	fyu1	chromosome_3	UTP-glucose-1-phosphate uridylyltransferase Fyu1	3.14878	0.0277165	1.6989	0.218011	0.681315	0.616507
SPAC4G8.07c	trm2	chromosome_1	tRNA (m5U54) methyltransferase Trm2 (predicted)	1.33299	0.213221	1.70141	0.115742	1.71034	0.113941
SPAC22G7.10	iss1	chromosome_1	mRNA cleavage and polyadenylation specificity factor complex subunit, Fip1 homolog (predicted)	3.67379	6.86124e-07	1.70938	0.00479858	2.09921	0.000840695
SPAC4F8.02c	mrpl40	chromosome_1	mitochondrial ribosomal protein subunit L40 (predicted)	3.57296	0.00113795	1.72211	0.0873653	-1.26114	0.20413
SPAC23A1.17	bbc1	chromosome_1	WIP family cytoskeletal protein Bbc1 (predicted)	-1.24764	0.142118	1.7317	0.0458296	1.34932	0.113741
SPAC27D7.03c	mei2	chromosome_1	RNA-binding protein involved in meiosis Mei2	-0.708216	0.220821	1.7403	0.00505048	0.759559	0.190189
SPAC26A3.06	bud23	chromosome_1	rRNA (guanine-N7-)-methyltransferase Bud23 (predicted)	0.463398	0.411402	1.7449	0.00438952	-0.363084	0.518666
SPAC644.16	rna15	chromosome_1	RNA-binding protein Rna15	2.91529	0.000133031	1.75711	0.0113817	0.342692	0.597555
SPBC1198.13c	tfg2	chromosome_2	transcription factor TFIIF complex beta subunit Tfg2 (predicted)	-0.965024	0.190468	1.76443	0.0213749	-0.70841	0.332466
SPBC1271.12	kes1	chromosome_2	sterol intermembrane transfer protein Kes1 (predicted)	0.388411	0.678011	1.77327	0.067083	0.214479	0.818438
SPCC1682.05c	srp68	chromosome_3	signal recognition particle subunit (predicted)	-1.34375	0.136645	1.78039	0.0525046	0.776648	0.382174
SPBC947.02	apl2	chromosome_2	AP-1 adaptor complex subunit beta subunit Apl2	1.09998	0.0564891	1.78073	0.00346965	-0.487882	0.382744
SPAC16E8.10c	rsm7	chromosome_1	mitochondrial ribosomal protein subunit S7, Rsm7(predicted)	3.61385	0.121237	1.78443	0.43529	2.58454	0.261829
SPAC3H5.10	rpl3202	chromosome_1	60S ribosomal protein L32 (predicted)	1.99016	0.0902574	1.78542	0.126354	-0.0819682	0.942624
SPAC1565.08	cdc48	chromosome_1	AAA family ATPase involved in ubiquitin-mediated protein degradation Cdc48	0.308878	0.636928	1.78691	0.0108091	0.99071	0.138358
SPCC794.11c	ent3	chromosome_3	ENTH/VHS domain protein Ent3 (predicted)	0.22857	0.810049	1.7919	0.0689094	-0.24051	0.800344
SPBC776.02c	dis2	chromosome_2	serine/threonine protein phosphatase PP1, Dis2	-0.935167	0.404572	1.80072	0.115447	0.0848941	0.939239
SPAC23C11.11	cka1	chromosome_1	serine/threonine protein kinase Cka1	-0.458114	0.503832	1.80244	0.0134496	-1.29511	0.0670947
SPBC29A3.09c	gcn20	chromosome_2	AAA family ATPase Gcn20 (predicted)	0.441508	0.651863	1.80775	0.0737365	-1.37887	0.166586
SPBC28E12.04		chromosome_2	Schizosaccharomyces specific protein	-0.2933	0.402262	1.81031	2.21094e-05	0.0647622	0.852229
SPCC737.07c		chromosome_3	DNA polymerase alpha-associated DNA helicase A (predicted)	0.830993	0.344631	1.8146	0.0460112	-2.35816	0.0115738
SPAC10F6.10	rio1	chromosome_1	protein kinase, RIO family Rio1 (predicted)	0.601075	0.396036	1.81988	0.0151904	0.0621073	0.929582
SPAC30.03c	tsn1	chromosome_1	translin	-0.2933	0.662088	1.83686	0.0106713	1.32361	0.0573981
SPCP1E11.06	apl4	chromosome_3	AP-1 adaptor complex gamma subunit Apl4	-0.104163	0.939549	1.84808	0.186664	0.591211	0.667476
SPAC110.04c	pss1	chromosome_1	heat shock protein Pss1	-0.641269	0.639131	1.85469	0.182349	-0.304346	0.823572
SPBC29B5.01	atf1	chromosome_2	transcription factor, Atf-CREB family Atf1	1.06406	0.132258	1.86576	0.0116523	-0.892054	0.203768
SPBC646.10c	nop56	chromosome_2	U3 snoRNP protein Nop56 (predicted)	0.554567	0.314333	1.86597	0.0020645	1.22319	0.032772
SPAC644.17c	mrpl9	chromosome_1	mitochondrial ribosomal protein subunit L9 (predicted)	-0.2933	0.716744	1.87171	0.0278498	-0.843322	0.301725
SPBC13G1.10c	slh1	chromosome_2	ATP-dependent RNA helicase Slh1, human ASCC3 ortholog (predicted)	0.475109	0.59646	1.89096	0.0431955	0.187343	0.834198
SPBC1306.02	rtt10	chromosome_2	WD repeat protein, human WDR6 family, involved in endocytic recycling	-0.2933	0.418101	1.91799	1.61811e-05	0.0647622	0.857158
SPAC1B3.16c	vht1	chromosome_1	plasma membrane vitamin H transmembrane transporter Vht1	-2.07167	0.027857	1.92508	0.0396496	2.17	0.0218513
SPAC18G6.15	mal3	chromosome_1	microtubule plus-end binding protein, EB1 family Mal3	1.16958	0.192053	1.9262	0.0368968	0.527374	0.550613
SPAC23G3.06	nop58	chromosome_1	U3 snoRNP protein Nop58 (predicted)	1.32586	0.0335873	1.93133	0.00314969	0.515095	0.38961
SPAPB24D3.04c	mag1	chromosome_1	DNA-3-methyladenine glycosylase Mag1	-0.290832	0.793962	1.95015	0.0893981	0.320951	0.773217
SPBC1604.12		chromosome_2	Schizosaccharomyces specific phosphoprotein	0.651673	0.434094	1.95459	0.025343	-0.667854	0.42292
SPAC25B8.15c	tyw3	chromosome_1	wybutosine biosynthesis protein Tyw3 (predicted)	-0.2933	0.392342	1.96731	5.2414e-06	0.0647622	0.849082
SPAC13G6.06c	gcv2	chromosome_1	glycine cleavage complex subunit P (predicted)	1.54263	0.065267	1.97989	0.0206035	0.59256	0.465079
SPBC21C3.07c	trm140	chromosome_2	tRNA (cytosine) methyltransferase Trm140 (predicted)	1.02913	0.187435	1.98948	0.0149533	-0.464829	0.54565
SPCC24B10.15	swt1	chromosome_3	RNA endoribonuclease involved in mRNP quality control Swt1 (predicted)	1.96263	0.000949826	2.01176	0.000750052	0.466915	0.378526
SPAC18B11.06	lcp5	chromosome_1	U3 snoRNP-associated protein Lcp5 (predicted)	2.018	0.192757	2.03261	0.189669	2.7924	0.0760658
SPCC1919.03c	amk2	chromosome_3	AMP-activated protein kinase beta subunit Amk2	-0.228621	0.831744	2.03651	0.06782	-0.258679	0.810045
SPBP16F5.08c	fmo1	chromosome_2	ER flavin-containing N,N-dimethylaniline monooxygenase activity Fmo1 (predicted)	0.624351	0.265113	2.03866	0.00106342	1.51531	0.0107105
SPBC3B9.11c	ctf1	chromosome_2	mRNA cleavage and polyadenylation specificity factor complex subunit Ctf1	-0.2933	0.518514	2.0492	0.000124275	0.378721	0.405852
SPBC1703.07	acl1	chromosome_2	ATP citrate synthase subunit 1 (predicted)	-0.779626	0.150354	2.0596	0.000645118	-0.290811	0.58447
SPBC16G5.16		chromosome_2	transcription factor, zf-fungal binuclear cluster type (predicted)	-0.2933	0.764216	2.06442	0.0432427	0.891413	0.365728
SPBP4H10.15	aco2	chromosome_2	aconitate hydratase/mitochondrial ribosomal protein subunit L21, fusion protein	0.161562	0.890653	2.07948	0.0864624	1.57832	0.187387
SPBC18E5.11c	edc3	chromosome_2	enhancer of mRNA decapping Edc3	-1.12214	0.486617	2.08849	0.200964	0.0121852	0.993941
SPAC3F10.17	ltv1	chromosome_1	ribosome biogenesis protein Ltv1 (predicted)	-0.577038	0.464945	2.10554	0.0122942	0.282565	0.719307
SPAC23G3.08c	ubp7	chromosome_1	ubiquitin C-terminal hydrolase Ubp7	-1.84075	0.0833061	2.11194	0.0490711	-0.331396	0.747657
SPCC1682.08c	mpf2	chromosome_3	meiotic pumilio family RNA-binding protein Mpf2	-0.2933	0.476997	2.12065	2.44126e-05	0.0647622	0.874585
SPAC19D5.06c	din1	chromosome_1	RNA pyrophosphohydrolase Din1	1.07721	0.114908	2.1337	0.0035058	1.8	0.0116168
SPBC21D10.12	hob1	chromosome_2	BAR adaptor protein Hob1	0.162554	0.817181	2.14638	0.00509263	-0.398786	0.571731
SPAC1687.15	gsk3	chromosome_1	serine/threonine protein kinase Gsk3	-1.39549	0.105712	2.1501	0.0160984	-0.816519	0.335002
SPBC17D1.03c	rrp43	chromosome_2	exosome subunit Rrp43	-0.269064	0.774458	2.154	0.0292568	1.3325	0.164234
SPBP8B7.15c	mpe1	chromosome_2	mRNA cleavage ubiquitin-protein ligase E3 Mpe1 (predicted)	3.46378	0.000140703	2.18605	0.00871496	1.42868	0.0740979
SPBP22H7.02c	mrd1	chromosome_2	ribosome biogenesis RNA-binding protein Mrd1 (predicted)	1.69941	0.0123843	2.21834	0.00171788	2.43772	0.000719917
SPAC2C4.15c	ubx2	chromosome_1	UBX domain protein Ubx2	-0.519321	0.74367	2.21955	0.170356	-1.17549	0.461301
SPBC17D1.06	dbp3	chromosome_2	ATP-dependent RNA helicase Dbp3 (predicted)	1.89721	0.047911	2.23099	0.0219104	-0.0616355	0.946537
SPCC320.10	srp72	chromosome_3	signal recognition particle subunit Srp72 (predicted)	-0.622442	0.483408	2.25759	0.0164253	-0.171243	0.84637
SPBC1709.18	tif452	chromosome_2	translation initiation factor eIF4E, 4F complex E subunit isoform 2, stress response factor	2.00512	0.157917	2.29215	0.108693	-1.40086	0.318617
SPAC1805.12c	uep1	chromosome_1	ribosomal-ubiquitin fusion protein Ubi2	-0.2933	0.785558	2.30075	0.0412218	0.241427	0.822742
SPBC19G7.16	iws1	chromosome_2	transcription elongation factor complex subunit Iws1 (predicted)	-0.499401	0.40729	2.30794	0.000691683	0.57016	0.345169
SPAC4G9.04c	pcf11	chromosome_1	mRNA cleavage and polyadenylation specificity factor (predicted)	1.26378	0.141986	2.32741	0.0100552	0.329482	0.695632
SPAC11D3.15		chromosome_1	5-oxoprolinase (ATP-hydrolizing) (predicted)	0.252779	0.681061	2.33756	0.000785587	-0.0722472	0.90633
SPCC126.11c		chromosome_3	RNA-binding protein, rrm type	1.35113	0.00840196	2.34783	4.34452e-05	0.255859	0.591274
SPBC146.03c	cut3	chromosome_2	condensin complex SMC subunit Smc4	-0.2933	0.565493	2.35904	9.43671e-05	0.701002	0.176526
SPAC17G6.17	pof8	chromosome_1	LARP7 family RNA-binding protein Pof8/Lar7	2.00639	0.010438	2.36313	0.00322868	0.970842	0.191097
SPAC1687.19c	qtr1	chromosome_1	queuine tRNA-ribosyltransferase Qtrt1	-0.0981798	0.906702	2.3782	0.00850559	0.636416	0.450145
SPBC11G11.06c	sme1	chromosome_2	Sm snRNP core protein Sme1	0.914288	0.57233	2.3955	0.146772	2.86359	0.0856909
SPAC11D3.14c		chromosome_1	5-oxoprolinase (ATP-hydrolizing) (predicted)	1.85087	0.00164394	2.40021	0.000116299	-0.174639	0.740509
SPAC2C4.08		chromosome_1	conserved fungal protein	-0.2933	0.444902	2.40874	1.42468e-06	0.0647622	0.865253
SPAC13G6.14	aps1	chromosome_1	diadenosine 5',5'''-p1,p6-hexaphosphate hydrolase Aps1	-0.16351	0.877017	2.43612	0.0286114	0.785708	0.45963
SPBC27B12.12c		chromosome_2	CorA family magnesium ion transmembrane transporter (predicted)	4.03271	6.91387e-05	2.4759	0.00697867	-1.00779	0.241117
SPBC1861.04c	prp24	chromosome_2	RNA-binding protein Prp24	3.85727	0.0126107	2.47798	0.0959231	2.03442	0.167611
SPAC1071.07c	rps1502	chromosome_1	40S ribosomal protein S15 (predicted)	-0.996295	0.575916	2.49009	0.169313	-0.773829	0.663536
SPBC3B8.09	utp3	chromosome_2	U3 snoRNP-associated protein Utp3 (predicted)	0.221201	0.863196	2.50034	0.0607529	1.15276	0.373138
SPAC3G6.04	rnp24	chromosome_1	RNA-binding protein Rnp24	0.960133	0.317855	2.52678	0.0130119	-0.816321	0.394347
SPAC16E8.16	sua7	chromosome_1	transcription factor TFIIB	1.09717	0.241965	2.54418	0.0104015	3.67382	0.000512364
SPBC8E4.01c	pho84	chromosome_2	inorganic phosphate transmembrane transporter (predicted)	-1.28897	0.414891	2.57402	0.110649	0.331481	0.832828
SPAC18G6.05c	gcn1	chromosome_1	translation initiation regulator Gcn1	2.28695	0.0259139	2.60131	0.0124948	-0.353034	0.716993
SPBC2D10.11c	nap2	chromosome_2	histone H2A-H2B chaperone Nap2	-0.889824	0.180274	2.61526	0.00046404	-0.370572	0.570732
SPAC2E1P5.05	rrp9	chromosome_1	U3 snoRNP-associated protein Rrp9 (predicted)	2.55726	0.00499624	2.64178	0.00390834	2.87976	0.00193692
SPAC29B12.08	clr5	chromosome_1	Clr5 protein	-0.0269412	0.975804	2.67862	0.00558898	1.3922	0.126453
SPCC1840.10	lsm8	chromosome_3	Lsm2-8 complex Lsm8 (predicted)	1.08428	0.331279	2.67986	0.0219873	2.07794	0.0695463
SPAC2F7.05c	tif5	chromosome_1	translation initiation factor eIF5, Tif5(predicted)	0.11971	0.926725	2.71131	0.0460552	0.538002	0.679899
SPBP16F5.07	apm1	chromosome_2	AP-1 adaptor complex mu subunit Apm1	0.641151	0.65867	2.73518	0.0685044	1.30956	0.370045
SPAC6G10.04c	pre5	chromosome_1	20S proteasome complex subunit alpha 6 Pre5	2.22291	0.0189323	2.75916	0.0046269	0.416126	0.64156
SPBC13A2.03		chromosome_2	ER phosphatidate cytidylyltransferase	-1.08852	0.11287	2.81614	0.000278938	0.0647622	0.922792
SPAC2C4.11c	pno1	chromosome_1	KH domain RNA-binding protein Pno1 (predicted)	1.7882	0.0543524	2.83284	0.00381598	0.207443	0.816362
SPCC736.12c	mmi1	chromosome_3	nucleus specific RNA binding exosome specificity factor Mmi1	1.30645	0.38114	2.87567	0.0613172	0.855579	0.56445
SPBC1711.05	srp40	chromosome_2	nucleocytoplasmic transport chaperone Srp40 (predicted)	1.61092	0.013783	2.92776	6.51791e-05	0.717805	0.247657
SPAC2F3.03c	rpa49	chromosome_1	DNA-directed RNA polymerase I complex subunit Rpa49 (predicted)	-0.104375	0.892688	2.93883	0.000802816	1.82911	0.0251768
SPBC4B4.07c	usp102	chromosome_2	U1 snRNP-associated protein Usp102	0.979297	0.334955	2.9518	0.00677099	0.417358	0.678666
SPAC23C11.05	ipp1	chromosome_1	inorganic pyrophosphatase Ipp1 (predicted)	-1.63664	0.0707795	2.97409	0.0021735	-0.531361	0.544912
SPBC25B2.05	mis3	chromosome_2	rRNA processing protein Mis3	1.28745	0.174305	2.99822	0.00334216	0.718019	0.442483
SPAC29A4.04c	cbf5	chromosome_1	pseudouridine synthase Cbf5 (predicted)	6.26401	2.76304e-07	3.07703	0.00198027	0.594768	0.508173
SPBC18E5.06	rps21	chromosome_2	40S ribosomal protein S21	0.0405304	0.974848	3.14568	0.0209669	1.81522	0.166607
SPAC17A5.02c	dbr1	chromosome_1	RNA lariat debranching enzyme Dbr1	1.5721	0.15351	3.15704	0.00686109	2.93047	0.011258
SPCC1235.05c	fft2	chromosome_3	SMARCAD1 family ATP-dependent DNA helicase Fft2 (predicted)	1.35649	0.066727	3.17443	0.000152836	1.14459	0.118112
SPAC1782.10c	nhp2	chromosome_1	box H/ACA snoRNP complex subunit Nhp2	5.30327	1.41102e-05	3.20048	0.00315457	-0.37361	0.704752
SPBC1709.15c	cft2	chromosome_2	cleavage factor two Cft2/polyadenylation factor CPSF-73 (predicted)	0.701326	0.533087	3.22183	0.007811	1.76722	0.124204
SPBP8B7.25	cyp4	chromosome_2	cyclophilin family peptidyl-prolyl cis-trans isomerase Cyp4	1.99828	0.0844292	3.26692	0.0071335	0.942839	0.40395
SPAC8E11.10		chromosome_1	sorbose reductase (predicted)	0.996354	0.198226	3.28867	0.000211419	3.57215	8.15449e-05
SPBC4C3.05c	nuc1	chromosome_2	DNA-directed RNA polymerase I complex large subunit Nuc1	3.12158	0.0145269	3.3284	0.00973163	1.80726	0.140085
SPBC12D12.04c	pck2	chromosome_2	protein kinase C (PKC)-like Pck2	-0.296571	0.78603	3.35455	0.00486561	1.33732	0.227803
SPAC926.08c	rpf2	chromosome_1	Brix domain ribosome biogenesis protein Rpf2	1.54036	0.0722361	3.42379	0.000339189	0.159197	0.847477
SPBC651.08c	rpc1	chromosome_2	DNA-directed RNA polymerase III complex large subunit Rpc1 (predicted)	-0.42015	0.727737	3.44126	0.00819347	1.48089	0.226492
SPBC119.11c	pac1	chromosome_2	double-strand-specific ribonuclease Pac1	1.80347	0.00317734	3.59646	9.59358e-07	2.36645	0.000247332
SPBC428.07	meu6	chromosome_2	pleckstrin homology domain protein, implicted in meiotic chromosome segregation protein Meu6	6.6959	7.07866e-09	3.6368	8.15902e-05	1.01987	0.195913
SPAC5H10.01	dgc1	chromosome_1	mitochondrial D-glutamate cyclase Dgc1 (predicted)	1.38606	0.223815	3.93709	0.00165706	-0.645117	0.566473
SPAC2E1P3.04	cao1	chromosome_1	copper amine oxidase Cao1	-1.45052	0.0361419	3.93989	3.29796e-06	1.82626	0.0100733
SPCC1620.01c	lsm2	chromosome_3	Lsm2-8 complex subunit Lsm2	1.82677	0.232197	3.98239	0.0133835	0.27303	0.856156
SPBC30D10.15		chromosome_2	snoRNP assembly factor Naf1 (predicted)	4.35611	0.000158774	3.99495	0.000406078	2.88854	0.00668125
SPAC7D4.14c	iss10	chromosome_1	NURS complex subunit Iss10	4.26229	1.73183e-05	4.06178	3.25827e-05	1.16124	0.157195
SPAC22F8.06	pam1	chromosome_1	20S proteasome complex subunit beta 6 Pam1	1.00485	0.223273	4.06876	3.65473e-05	0.301632	0.710696
SPCC74.09	mug24	chromosome_3	RNA-binding protein, rrm type	-0.2933	0.397124	4.08381	1.44911e-11	0.0647622	0.850605
SPCC622.09	htb1	chromosome_3	histone H2B Htb1	1.69222	0.218967	4.3157	0.00369264	1.05476	0.439048
SPAP27G11.13c	nop10	chromosome_1	box H/ACA snoRNP complex protein (predicted)	2.19594	0.00566383	4.46248	2.29994e-06	1.73828	0.0241889
SPCC1223.02	nmt1	chromosome_3	4-amino-5-hydroxymethyl-2-methylpyrimidine phosphate synthase Nmt1	9.15276	4.68872e-06	4.64373	0.00643562	2.86461	0.0778232
SPAC2F3.17c	lsm6	chromosome_1	Lsm2-8 complex subunit Lsm6	-0.2933	0.860763	4.9856	0.00605039	1.91419	0.258693
SPAC1610.03c	crp79	chromosome_1	poly(A) binding protein Crp79	8.86828	5.15684e-15	5.02307	7.24227e-10	-0.688604	0.18904
SPBC29A10.02	spo5	chromosome_2	meiotic RNA-binding protein 1	9.22128	6.0954e-15	5.33702	5.52684e-10	-0.659051	0.228818
SPBC4F6.06	kin1	chromosome_2	microtubule affinity-regulating kinase Kin1	-0.477985	0.637044	6.00422	3.54182e-06	2.27278	0.0323985
SPAC4G9.08c	rpc2	chromosome_1	DNA-directed RNA polymerase III complex subunit Rpc2	2.03105	0.0647299	6.3409	3.18486e-06	2.94596	0.00977264
SPBC26H8.01	thi2	chromosome_2	thiazole biosynthetic enzyme	4.365	0.00313612	7.27365	1.29423e-05	5.97622	0.000151295
SPAC343.07	mug28	chromosome_1	RNA-binding protein Mug28	6.7672	1.57826e-13	8.2332	2.16928e-15	0.47049	0.311131
