# Supplementary material for: RNA-binding protein Mub1 and the nuclear RNA exosome act to fine-tune environmental stress response
Source: Life Sci Alliance. 2021 Nov 30;5(2):e202101111. doi: 10.26508/lsa.202101111 (PMC8645331; doi:10.26508/lsa.202101111)
Supplement: Supplementary file 4 [file LSA-2021-01111_TableS4.xlsx]

## Sheet: Description
Supplementary Tables
	Table S4 : GO analysis of proteins enriched/depleted more than 2-fold in RIC

## Sheet: Table 4
Proteins more than 2 fold enriched								proteins more than 2 fold depleted
		mtl1-1	rrp6D	dis3-54						mtl1-1	rrp6D	dis3-54
mRNA metabolic process	GO:0016071	51	54	36				mRNA metabolic process	GO:0016071	28	21	12
ribosome biogenesis	GO:0042254	45	52	55				ribosome biogenesis	GO:0042254	24	32	21
cytoplasmic translation	GO:0002181	23	21	1				cytoplasmic translation	GO:0002181	17	29	39
protein-containing complex assembly	GO:0065003	22	28	11				lipid metabolic process	GO:0006629	16	8	2
transcription, DNA-templated	GO:0006351	20	29	25				signaling	GO:0023052	15	3	7
regulation of transcription, DNA-templated	GO:0006355	13	17	11				nucleobase-containing small molecule metabolic process	GO:0055086	14	2	6
mitotic sister chromatid segregation	GO:0000070	12	12	1				vesicle-mediated transport	GO:0016192	13	7	10
tRNA metabolic process	GO:0006399	12	14	17				transmembrane transport	GO:0055085	12	4	2
regulation of mitotic cell cycle phase transition	GO:1901990	11	9	0				carbohydrate metabolic process	GO:0005975	11	4	6
cofactor metabolic process	GO:0051186	10	9	2				actin cytoskeleton organization	GO:0030036	10	2	9
signaling	GO:0023052	10	16	3				cellular amino acid metabolic process	GO:0006520	10	3	9
protein catabolic process	GO:0030163	9	8	1				protein-containing complex assembly	GO:0065003	10	9	12
chromatin organization	GO:0006325	8	12	11				regulation of transcription, DNA-templated	GO:0006355	9	9	7
mitochondrial gene expression	GO:0140053	8	6	3				sulfur compound metabolic process	GO:0006790	9	3	4
nucleocytoplasmic transport	GO:0006913	8	8	1				transcription, DNA-templated	GO:0006351	9	13	6
vesicle-mediated transport	GO:0016192	8	7	2				chromatin organization	GO:0006325	8	5	1
cellular amino acid metabolic process	GO:0006520	7	8	3				generation of precursor metabolites and energy	GO:0006091	8	4	6
protein modification by small protein conjugation or removal	GO:0070647	6	6	5				protein catabolic process	GO:0030163	8	2	6
snRNA metabolic process	GO:0016073	6	5	2				protein modification by small protein conjugation or removal	GO:0070647	8	1	6
sulfur compound metabolic process	GO:0006790	6	8	3				cofactor metabolic process	GO:0051186	7	7	7
conjugation with cellular fusion	GO:0000747	5	3	2				cell wall organization or biogenesis	GO:0071554	6	4	1
meiotic nuclear division	GO:0140013	5	6	0				detoxification	GO:0098754	6	3	1
nucleobase-containing small molecule metabolic process	GO:0055086	4	9	0				establishment or maintenance of cell polarity	GO:0007163	6	0	2
snoRNA metabolic process	GO:0016074	4	4	4				mitotic cytokinesis	GO:0000281	6	2	6
actin cytoskeleton organization	GO:0030036	3	6	2				tRNA metabolic process	GO:0006399	6	3	5
detoxification	GO:0098754	3	5	3				membrane organization	GO:0061024	5	4	2
DNA repair	GO:0006281	3	6	4				protein folding	GO:0006457	5	0	3
generation of precursor metabolites and energy	GO:0006091	3	9	1				microtubule cytoskeleton organization	GO:0000226	3	3	2
protein maturation	GO:0051604	3	2	0				protein glycosylation	GO:0006486	3	0	1
vitamin metabolic process	GO:0006766	3	4	2				protein targeting	GO:0006605	3	1	1
carbohydrate metabolic process	GO:0005975	2	5	3				ascospore formation	GO:0030437	2	2	3
cell wall organization or biogenesis	GO:0071554	2	3	1				autophagy	GO:0006914	2	0	0
DNA recombination	GO:0006310	2	5	1				conjugation with cellular fusion	GO:0000747	2	1	1
lipid metabolic process	GO:0006629	2	4	1				DNA repair	GO:0006281	2	2	3
microtubule cytoskeleton organization	GO:0000226	2	6	0				metal ion homeostasis	GO:0055065	2	1	0
mitotic cytokinesis	GO:0000281	2	3	1				mitotic sister chromatid segregation	GO:0000070	2	3	5
protein folding	GO:0006457	2	5	2				nucleocytoplasmic transport	GO:0006913	2	4	4
protein glycosylation	GO:0006486	2	1	0				protein maturation	GO:0051604	2	0	4
telomere organization	GO:0032200	2	1	1				regulation of mitotic cell cycle phase transition	GO:1901990	2	2	6
transmembrane transport	GO:0055085	2	4	5				snoRNA metabolic process	GO:0016074	2	2	1
ascospore formation	GO:0030437	1	2	1				vitamin metabolic process	GO:0006766	2	1	2
establishment or maintenance of cell polarity	GO:0007163	1	9	2				DNA replication	GO:0006260	1	2	2
membrane organization	GO:0061024	1	4	4				mitochondrial gene expression	GO:0140053	1	4	4
metal ion homeostasis	GO:0055065	1	2	2				mitochondrion organization	GO:0007005	1	0	0
nitrogen cycle metabolic process	GO:0071941	1	1	0				telomere organization	GO:0032200	1	1	0
protein targeting	GO:0006605	1	3	0				apoptotic process	GO:0006915	0	0	0
apoptotic process	GO:0006915	0	0	0				cell adhesion	GO:0007155	0	0	0
autophagy	GO:0006914	0	1	0				DNA recombination	GO:0006310	0	1	0
cell adhesion	GO:0007155	0	0	0				meiotic nuclear division	GO:0140013	0	1	2
DNA replication	GO:0006260	0	3	1				nitrogen cycle metabolic process	GO:0071941	0	0	0
mitochondrion organization	GO:0007005	0	1	0				organelle localization by membrane tethering	GO:0140056	0	0	0
organelle localization by membrane tethering	GO:0140056	0	1	1				peroxisome organization	GO:0007031	0	0	0
peroxisome organization	GO:0007031	0	0	0				snRNA metabolic process	GO:0016073	0	1	0
	total	357	447	237					total	321	216	239
Angeli analysis for the 3 most enriched GO
mRNA metabolic process (GO:0016071)	List frequency / Value	Background frequency / Value	p-Value					mRNA metabolic process (GO:0016071)	List frequency / Value	Background frequency / Value	p-Value
mtl1-1	27.18% (56/206)	6.02% (309/5136)	2.49725e-20					mtl1-1	14.87% (29/195)	6.02% (309/5136)	0.00478445
rrp6D	25.10% (62/247)	6.02% (309/5136)	1.26209e-20					rrp6D	15.65% (23/147)	6.02% (309/5136)	0.00451576
dis3-54	27.54% (38/138)	6.02% (309/5136)	6.2187e-14					dis3-54	N/S	6.02% (309/5136)
Ribosome biogenesis (GO:0042254)	List frequency / Value	Background frequency / Value	p-Value					Ribosome biogenesis (GO:0042254)	List frequency / Value	Background frequency / Value	p-Value
mtl1-1	22.33% (46/206)	6.93% (356/5136)	6.3688e-11					mtl1-1	N/S	6.93% (356/5136)
rrp6D	21.46% (53/247)	6.93% (356/5136)	4.59255e-12					rrp6D	25.17% (37/147)	6.93% (356/5136)	3.00139e-09
dis3-54	39.13% (54/138)	6.93% (356/5136)	1.14796e-25					dis3-54	18.12% (25/138)	6.93% (356/5136)	0.00243385
cytoplasmic translation (GO:0002181)	List frequency / Value	Background frequency / Value	p-Value					cytoplasmic translation (GO:0002181)	List frequency / Value	Background frequency / Value	p-Value
mtl1-1	11.17% (23/206)	4.77% (245/5136)	0.00967497					mtl1-1	N/S	4.77% (245/5136)
rrp6D	N/S	4.77% (245/5136)						rrp6D	19.73% (29/147)	4.77% (245/5136)	2.54497e-08
dis3-54	N/S	4.77% (245/5136)						dis3-54	28.26% (39/138)	4.77% (245/5136)	3.44185e-17
