# Supplementary material for: RNA-binding protein Mub1 and the nuclear RNA exosome act to fine-tune environmental stress response
Source: Life Sci Alliance. 2021 Nov 30;5(2):e202101111. doi: 10.26508/lsa.202101111 (PMC8645331; doi:10.26508/lsa.202101111)
Supplement: Supplementary file 6 [file LSA-2021-01111_TableS6.xlsx]

## Sheet: Description
Supplementary Tables
	Table S6 : FISH quantification data relative to Figure 4C

## Sheet: Table 6
	wt				rrp6D				srp40D				SPCC126.11cD				SPABC18H10.09D				pof8D				SPAC222.18D				SPBC530.08D				SPBC16G5.16D				swt1D				mlo1D				SPBC31F10.10cD				Data used to make the graph on Fig4C
	nucleus signal	cytoplam signal	ratio		nucleus signal	cytoplam signal	ratio		nucleus signal	cytoplam signal	ratio		nucleus signal	cytoplam signal	ratio		nucleus signal	cytoplam signal	ratio		nucleus signal	cytoplam signal	ratio		nucleus signal	cytoplam signal	ratio		nucleus signal	cytoplam signal	ratio		nucleus signal	cytoplam signal	ratio		nucleus signal	cytoplam signal	ratio		nucleus signal	cytoplam signal	ratio		nucleus signal	cytoplam signal	ratio
	2506.57	2507.54	0.999616		6047.39	2515.28	2.40426		3102.82	2131.33	1.45581		2809.22	1768.87	1.58815		2209.31	2342.82	0.943012		2521.94	1642.49	1.53543		2270.97	2036.14	1.11533		2440.21	1911.18	1.27681		1736.06	1631.26	1.06424		2393.91	1945.03	1.23078		2438.8	1903.97	1.2809		2015.99	1825.94	1.10409
	2491.97	2313	1.07737		5748.57	2268.41	2.53418		2256.04	1955.23	1.15385		2992.43	1759.49	1.70074		2224.91	2259.3	0.984778		2557.75	1703.37	1.50158		2491.89	2144.78	1.16184		2476	1825.11	1.35663		1753.11	1641.72	1.06785		2229.8	2066.87	1.07883		2441.26	1860.99	1.31181		1972.97	1795.59	1.09879
	2470.16	2405.95	1.02669		5113.7	2514.84	2.03341		2535.5	1878.22	1.34995		2870.2	1722.51	1.66629		2111.59	2185.82	0.966044		2295.2	1641.06	1.39861		2239.4	2073.3	1.08011		2508.82	1861.01	1.34809		2644.35	2194.09	1.20521		2474.36	1979.11	1.25024		2399.49	1947.63	1.232		1983.46	1796.02	1.10437
	2157.53	2174	0.992423		8666.5	1781.87	4.8637		2587.36	1955.04	1.32343		2282.25	1673.37	1.36386		2058.99	2108.45	0.976543		2561.91	1947.26	1.31565		2292.18	2025.38	1.13173		2474.45	1881.08	1.31544		2942.94	2349.25	1.25272		2398.62	2065.06	1.16153		2433.8	1842.84	1.32068		2123.07	1922.61	1.10426
	2430.3	2483.8	0.978458		3295.31	1704.16	1.93369		2521.96	1970.8	1.27966		2600.33	1774.26	1.46559		2028.39	2200.04	0.921977		2301.05	1883	1.22201		2474.91	1916.4	1.29144		2413.51	1923.83	1.25453		2723.41	2209.76	1.23244		2402.42	1985.23	1.21015		2621.54	1914.65	1.3692		1992.07	1833.87	1.08627
	2380.45	2443.6	0.974156		2091.33	1612.58	1.29689		2678.18	1932.18	1.38609		2825.4	1784.95	1.5829		2183.74	2250.37	0.97039		2201.32	1848.76	1.1907		2197.28	1842.04	1.19285		2573.94	1924.74	1.33729		2618.96	2170.16	1.2068		2393.24	2007	1.19245		2415.97	1880.82	1.28453		1978.58	1866.87	1.05984
	2203.07	2421.34	0.909853		1825.38	1643.73	1.11051		2381.49	1823.17	1.30624		2592.66	1820.49	1.42416		2216.68	2073	1.06931		2351.03	1757.39	1.3378		2132.01	1785.45	1.1941		2430.26	1840.34	1.32055		2861.75	2276.76	1.25694		2391.77	1961.8	1.21917		2462.57	1826.29	1.3484		1837.03	1858.31	0.988552
	2425.45	2259.07	1.07365		3393.76	2310.57	1.4688		2578.54	1995.96	1.29188		2416.46	1707.24	1.41541		2092.61	2346.41	0.891838		2458.64	1832.55	1.34165		1977.18	1792.44	1.10307		2600.76	1905.84	1.36463		2937.83	2429.25	1.20936		2226.04	1954.12	1.13915		2352.67	1830.76	1.28508		1883.29	1808.06	1.04161
	2305.7	1902.61	1.21186		6832.84	2772.06	2.4649		2594.57	1868.64	1.38848		2821.03	1721.46	1.63874		1984.44	2367.89	0.838062		2295.73	1627.48	1.41061		1994.22	1750.59	1.13917		2265.6	1889.85	1.19882		2808.4	2148.46	1.30717		2205.79	1920.83	1.14836		2299.51	1768.79	1.30004		2092.69	1888.51	1.10812
	2784.18	2719.82	1.02366		2896.26	2117.2	1.36797		2949.42	2039.58	1.44609		2632.92	1769.01	1.48836		2254.05	2148.53	1.04911		2078.22	1575.67	1.31894		2211.66	1792.04	1.23416		2251.35	1953.83	1.15227		2881.55	2356.36	1.22288		2216	1994.67	1.11096		2783.14	1872.92	1.48599		2013.75	1862.88	1.08099
	2371.84	3253.5	0.729013		2537.92	2365.88	1.07272		2752.1	2028.93	1.35643		2545.36	1756.1	1.44944		1578.53	1643.64	0.960388		1788.03	1666.51	1.07292		2160.45	2024.6	1.0671		2107.62	1773.42	1.18845		2621.64	2239.34	1.17072		2326.97	1986.09	1.17164		2337.43	1813.18	1.28913		1950.58	1824.66	1.06901
	2658.64	2466.03	1.0781		5004.15	2432.38	2.05731		2460.13	1965.09	1.25192		2611.14	1664.71	1.56853		2219.75	2466.24	0.900052		1756.15	1679.1	1.04589		3077.74	2067.13	1.4889		2246.17	1796.59	1.25024		2614.94	2206.52	1.1851		2331.55	1937.89	1.20313		2097.93	1818.67	1.15355		2019.55	1844.94	1.09464
	2490.81	2563.16	0.971775		10363.6	2796.59	3.7058		2825.29	2168.27	1.30301		2523.67	1819.1	1.38732		2131.93	2679.24	0.79572		1859.58	1695.81	1.09657		2814.09	2160.28	1.30265		2428.24	1949.78	1.24539		2555.56	2257.95	1.1318		2381.69	1936.92	1.22963		2109.34	1773.98	1.18904		2020.42	1920.94	1.05179
	2014.78	2185.75	0.921781		4658.35	2308.24	2.01814		2511.36	1942.75	1.29268		2391.8	1812.64	1.31951		2298.22	2405.55	0.955385		1754.07	1660.24	1.05651		2658.75	2184.03	1.21736		2348.01	1678.94	1.39851		2502.56	2082.84	1.20151		2283.32	1972.55	1.15755		2360.32	1886.49	1.25117		1885.07	1852.1	1.0178		T-test used to make the graph Fig4C
	1983.7	1798.36	1.10306		4074.38	2268.26	1.79626		2688.91	1863.64	1.44282		2714.82	1870.26	1.45158		2355.39	2511.81	0.937728		1763.53	1626.27	1.0844		2538.34	1788.14	1.41954		2495	1875.18	1.33054		2630.89	2153.49	1.22169		2215.24	1916.53	1.15586		2391.94	1791.18	1.3354		1824.48	1846.11	0.988285
	1777.2	1772.76	1.0025		5237.77	3004.56	1.74327		2717.91	1967.29	1.38155		2784.96	1951.77	1.42689		2309.09	2142.11	1.07795		1758.03	1712.16	1.02679		3143.1	2460.64	1.27735		2582.33	1969.14	1.3114		3012.47	2280.98	1.32069		2282.73	1908.85	1.19587		2402.42	1807.25	1.32932		1772.79	1838.57	0.96422
	1762.61	1735.65	1.01553		3799.08	2230.05	1.70358		2729.72	2034.4	1.34178		2475.51	1895.22	1.30618		2542.49	2310.75	1.10029		1769.62	1656.56	1.06825		2942.16	2813.82	1.04561		2400.96	1935.11	1.24074		3007.38	2419.89	1.24277		2196.27	1932.17	1.13668		2324.1	1729.14	1.34408		1702.04	1844.34	0.922844
	2214.11	2319.48	0.954571		5412.67	2516.7	2.15071		2542.31	1881.76	1.35103		2516.21	1844.96	1.36383		2277.59	2565.03	0.887936		1704.15	1684.23	1.01182		2873.92	2319.79	1.23887		2659.6	1897.63	1.40153		2709.28	2123.59	1.27581		2462.95	2214.82	1.11203		2515.56	1925.78	1.30626		1788.35	1916.4	0.933183
	1869.02	1905.28	0.980967		3063.92	1794.31	1.70758		2526.46	1952.57	1.29391		2538.45	1883.11	1.34801		2368.94	2665.55	0.888725		1728.27	1647.93	1.04875		3269.3	2698.01	1.21174		2394.93	1687.97	1.41882		2732.84	2149.78	1.27122		2545.22	2214.85	1.14916		2610.61	1901.52	1.37291		1784.79	1970.97	0.905537
	1923.38	1974.29	0.974213		4846.82	1849.4	2.62076		2810	2007.74	1.39958		2697.11	1969.03	1.36977		2280.52	2264.83	1.00693		1752.22	1602.44	1.09347		2902.31	2441.01	1.18898		2197.19	2002.67	1.09713		2758.71	2192.3	1.25837		2886.75	2316.51	1.24616		2675.38	1895.45	1.41147		1826.87	1881.08	0.971181
	1863.93	1812.82	1.02819		2290.88	2034.41	1.12606		2552.64	1886.2	1.35332		2379.94	1858.92	1.28028		2278.04	2439.36	0.933868		1748.35	1658.71	1.05404		3381.8	2517.88	1.34311		2301.98	1905.26	1.20822		2634.77	2186.18	1.2052		2784.5	2083.73	1.33631		2582.3	2020.5	1.27805		1829.69	1898.16	0.963928
	1803.2	1793.3	1.00552		7988.25	2761.18	2.89306		2494.19	2016.03	1.23718		2466.82	1700.23	1.45088		2172.99	1899.12	1.1442		2577.66	1875.96	1.37405		2732.42	2561.68	1.06665		2250.81	1864.93	1.20692		2467.75	2076.18	1.1886		2741.56	2236.82	1.22565		2535.79	2019.33	1.25576		1851.65	1897.29	0.975946
	2231.36	1824.79	1.2228		2406.67	1886.68	1.27561		2475.96	1931.38	1.28197		2532.21	1909.5	1.32611		1968.31	2160.5	0.911043		2379.99	1832.04	1.29909		2575.63	2410.16	1.06866		1918.77	1689.01	1.13603		2686.8	2074.12	1.29539		2846.62	2191.84	1.29874		2659.03	1984.91	1.33962		1872.81	1881.48	0.995392
	2155.23	2239.16	0.96252		3210.24	2027.03	1.58372		2601.84	1914.51	1.35901		2681.89	1852.51	1.4477		2299.51	2450.97	0.9382		2449.51	1750.99	1.39893		3056.84	2496.28	1.22456		1978.49	1679.21	1.17823		2645.8	1988.4	1.33062		2498.98	2161.59	1.15609		2565.6	1947.86	1.31714		1828.49	1974.95	0.925843
	2397.93	2114.78	1.13389		4801.95	2235.43	2.14811		2414.64	1929.08	1.25171		2482.28	1766.06	1.40554		2381.33	2462.38	0.967084		2411.49	1831.63	1.31658		2738.49	2156.39	1.26994		2016.84	1708.68	1.18035		2421.03	2025.21	1.19545		3066.7	2233.81	1.37286		2455.31	1945.78	1.26186		1820.55	1859.64	0.978982
	2141.26	2080.26	1.02932		4090.21	2295.62	1.78175		2589.82	1723.22	1.50289		2237.93	1789.26	1.25076		2168.92	2173.99	0.997668		2492.54	1878.6	1.32681		2490.32	2105.84	1.18258		2054.67	1766.2	1.16332		2265.57	2042.23	1.10936		2849.8	2363.31	1.20585		2451.82	1833.66	1.33712		1750.34	2004.33	0.873278
	2565.86	2440.51	1.05136		3238.29	2022.36	1.60125		2616.37	1896.99	1.37922						2124.05	2269.4	0.935954		2604.59	1856.21	1.40318		2107.21	1919.71	1.09767		2090.65	1717.09	1.21756		2468.26	2050.18	1.20393		2756.16	2318.62	1.1887		2689.78	1867.51	1.4403		1809.23	1977.21	0.915042
	2397.76	2587.43	0.926696		3302.96	1968.05	1.67829		2445.92	1912.6	1.27885						1954.42	2181.62	0.895856		2645.41	1896.94	1.39456						1960.1	1705.43	1.14933		2393.58	2127.4	1.12512		3215.47	2319.39	1.38634		2437.3	1900.49	1.28246		1868.59	1987.33	0.940252
	2582.6	2301.75	1.12202		6117.15	2044.27	2.99234		2864.14	1933.39	1.48141						2262.01	2171.14	1.04185		2610.12	1818.98	1.43494						2076.24	1724.76	1.20378		2425.58	2166.24	1.11972		3043.09	2374.39	1.28163		2497.46	1854.23	1.3469		1745.29	1953.46	0.893433
	2290.25	2104.41	1.08831		9356.25	2202.86	4.24732		2571.7	1924.11	1.33656										2658.93	1954.61	1.36034						1952.96	1715.6	1.13836		2560.34	2088.34	1.22602		2876.45	2045.07	1.40653		2367.22	1801.46	1.31406		1799.57	1945.42	0.925026
	2294.31	2299.62	0.997689		4637.25	1837.18	2.52411		2561.74	1968.93	1.30108										2658.7	1874.47	1.41837						1982.25	1707.43	1.16095		2269.53	1947.4	1.16542		2935.82	2376.74	1.23523		2375.3	1779.58	1.33476		1785.18	1940.92	0.91976
	2504.97	2548.96	0.982743		3644.32	1858.56	1.96083		2682.73	1937.63	1.38454										2740.26	1961.93	1.39672						2102.11	1699.52	1.23688		2361.99	2027.35	1.16506		2929.51	2265.23	1.29325		2440.91	1805.06	1.35226		1818.9	1803.22	1.0087
	2593.6	2561.1	1.01269						2659.08	1987.38	1.33798										2580.92	1813.26	1.42336						2093.08	1686.26	1.24125		2680.05	2190.67	1.22339		3028.18	2029.96	1.49175		2093.7	1799.47	1.16351		1711.32	1930.71	0.886368
	2357.13	2586.56	0.911302						2678.01	2140.97	1.25084										2473.35	1925.78	1.28434						2119.98	1726.67	1.22778		2546.38	2022.68	1.25891		3168.41	2251.51	1.40724		2052.2	1735.74	1.18232		1802.82	1956.81	0.921305
									2689.76	2068.43	1.30039										2602.7	1966.87	1.32327						2126.16	1782.71	1.19266		2283.32	2055.94	1.1106		2602.56	1875.45	1.3877		2411.08	1799.28	1.34002
									2476.13	1959.36	1.26374										2525.67	1917.21	1.31737						2159.86	1745.86	1.23714		2555.92	2122.15	1.2044		2559.84	2105.7	1.21567		2309.87	1726.57	1.33784
									2747.02	2239.3	1.22674										2260.61	1775.05	1.27355						2137.39	1784.14	1.19799		2406.1	1997.43	1.2046		2701.44	2105.39	1.28311		2287.97	1847.48	1.23843
									2696.51	1949.85	1.38293										2523.81	1824.53	1.38326						2047.71	1695.13	1.20799		2560.2	2206.79	1.16014		2941.34	2244.95	1.3102		2233.58	1732.96	1.28888
									2757.4	2011.98	1.37049																		1952.74	1708.11	1.14322		2244.79	1843.56	1.21764		3042.74	2254.96	1.34935		2031.84	1783.45	1.13927
									2485.26	2209.37	1.12487																		2037.49	1730.12	1.17766		2265.38	1992.87	1.13674		2325.34	1892.32	1.22883		2170.88	1757.09	1.2355
									2623.66	2072.16	1.26615																		2046.98	1708.11	1.19839		3024.05	2115.27	1.42963		2753.81	2244.67	1.22682		2244.86	1782.8	1.25918
									2598.01	1942.36	1.33755																		1953.73	1697.38	1.15103		2854.61	2324.71	1.22794		2688.52	2027.96	1.32573		2264.98	1766.58	1.28213
									2233.76	1911.48	1.1686																		1852.17	1693.43	1.09374		2572.88	2200.74	1.1691		2639.2	2231.99	1.18244		2491.52	1770.92	1.40691
									2453.36	2012.42	1.21911																		1826.81	1679.08	1.08799						2685.11	2005.71	1.33873		2074.43	1747.46	1.18711
									2548.59	1964.84	1.2971																		2024.8	1674.73	1.20903						3105.68	2422.36	1.28209		2171.43	1807.11	1.2016
									2556.02	1895.86	1.34821																		2079.7	1730.36	1.20189						3059.58	2314.67	1.32182		2074.61	1761.73	1.1776
									2456.57	1936.96	1.26826																		1932.61	1678.93	1.15109						2889.38	2287.21	1.26328		2011.07	1808.53	1.11199
									2418.16	1999.53	1.20936																		2003.42	1737.99	1.15272						2469.46	2009.3	1.22901		2162.64	1786.9	1.21027
									2177.63	1787.14	1.2185																		2377.85	1798.81	1.3219						2428.27	2103.07	1.15463		2034.3	1754.45	1.15951
									2662.16	1915.17	1.39004																		2180.74	1857.39	1.17409						2785.99	2089.84	1.33311		2213.85	1836.23	1.20565
									2210.33	1886.93	1.17139																		2436.33	1827.06	1.33347						2629.75	2090.29	1.25808		2319.6	1810.96	1.28086
									2260.25	2004.73	1.12746																		2428.21	1885.63	1.28774						2529.31	2058.48	1.22873		2294.65	1805.4	1.27099
									2133.62	1738.02	1.22762																		2434.91	1736.43	1.40225						2649.83	2041.57	1.29794
									2037.07	1767.05	1.15281																		2469.93	1832.91	1.34754						2628.17	2043.18	1.28632
									2395.76	1771.65	1.35227																		2371.19	1842.54	1.28691						2388.65	2069.24	1.15436
									2610.63	1758.52	1.48456																		2323.38	1868.92	1.24317
									2546.87	1782.9	1.4285																		2407.82	1861.13	1.29374
									2489.97	1886.2	1.32009																		2390.55	1768.78	1.35152
									2424.32	1924.43	1.25976																		2320.36	1854.59	1.25114
									2585.48	1850.87	1.3969																		2465.51	1939.47	1.27123
									2728.15	1836.05	1.48587																		2522.65	1890.57	1.33433
									2310.12	1714.22	1.34763																		2345.28	1884.05	1.24481
																													2337.7	1815.04	1.28796
																													2327.33	1807.22	1.2878
																													2357.02	1616	1.45855
																													2247.48	1810.17	1.24159
																													2236.67	1784.27	1.25355
mean			1.01395				2.12084				1.31741				1.44179				0.961652				1.27266				1.19834				1.24676				1.2088				1.24443				1.28348				0.994665
number of cells			34				32				62				26				29				0.152225				0.109865				0.0846944				43				55				52				0.0755014
standard deviation			0.0905145				0.875031				0.0902257				0.119598				0.0778296				38				27				67				0.0708395				0.0875701				0.0790377				34
confident interval			0.0304247				0.303177				0.0224586				0.0459712				0.0283266				0.0483998				0.0414406				0.0202799				0.0211733				0.0231432				0.0214823				0.0253784
