# Supplementary material for: RNA-binding protein Mub1 and the nuclear RNA exosome act to fine-tune environmental stress response
Source: Life Sci Alliance. 2021 Nov 30;5(2):e202101111. doi: 10.26508/lsa.202101111 (PMC8645331; doi:10.26508/lsa.202101111)
Supplement: Supplementary file 7 [file LSA-2021-01111_TableS7.xlsx]

## Sheet: Description
Supplementary Tables
	Table S7 : List of up-regulated genes (> 1.5-fold) in mub1D

## Sheet: Table 7
ID	log2FoldChange	pvalue	TU.class	chromosome	start	end	strand	map.ids
TU.3570	0.896842	5.64e-28	multicistronic	chromosome1	108780	110622	-	gene:SPAC11D3.01c;gene:SPAC11D3.02c
TU.1501	0.853417	2.28e-18	multicistronic	chromosome1	5177943	5180422	+	gene:SPAC26F1.04c;gene:SPNCRNA.260
TU.1479	1.32076	1.04e-06	multicistronic	chromosome1	5124015	5125476	+	gene:SPAC29A4.12c;gene:SPAC29A4.22
TU.2494	0.699094	3.15e-15	multicistronic	chromosome2	3089036	3091423	+	gene:SPBC30D10.05c;gene:SPBC30D10.21
TU.6163	0.709437	5.59e-17	multicistronic	chromosome2	3580767	3583835	-	gene:SPBC418.01c;gene:SPNCRNA.1618
TU.5299	1.28001	5.62e-37	multicistronic	chromosome2	449580	453036	-	gene:SPBC428.05c;gene:SPBC428.06c
TU.6310	0.625281	1.76e-12	multicistronic	chromosome2	4103246	4105973	-	gene:SPBC56F2.06;gene:SPBC56F2.15
TU.3544	0.632152	2.79e-15	multicistronic	chromosome3	2422742	2427882	+	gene:SPCC569.05c;gene:SPNCRNA.1297
TU.6945	0.757739	8.11e-14	multicistronic	chromosome3	2084760	2086449	-	gene:SPCC576.03c;gene:SPNCRNA.1259
TU.6825	1.35808	1.01e-48	multicistronic	chromosome3	1644882	1648811	-	gene:SPCC663.06c;gene:SPCC663.07c;gene:SPCC663.08c
TU.6395	0.694792	2.55e-11	multicistronic	chromosome2	4464896	4466272	-	gene:SPNCRNA.1696;gene:SPNCRNA.532
TU.6594	2.43676	3.6e-18	nc-TU	chromosome3	717495	719331	-	gene:SPCC18B5.02c
TU.1507	0.765011	0.00442355	nc-TU	chromosome1	5200717	5201883	+	gene:SPNCRNA.1059
TU.3240	0.686512	0.0350765	nc-TU	chromosome3	1371617	1372406	+	gene:SPNCRNA.1190
TU.6803	0.698064	0.000275068	nc-TU	chromosome3	1565890	1570437	-	gene:SPNCRNA.1206
TU.6927	0.95665	3.51e-06	nc-TU	chromosome3	2000928	2003831	-	gene:SPNCRNA.1252
TU.3466	0.631611	0.0394242	nc-TU	chromosome3	2123677	2124299	+	gene:SPNCRNA.1265
TU.6982	1.27393	4.5e-07	nc-TU	chromosome3	2204113	2205486	-	gene:SPNCRNA.1271
TU.3524	1.19019	0.000104918	nc-TU	chromosome3	2331347	2332536	+	gene:SPNCRNA.1289
TU.1763	2.88703	0.000489239	nc-TU	chromosome2	626194	626720	+	gene:SPNCRNA.1376
TU.5613	0.592452	0.000291354	nc-TU	chromosome2	1566010	1568791	-	gene:SPNCRNA.1447
TU.2556	0.709582	0.000296665	nc-TU	chromosome2	3310306	3311294	+	gene:SPNCRNA.1591
TU.6374	0.675008	0.00300913	nc-TU	chromosome2	4367239	4368175	-	gene:SPNCRNA.1688
TU.1429	0.938767	0.00224974	nc-TU	chromosome1	4962458	4962872	+	gene:SPNCRNA.256
TU.3532	0.620432	0.0273194	nc-TU	chromosome3	2362254	2362670	+	gene:SPNCRNA.519
TU.3955	0.697314	2.6e-06	nc-TU	chromosome1	1392985	1393556	-	gene:SPNCRNA.58
TU.0084	1.3662	0.00461462	nc-TU	chromosome1	300755	301380	+	gene:SPNCRNA.635
TU.3775	1.08894	6.23e-09	nc-TU	chromosome1	799385	799949	-	gene:SPNCRNA.687
TU.0308	0.755209	8.46e-06	nc-TU	chromosome1	1101785	1103720	+	gene:SPNCRNA.712
TU.4418	1.79132	2.05e-51	nc-TU	chromosome1	2939214	2940412	-	gene:SPNCRNA.863
TU.1231	1.14692	1.81e-08	nc-TU	chromosome1	4294337	4294738	+	gene:SPNCRNA.976
TU.5274	2.66359	8.97e-18	nc-TU	chromosome2	355997	356784	-
TU.4176	1.44962	3.66e-10	nc-TU	chromosome1	2112100	2113585	-
TU.0585	1.0104	4.47e-08	nc-TU	chromosome1	2095039	2095687	+
TU.1261	0.883054	0.000223217	nc-TU	chromosome1	4400989	4401387	+
TU.3374	0.837912	0.000404716	nc-TU	chromosome3	1796206	1796748	+
TU.5470	0.790914	0.000462271	nc-TU	chromosome2	1080678	1081195	-
TU.1705	0.592448	0.000597164	nc-TU	chromosome2	444435	445364	+
TU.0224	0.745452	0.000641186	nc-TU	chromosome1	765697	766529	+
TU.1708	0.902315	0.000732189	nc-TU	chromosome2	451194	451465	+
TU.4894	0.834101	0.00258956	nc-TU	chromosome1	4581723	4581939	-
TU.3606	0.739205	0.00266185	nc-TU	chromosome1	213948	214886	-
TU.6949	2.03491	0.00277068	nc-TU	chromosome3	2096612	2096856	-
TU.2534	0.631888	0.00399233	nc-TU	chromosome2	3234711	3235376	+
TU.1355	0.635422	0.00444785	nc-TU	chromosome1	4751771	4752231	+
TU.2632	0.697042	0.00862743	nc-TU	chromosome2	3573310	3573735	+
TU.5338	0.601707	0.0090386	nc-TU	chromosome2	592167	592565	-
TU.4275	1.13499	0.00927671	nc-TU	chromosome1	2439576	2440870	-
TU.5070	1.18043	0.00982931	nc-TU	chromosome1	5141728	5142083	-
TU.3602	0.593027	0.0106338	nc-TU	chromosome1	203908	204246	-
TU.3758	1.01177	0.0108664	nc-TU	chromosome1	736858	737094	-
TU.6426	1.20222	0.0116321	nc-TU	chromosome3	89897	90150	-
TU.5641	1.00735	0.0117597	nc-TU	chromosome2	1695168	1695553	-
TU.3052	1.03594	0.0151448	nc-TU	chromosome3	567796	568182	+
TU.5229	0.599529	0.0159654	nc-TU	chromosome2	205616	206326	-
TU.0139	0.993318	0.0192126	nc-TU	chromosome1	486052	486371	+
TU.5277	0.829819	0.0260822	nc-TU	chromosome2	362422	362818	-
TU.0839	0.69358	0.0274691	nc-TU	chromosome1	2958085	2958929	+
TU.1687	0.665368	0.0341946	nc-TU	chromosome2	389637	389929	+
TU.6172	0.63687	0.0363986	nc-TU	chromosome2	3625383	3625762	-
TU.0768	1.10707	6.06e-07	novel nc-TU	chromosome1	2714520	2717156	+
TU.2592	1.14842	7.71e-06	novel nc-TU	chromosome2	3436775	3437256	+
TU.5073	1.82973	0.000558185	novel nc-TU	chromosome1	5144284	5145012	-
TU.0044	0.657065	0.00159443	novel nc-TU	chromosome1	141772	142171	+
TU.0028	2.02146	0.00246202	novel nc-TU	chromosome1	102071	102391	+
TU.0636	1.36005	0.00250161	novel nc-TU	chromosome1	2283938	2284193	+
TU.0924	0.659506	0.00305714	novel nc-TU	chromosome1	3242579	3243029	+
TU.1187	1.54816	0.00306565	novel nc-TU	chromosome1	4141685	4142284	+
TU.6650	1.16584	0.00387829	novel nc-TU	chromosome3	939962	940278	-
TU.0972	1.65624	0.00420553	novel nc-TU	chromosome1	3415715	3415968	+
TU.0029	2.8897	0.00516001	novel nc-TU	chromosome1	103026	103278	+
TU.5953	2.24717	0.00552644	novel nc-TU	chromosome2	2807654	2808882	-
TU.5639	1.62681	0.005971	novel nc-TU	chromosome2	1688354	1689469	-
TU.5787	1.26149	0.00632752	novel nc-TU	chromosome2	2201388	2202233	-
TU.6336	0.973252	0.00932354	novel nc-TU	chromosome2	4227923	4228421	-
TU.3457	1.4908	0.0101	novel nc-TU	chromosome3	2095496	2095970	+
TU.4708	1.14802	0.0108677	novel nc-TU	chromosome1	3969044	3969270	-
TU.6940	1.9786	0.0159826	novel nc-TU	chromosome3	2058814	2059052	-
TU.3765	0.76633	0.0175478	novel nc-TU	chromosome1	766932	767207	-
TU.5305	1.40513	0.0196862	novel nc-TU	chromosome2	477871	478140	-
TU.1113	1.027	0.0227876	novel nc-TU	chromosome1	3889930	3890444	+
TU.2004	1.43882	0.0242069	novel nc-TU	chromosome2	1476903	1477139	+
TU.6939	1.14335	0.0247637	novel nc-TU	chromosome3	2057304	2058262	-
TU.0567	0.903688	0.0255744	novel nc-TU	chromosome1	2034354	2035052	+
TU.2800	1.37996	0.0273879	novel nc-TU	chromosome2	4158078	4159331	+
TU.1498	1.79355	0.0288927	novel nc-TU	chromosome1	5173983	5174603	+
TU.3789	1.27555	0.0303788	novel nc-TU	chromosome1	849531	849941	-
TU.1229	1.32386	0.0329018	novel nc-TU	chromosome1	4287041	4287268	+
TU.4055	2.1071	0.0361236	novel nc-TU	chromosome1	1727218	1727474	-
TU.5358	0.676894	0.0391416	novel nc-TU	chromosome2	661737	662273	-
TU.1497	0.805964	0.0409855	novel nc-TU	chromosome1	5170957	5171680	+
TU.1485	0.778449	0.0455476	novel nc-TU	chromosome1	5139502	5139753	+
TU.4080	0.615369	1.83e-08	ORF-TU	chromosome1	1808006	1809296	-	gene:SPAC1002.07c
TU.4088	1.21627	2.83e-46	ORF-TU	chromosome1	1830659	1831785	-	gene:SPAC1002.17c
TU.0510	1.37343	2.65e-59	ORF-TU	chromosome1	1835314	1836963	+	gene:SPAC1002.19
TU.1577	1.30706	0.000138641	ORF-TU	chromosome1	5470852	5471443	+	gene:SPAC1039.10
TU.1028	0.689547	5.33e-12	ORF-TU	chromosome1	3635377	3636506	+	gene:SPAC1142.05
TU.0045	0.675239	6.01e-06	ORF-TU	chromosome1	142383	144695	+	gene:SPAC11D3.17
TU.3580	0.784856	3.05e-05	ORF-TU	chromosome1	144837	146383	-	gene:SPAC11D3.18c
TU.0031	0.922446	0.00850708	ORF-TU	chromosome1	106965	107252	+	gene:SPAC11D3.19
TU.1366	1.23325	9.62e-11	ORF-TU	chromosome1	4780265	4781841	+	gene:SPAC11H11.04
TU.3836	0.628941	1.42e-12	ORF-TU	chromosome1	1019169	1020679	-	gene:SPAC139.02c
TU.4197	0.761323	0.00697872	ORF-TU	chromosome1	2184894	2185503	-	gene:SPAC13F5.07c
TU.4234	1.06109	1.5e-21	ORF-TU	chromosome1	2295567	2297953	-	gene:SPAC13G7.02c
TU.5107	0.914045	2.71e-13	ORF-TU	chromosome1	5225157	5226011	-	gene:SPAC14C4.01c
TU.3924	0.701703	3.62e-06	ORF-TU	chromosome1	1295538	1296531	-	gene:SPAC1565.04c
TU.4631	1.49217	2.32e-22	ORF-TU	chromosome1	3721280	3721786	-	gene:SPAC15E1.02c
TU.0438	1.18333	8.89e-20	ORF-TU	chromosome1	1568823	1569451	+	gene:SPAC1705.02
TU.1164	1.19999	3.25e-44	ORF-TU	chromosome1	4060049	4061343	+	gene:SPAC19G12.09
TU.4732	0.621966	4.61e-17	ORF-TU	chromosome1	4061371	4064977	-	gene:SPAC19G12.10c
TU.5003	0.730017	4.29e-14	ORF-TU	chromosome1	4937760	4938976	-	gene:SPAC1B3.06c
TU.5009	1.38592	1.52e-26	ORF-TU	chromosome1	4958655	4960998	-	gene:SPAC1B3.16c
TU.0193	0.791233	0.0349892	ORF-TU	chromosome1	667882	669477	+	gene:SPAC1D4.13
TU.4786	0.754071	1.22e-12	ORF-TU	chromosome1	4233042	4235528	-	gene:SPAC1F7.07c
TU.1212	0.603808	5.85e-11	ORF-TU	chromosome1	4235089	4237805	+	gene:SPAC1F7.08
TU.0398	0.644336	5.72e-17	ORF-TU	chromosome1	1393613	1395781	+	gene:SPAC20G8.03
TU.3956	0.661318	7.66e-11	ORF-TU	chromosome1	1395788	1398251	-	gene:SPAC20G8.04c
TU.1218	1.01334	7.64e-16	ORF-TU	chromosome1	4254731	4255653	+	gene:SPAC21E11.04
TU.3818	0.62601	1.55e-10	ORF-TU	chromosome1	957505	958718	-	gene:SPAC222.08c
TU.3701	0.67619	1.35e-10	ORF-TU	chromosome1	529257	530164	-	gene:SPAC227.17c
TU.3882	0.647439	1.03e-13	ORF-TU	chromosome1	1163737	1165539	-	gene:SPAC22A12.06c
TU.3891	0.712509	0.00894928	ORF-TU	chromosome1	1188176	1189153	-	gene:SPAC22A12.17c
TU.1371	0.594312	2.73e-11	ORF-TU	chromosome1	4791799	4795154	+	gene:SPAC22F8.05
TU.0671	1.89461	1.09e-57	ORF-TU	chromosome1	2381192	2382138	+	gene:SPAC22H10.13
TU.3797	0.70146	1.45e-11	ORF-TU	chromosome1	893272	894479	-	gene:SPAC22H12.01c
TU.4828	0.875801	6.69e-24	ORF-TU	chromosome1	4342181	4344018	-	gene:SPAC23D3.04c
TU.4836	0.798376	3.62e-06	ORF-TU	chromosome1	4366410	4367032	-	gene:SPAC23D3.17
TU.4300	1.75946	1.68e-37	ORF-TU	chromosome1	2523430	2524843	-	gene:SPAC23H3.15c
TU.4006	0.588081	0.00263341	ORF-TU	chromosome1	1585842	1586397	-	gene:SPAC23H4.21
TU.1151	0.854626	0.013857	ORF-TU	chromosome1	4008552	4008941	+	gene:SPAC27E2.13
TU.0825	0.703468	1.94e-11	ORF-TU	chromosome1	2923191	2924643	+	gene:SPAC2E1P3.01
TU.4433	1.856	5.8e-41	ORF-TU	chromosome1	2999687	3001509	-	gene:SPAC31G5.09c
TU.0412	0.682593	7.4e-14	ORF-TU	chromosome1	1454442	1456868	+	gene:SPAC3A12.18
TU.4172	2.4225	7.37e-232	ORF-TU	chromosome1	2094069	2095421	-	gene:SPAC3C7.14c
TU.1556	0.866511	3.15e-14	ORF-TU	chromosome1	5388253	5389658	+	gene:SPAC3G6.05
TU.3723	1.24711	2.02e-26	ORF-TU	chromosome1	604490	606814	-	gene:SPAC3H8.09c
TU.1401	0.767837	9.97e-05	ORF-TU	chromosome1	4878236	4878593	+	gene:SPAC4F10.22
TU.0639	0.67259	2.78e-10	ORF-TU	chromosome1	2291681	2292680	+	gene:SPAC4G9.22
TU.4658	1.1333	1.96e-12	ORF-TU	chromosome1	3826662	3829248	-	gene:SPAC4H3.03c
TU.4659	0.592692	0.00252497	ORF-TU	chromosome1	3830881	3832209	-	gene:SPAC4H3.04c
TU.1095	0.758949	0.00145446	ORF-TU	chromosome1	3841582	3842664	+	gene:SPAC4H3.08
TU.4656	0.747673	0.0214286	ORF-TU	chromosome1	3821955	3822530	-	gene:SPAC4H3.17
TU.0354	0.816884	1.4e-19	ORF-TU	chromosome1	1243884	1245721	+	gene:SPAC56E4.03
TU.0053	0.738044	6.77e-11	ORF-TU	chromosome1	162471	164370	+	gene:SPAC5H10.10
TU.1300	1.26156	1.07e-21	ORF-TU	chromosome1	4542107	4543483	+	gene:SPAC637.03
TU.0653	0.611055	7.31e-08	ORF-TU	chromosome1	2327832	2330265	+	gene:SPAC6C3.04
TU.4489	0.600565	1.83e-10	ORF-TU	chromosome1	3218661	3220411	-	gene:SPAC6G10.03c
TU.0732	0.606329	1.38e-10	ORF-TU	chromosome1	2605770	2607377	+	gene:SPAC823.14
TU.1587	0.98169	7.6e-25	ORF-TU	chromosome1	5505621	5508398	+	gene:SPAC869.05c
TU.1584	0.74414	8.27e-13	ORF-TU	chromosome1	5493167	5494953	+	gene:SPAC869.10c
TU.0956	0.634198	0.0223515	ORF-TU	chromosome1	3375549	3376839	+	gene:SPAC8E11.08c
TU.5179	0.673469	2.53e-10	ORF-TU	chromosome1	5486852	5488751	-	gene:SPAC922.07c
TU.3563	1.28555	3.51e-07	ORF-TU	chromosome1	59432	60834	-	gene:SPAC977.14c
TU.0021	1.06902	3e-11	ORF-TU	chromosome1	62975	63803	+	gene:SPAC977.15
TU.3564	1.10974	1.15e-20	ORF-TU	chromosome1	64751	66285	-	gene:SPAC977.16c
TU.4855	0.713607	5.03e-20	ORF-TU	chromosome1	4453283	4457207	-	gene:SPAC9E9.09c
TU.1277	1.53964	2.02e-86	ORF-TU	chromosome1	4461644	4464525	+	gene:SPAC9E9.11
TU.4398	0.894044	2.09e-10	ORF-TU	chromosome1	2872782	2874336	-	gene:SPACUNK4.17
TU.5133	1.3098	1.75e-70	ORF-TU	chromosome1	5319799	5320650	-	gene:SPAP8A3.04c
TU.0847	0.80963	0.0125622	ORF-TU	chromosome1	2977798	2979597	+	gene:SPAPB1A11.01
TU.4424	1.84584	1.43e-116	ORF-TU	chromosome1	2961045	2962496	-	gene:SPAPB24D3.08c
TU.1505	1.15384	1.46e-13	ORF-TU	chromosome1	5187512	5189138	+	gene:SPAPJ691.02
TU.5279	1.58428	5.25e-27	ORF-TU	chromosome2	376215	377002	-	gene:SPBC106.02c
TU.1789	0.673851	2.44e-11	ORF-TU	chromosome2	717746	718982	+	gene:SPBC119.03
TU.5227	0.772652	9.91e-06	ORF-TU	chromosome2	198122	200118	-	gene:SPBC1198.14c
TU.1677	0.633431	3.54e-09	ORF-TU	chromosome2	362865	364856	+	gene:SPBC1271.05c
TU.1676	2.07704	1.77e-55	ORF-TU	chromosome2	358586	359791	+	gene:SPBC1271.07c
TU.1675	1.25567	1.14e-14	ORF-TU	chromosome2	356590	357996	+	gene:SPBC1271.08c
TU.6381	0.611878	1.29e-07	ORF-TU	chromosome2	4391983	4392646	-	gene:SPBC1289.05c
TU.6382	0.600716	3.5e-13	ORF-TU	chromosome2	4393614	4395451	-	gene:SPBC1289.06c
TU.2777	0.713434	8.77e-18	ORF-TU	chromosome2	4081619	4083178	+	gene:SPBC1347.11
TU.2474	0.842575	5.97e-22	ORF-TU	chromosome2	3036095	3037205	+	gene:SPBC15D4.15
TU.6257	1.22869	2.22e-33	ORF-TU	chromosome2	3930739	3933735	-	gene:SPBC1604.01
TU.5211	0.907833	1.03e-08	ORF-TU	chromosome2	151790	152978	-	gene:SPBC1683.06c
TU.5215	1.43664	3.91e-11	ORF-TU	chromosome2	160381	162377	-	gene:SPBC1683.09c
TU.1627	0.656676	1.41e-05	ORF-TU	chromosome2	168670	170132	+	gene:SPBC1683.12
TU.6344	0.643711	2.5e-07	ORF-TU	chromosome2	4267356	4268164	-	gene:SPBC16A3.16
TU.5716	1.05515	1.13e-16	ORF-TU	chromosome2	1947774	1950310	-	gene:SPBC16E9.16c
TU.6090	0.870269	1.73e-12	ORF-TU	chromosome2	3309137	3310267	-	gene:SPBC17D11.03c
TU.5957	1.19454	4.49e-28	ORF-TU	chromosome2	2825397	2826655	-	gene:SPBC19C7.04c
TU.2674	0.744425	5.03e-22	ORF-TU	chromosome2	3709252	3711372	+	gene:SPBC19F5.04
TU.5725	0.628191	3.17e-07	ORF-TU	chromosome2	1974423	1975688	-	gene:SPBC1A4.02c
TU.6291	1.11864	9.88e-29	ORF-TU	chromosome2	4041442	4045411	-	gene:SPBC215.08c
TU.2767	0.701771	1.83e-16	ORF-TU	chromosome2	4048922	4050168	+	gene:SPBC215.10
TU.6293	1.35712	1.87e-52	ORF-TU	chromosome2	4050346	4051470	-	gene:SPBC215.11c
TU.5415	0.682474	4.68e-13	ORF-TU	chromosome2	903004	903797	-	gene:SPBC216.04c
TU.2708	0.660929	1.8e-09	ORF-TU	chromosome2	3830036	3830999	+	gene:SPBC21C3.19
TU.5764	2.55969	5.68e-42	ORF-TU	chromosome2	2118163	2119467	-	gene:SPBC23G7.10c
TU.2256	0.676692	1.22e-10	ORF-TU	chromosome2	2329723	2331756	+	gene:SPBC24C6.06
TU.2436	1.36634	1.66e-64	ORF-TU	chromosome2	2948280	2950199	+	gene:SPBC2A9.02
TU.6119	1.49665	1.51e-80	ORF-TU	chromosome2	3441886	3442722	-	gene:SPBC2G2.04c
TU.2748	0.599744	7.62e-05	ORF-TU	chromosome2	3985424	3986935	+	gene:SPBC32C12.02
TU.5948	0.704428	6.13e-17	ORF-TU	chromosome2	2788555	2789582	-	gene:SPBC32F12.03c
TU.5459	0.609708	6.23e-09	ORF-TU	chromosome2	1044234	1046538	-	gene:SPBC337.08c
TU.1610	0.81143	0.04538	ORF-TU	chromosome2	107653	108928	+	gene:SPBC359.02
TU.1612	0.739647	9.51e-18	ORF-TU	chromosome2	122619	127239	+	gene:SPBC359.05
TU.1613	2.11774	6.52e-30	ORF-TU	chromosome2	128872	129566	+	gene:SPBC359.06
TU.5909	1.19985	4.08e-42	ORF-TU	chromosome2	2660126	2661118	-	gene:SPBC3E7.02c
TU.1712	0.759117	5.43e-16	ORF-TU	chromosome2	465386	467283	+	gene:SPBC428.11
TU.2783	0.861225	4.28e-29	ORF-TU	chromosome2	4094236	4096289	+	gene:SPBC56F2.09c
TU.1936	0.643299	1.21e-05	ORF-TU	chromosome2	1244779	1245660	+	gene:SPBC651.04
TU.1639	1.038	0.00316155	ORF-TU	chromosome2	204469	205615	+	gene:SPBC660.06
TU.5410	0.668952	7.51e-10	ORF-TU	chromosome2	887552	889052	-	gene:SPBC713.11c
TU.1930	0.973837	4.15e-17	ORF-TU	chromosome2	1224566	1226662	+	gene:SPBC725.10
TU.1765	0.651861	2.13e-16	ORF-TU	chromosome2	627999	631554	+	gene:SPBC839.16
TU.5431	0.734931	1.67e-11	ORF-TU	chromosome2	961028	963606	-	gene:SPBP35G2.16c
TU.2416	0.848785	1.24e-05	ORF-TU	chromosome2	2890759	2891877	+	gene:SPBP4H10.10
TU.2649	0.736686	3.45e-12	ORF-TU	chromosome2	3629877	3633997	+	gene:SPBP8B7.32
TU.5199	0.975962	1.4e-18	ORF-TU	chromosome2	83544	85493	-	gene:SPBPB10D8.02c
TU.5195	2.50852	8.3e-82	ORF-TU	chromosome2	64597	65534	-	gene:SPBPB21E7.04c
TU.1600	2.63878	1.33e-156	ORF-TU	chromosome2	70150	71254	+	gene:SPBPB21E7.07
TU.2883	1.32896	1.19e-10	ORF-TU	chromosome2	4466617	4467613	+	gene:SPBPB2B2.05
TU.6399	1.67159	6.24e-30	ORF-TU	chromosome2	4484857	4487515	-	gene:SPBPB2B2.12c
TU.6892	0.651911	1.13e-16	ORF-TU	chromosome3	1852650	1854533	-	gene:SPCC1223.07c
TU.3113	1.26169	4.59e-50	ORF-TU	chromosome3	817960	819733	+	gene:SPCC1393.10
TU.6867	0.706392	1.23e-07	ORF-TU	chromosome3	1779522	1780630	-	gene:SPCC1442.07c
TU.6858	0.662253	6.95e-12	ORF-TU	chromosome3	1757331	1758639	-	gene:SPCC1450.13c
TU.6555	0.74758	1.43e-11	ORF-TU	chromosome3	565675	567539	-	gene:SPCC1672.03c
TU.6935	1.18824	8.95e-07	ORF-TU	chromosome3	2042196	2044080	-	gene:SPCC1739.08c
TU.7044	0.732048	8.75e-13	ORF-TU	chromosome3	2385898	2387572	-	gene:SPCC1827.06c
TU.3510	0.607591	9.66e-05	ORF-TU	chromosome3	2281083	2284600	+	gene:SPCC1840.12
TU.6433	1.20956	9.04e-14	ORF-TU	chromosome3	109630	110555	-	gene:SPCC330.03c
TU.6434	0.851381	0.0355321	ORF-TU	chromosome3	112091	113446	-	gene:SPCC330.04c
TU.6748	0.832845	6.27e-17	ORF-TU	chromosome3	1355107	1355617	-	gene:SPCC338.12
TU.6743	1.22958	3.05e-08	ORF-TU	chromosome3	1340663	1341930	-	gene:SPCC338.18
TU.7056	0.660108	8.35e-05	ORF-TU	chromosome3	2430248	2431477	-	gene:SPCC569.03
TU.7035	1.18605	4.29e-10	ORF-TU	chromosome3	2367661	2368651	-	gene:SPCC70.08c
TU.7031	0.665084	1e-06	ORF-TU	chromosome3	2354843	2356725	-	gene:SPCC70.12c
TU.3403	1.26942	1.22e-17	ORF-TU	chromosome3	1891993	1893456	+	gene:SPCC737.04
TU.6417	0.933564	8.61e-28	ORF-TU	chromosome3	56608	58821	-	gene:SPCC757.07c
TU.2958	1.24817	4.56e-13	ORF-TU	chromosome3	245845	247790	+	gene:SPCC794.03
TU.3514	0.762972	5.22e-15	ORF-TU	chromosome3	2292935	2294450	+	gene:SPCC965.06
TU.7012	3.00796	0	ORF-TU	chromosome3	2294655	2296147	-	gene:SPCC965.07c
TU.3521	0.765175	6.55e-08	ORF-TU	chromosome3	2314759	2315435	+	gene:SPCC965.14c
TU.6658	0.923559	1.64e-07	ORF-TU	chromosome3	956100	957276	-	gene:SPCPB16A4.06c
TU.3450	0.636774	2.66e-11	ORF-TU	chromosome3	2076800	2078993	+	gene:SPCPB1C11.03
