# Supplementary material for: RNA-binding protein Mub1 and the nuclear RNA exosome act to fine-tune environmental stress response
Source: Life Sci Alliance. 2021 Nov 30;5(2):e202101111. doi: 10.26508/lsa.202101111 (PMC8645331; doi:10.26508/lsa.202101111)
Supplement: Supplementary file 9 [file LSA-2021-01111_TableS9.xlsx]

## Sheet: Description
Supplementary Tables
	Table S9 : Raw data ChIP-qPCR

## Sheet: Table 9
raw enrichment		2^(-ct[IP])/2^(-ct[input])
strain		144-1	1081-1	1144-1	1729-1	144-2	1081-2	1144-2	1729-2	144-3	1081-3	1144-3	1729-3
Fbp1c		0.00785891	0.0112295	0.00989203	0.0104377	0.0104604	0.00219705	0.010671	0.00250396	0.00722011	0.00362439	0.00244825	0.0032188
spcc663.08c-2		0.00614944	0.0083045	0.00672211	0.00944162	0.0100576	0.00180802	0.00875372	0.00284773	0.00761693	0.00308942	0.00224419	0.00345616
gst2-2		0.0101936	0.0130719	0.00732022	0.0118958	0.00900347	0.0010434	0.0154521	0.003196	0.00811666	0.00421032	0.00186446	0.00371422
hsp16		0.00262288	0.00463896	0.00511597	0.00466519	0.00709566	0.00190921	0.00414336	0.00204668	0.00359825	0.00239404	0.00203505	0.0024216
normalised enrichment
To Fbp1c
		144-1	1081-1	1144-1	1729-1	144-2	1081-2	1144-2	1729-2	144-3	1081-3	1144-3	1729-3
spcc663.08c-2		0.78248	0.739525	0.679548	0.904572	0.961493	0.822931	0.820331	1.13729	1.05496	0.852398	0.916649	1.07374
gst2-2		1.29708	1.16406	0.740012	1.1397	0.860719	0.474909	1.44805	1.27638	1.12417	1.16166	0.761546	1.15392
hsp16		0.333746	0.413105	0.517181	0.446957	0.678335	0.868984	0.388284	0.817377	0.498365	0.660537	0.831225	0.752331
Average normalised enrichment(to fbp1)
		wt	Dmub1	Mub1-3xFLAG	Mub1-DZ-3xFLAG		SEM normalised enrichment
to fbp1	spcc663.08c	0.932978	0.804951	0.805509	1.03853		0.0800345	0.0338412	0.0689269	0.0695307
	gst2	1.09399	0.933545	0.983203	1.19		0.127017	0.229591	0.232783	0.0434371
	hsp16	0.503482	0.647542	0.578896	0.672222		0.0996249	0.131917	0.131693	0.114322
