# Supplementary material for: RNA-binding protein Mub1 and the nuclear RNA exosome act to fine-tune environmental stress response
Source: Life Sci Alliance. 2021 Nov 30;5(2):e202101111. doi: 10.26508/lsa.202101111 (PMC8645331; doi:10.26508/lsa.202101111)
Supplement: Supplementary file 11 [file LSA-2021-01111_TableS11.xlsx]

## Sheet: Description
Supplementary Tables
	Table S11 : List of oligos

## Sheet: Table 11
Table S8.Oligos
Northern blot probes
rps2202-nor626fw	3762	ATCATTATAATATTTGGAGCACATTG
rps2202-nor776rev	3763	ACATAACTTATCAATGTCTTGTATGGA
Gst2-FW	6442	TTCCATCATGAGCCAGTGGT
gst2-rev	6443	TTCCCTTCCCCGAAAAGACC
hsp16-fw	6440	AAGAATGAAAGCACCGAGGG
hsp16-rev	6441	TTGGGACTTCTCGACCTTGG
SPCC663.08c-fw	6444	TGCCGACACCAAATTATCCAC
SPCC663.08c-rev	6445	ACTGTTCCTTTTCTGTTGCTCA
Adh1-4 Forward	2475	GGTCCCGAGAACGTCAAGT
Adh1-4 Reverse	2476	ACTTGACACCAACACGGTCA
snr92fw	6342	GTACGATCGAAAACCCGCAA
snr92rev	6343	GGGTTGTTTGTCAGTCGTTGA
Tf2-1 fw		CTCACAAGCGTTTTCAACTGC
Tf2-1 rv		TTGAGCGCCCGTATCGATTA
Tagging and deletion strains
Srp40-del-fw	6190	TGTGGGAATATCCCAATTAACAAGTGCCCAGCTTCTGATTTACTAAGGCTGACCTGCACTTAGAAAGTGCCATCTTCGTGGACATGGAGGCCCAGAATAC
Srp40-del-rev	6191	AAACGACTGTAAGTTCTATTGAACTGTCGATCTACATCCAAAAGATCGTAAGTCCTTGTTCAAAATTTGATTGTTGAAATCAGTATAGCGACCAGCATTC
Srp40-check-fw	6192	TAACAAGTGCCCAGCTTCTG
Srp40-check-rev	6193	CACATCTGCTAGGGTAGGGC
SPBC16G5.16 -del-fw	6202	ATAAATACAAATTAAAAGACCTGTTCTCCCTCAAGTTTGAAGTTAGCAGGCTTCAACATAGTTTATTGATAGGCTGCTGAGACATGGAGGCCCAGAATAC
SPBC16G5.16 -del-rev	6203	AAAAAGTGAAGCAAGAATTATTGCAGAAAAAAAAATTTTGAAAACAAAAGTGAGTTTCTATGCTTAACAACATTGATCGCCAGTATAGCGACCAGCATTC
SPBC16G5.16-check-fw	6204	AGACCTGTTCTCCCTCAAGT
SPBC16G5.16-check-rev	6205	TTCTCATGAGCAAACCCTAAAAG
SPBC530.08-del-fw	6198	TCTTTTTACTACTTGAAAAAGTTTTTTTTTATATTTCGCTCTTTATTTACATTTTTTGTTTATTAAAAGGATGTCCCAAAGACATGGAGGCCCAGAATAC
SPBC530.08-del-rev	6199	ATATTGTATATATACATTTATTCATATTATCCATGTAAGCCGTAAGTAAATCCTGATTACGAATAATTATGGTGTAGATTCAGTATAGCGACCAGCATTC
SPBC530.08-check-fw	6200	AAGTCTCTGTCTGTGGCTCA
SPBC530.08-check-rev	6201	TACCTTGCCAGACTGTTCGA
Swt1-del-fw	6186	GTTCATCAATTTGAGTATTACTCGTTCATGTATCTGTATAGTAGACTGCACGTACAGTTGCTTTTTGTCACTTGCTAGCAGACATGGAGGCCCAGAATAC
Swt1-del-rev	6187	TCTTTTTGGTGCTACAAAAAAAGGATATAGTTGGTGAATATTTTCATTAATGTATTAATTTAGCAATATTTATATTTTTTCAGTATAGCGACCAGCATTC
check-swt1-fw	6188	TGCACAGTGTACGCAGGTAA
check-swt1-rev	6189	AACTAAAAGCGCGGTCTCTT
SPBC31F10.10c.del.rev	6144	CCTCCAACTGTAAGTCTATTTGAAGCGTAAGCATACCTAGTAAGAAATGGATAGAAATTGTCATTAAACTGTCATTAGTACAGTATAGCGACCAGCATTC
SPBC31F10.10c.del.fw	6143	CTTTGCGTTTGCCAGTAATTTATACTGCAGCAATTGTCTTTAAAAAACTTTATACGTGTTAAATATATTATTAAAGAAAGGACATGGAGGCCCAGAATAC
SPBC31F10.10c-flag-check	6287	CCGGCTGCATCTGTTATTCC
SPBC31F10.10c-tag-fw		CAACAGCATCCCCGGCTGCATCTGTTATTCCTGTTGGAACAGAATCTGTAACTTCAAGCACTCAGAGTGATAGCAGATTGGGGGGAGGCGGGGGTGGAGA
SPBC31F10.10c-tag-rev		CCTCCAACTGTAAGTCTATTTGAAGCGTAAGCATACCTAGTAAGAAATGGATAGAAATTGTCATTAAACTGTCATTAGTACAGTATAGCGACCAGCATTC
SPBC31F10.10c-check-fw	6149	CTGCTATCGGCGTTTGTTCT
SPBC31F10.10c-check-rev	6150	CCCTGCTAAAACCACACGAT
SPBC18H10.09-del-fw	6145	AGGAAGAACCGAGTATTTGTGTTGGCGACTTAACCTGAATTGAACCAAATACTACAAGACTATAGCCTTTTTTGGTTATTGACATGGAGGCCCAGAATAC
SPBC18H10.09-del-rev	6146	TAACTACTTGTTATTCATTAAATTTTTATACAATATGGGTATCTAATGAAGCAAAAAAATATGGATGTCATGCAACCCAACAGTATAGCGACCAGCATTC
SPBC18H10.09-check-fw	6151	AGCGTTGTCCTCTGAAGGAA
SPBC18H10.09-check-rev	6152	GAGAAGCTAAGGAGCGAGCA
Pof8-del-fw	6177	AAGAGCACCTAATTCTATTTATTATTAATGACTTCACTTTAATTGATACTAGAAAACCGTACTTTAAGGAGCGAAGTAAAGACATGGAGGCCCAGAATAC
Pof8-del-rev	6178	TTTTGTATGCCTATATTACCAGAATATATTATAAAGTAGTAAATAAATCAAATTAGTATTACCAGAGAAAGGAAAACATACAGTATAGCGACCAGCATTC
check pof8-fw	6179	TTCAAGGCTTACGGATGGGT
SPCC126.11c-del-fw	6180	AGGATCTCCCGTCTCACCTCCAATTCCTGCTACTAAGCAGCACTACCACCAACACGCACCTAATAAGTTCTCGTGGACGGGACATGGAGGCCCAGAATAC
SPCC126.11c-del-rev	6181	AGTAGGTATCATATTAAGTCACGTACACTTCAGTGGAAGCAAAAAATAAGTATGAAAAGAATCTAACAGCTGCAAAAAGTCAGTATAGCGACCAGCATTC
SPCC126.11c-check-fw	6182	CCGTCTCACCTCCAATTCCT
SPCC126.11c-check-rev	6183	TGCATGACCCAGAATCAGCT
SPCC31H12.03c -del-fw		CATATTCACCCTTGTCAACTGCGTATATCCCGAATTCAATAAACGTGTTATTTTGACGCGCATATACGTCTATATTCATAGACATGGAGGCCCAGAATAC
SPCC31H12.03c -del-rev		AAGCATGGCATGAGGAGAAAACTTCAAGAAACATGAGTCATATTGTAAAATAAGAAGTTAAAATATGTTAAATGGTTACTCAGTATAGCGACCAGCATTC
SPCC31H12.03c-check-fw		GCTTCATTTGCGCATCCAAC
SPCC31H12.03c-check-rev		TCGACATTGTTGGAAGTAAAGGT
qPCR primers
3072_FBP1-fwd		ACTGCGATGAAGTCGAACG
3032_FBP1-rev		CAAGTGACGGCATAGGAACC
gst2-2F		GGA CAA GGC GTT ATT TGG GG
gst2-2R		TCA AGT ACT CCA AGA ACA CGC
spcc663-08c_2F		AGGCTGCCTTAA ATT ATA CGA TGA
spcc663-08c_2R		GAA TCG GTT CGG ACA GCT C
hsp16-1315F		AAGAATGAAAGCACCGAGGG
hsp16-1408R		CTGCATCAATCTTGGCTGGA
